# Supplementary material for: Expanding the upper age limit for cervical cancer screening: a protocol for a nationwide non-randomised intervention study
Source: PubMed Central journal article supplement — BMJ Open. 2020 Nov 5;10(11):e039636. doi: 10.1136/bmjopen-2020-039636 (PMC7646343; doi:10.1136/bmjopen-2020-039636), 2020-11-05
Supplement: bmjopen-2020-039636.draft_revisions.pdf [file bmjopen-2020-039636.draft_revisions.pdf]

# BMJ Open

BMJ Open is committed to open peer review. As part of this commitment we make the peer review history of every article we publish publicly available.

When an article is published we post the peer reviewers' comments and the authors' responses online. We also post the versions of the paper that were used during peer review. These are the versions that the peer review comments apply to.

The versions of the paper that follow are the versions that were submitted during the peer review process. They are not the versions of record or the final published versions. They should not be cited or distributed as the published version of this manuscript.

BMJ Open is an open access journal and the full, final, typeset and author-corrected version of record of the manuscript is available on our site with no access controls, subscription charges or pay-per-view fees (<http://bmjopen.bmj.com>).

If you have any questions on BMJ Open's open peer review process please email [info.bmjopen@bmj.com](mailto:info.bmjopen@bmj.com)

# BMJ Open

## EXPANDING THE UPPER AGE LIMIT FOR CERVICAL CANCER SCREENING: A PROTOCOL FOR A NATIONWIDE NON-RANDOMIZED INTERVENTION STUDY

|                               |                                                                                                                                                                                                                                                                                                                                                                                                                                                                                                                                                                                                                                                                                                                                                                                                                                                                                                                                                                                  |
|-------------------------------|----------------------------------------------------------------------------------------------------------------------------------------------------------------------------------------------------------------------------------------------------------------------------------------------------------------------------------------------------------------------------------------------------------------------------------------------------------------------------------------------------------------------------------------------------------------------------------------------------------------------------------------------------------------------------------------------------------------------------------------------------------------------------------------------------------------------------------------------------------------------------------------------------------------------------------------------------------------------------------|
| Journal:                      | <i>BMJ Open</i>                                                                                                                                                                                                                                                                                                                                                                                                                                                                                                                                                                                                                                                                                                                                                                                                                                                                                                                                                                  |
| Manuscript ID                 | bmjopen-2020-039636                                                                                                                                                                                                                                                                                                                                                                                                                                                                                                                                                                                                                                                                                                                                                                                                                                                                                                                                                              |
| Article Type:                 | Protocol                                                                                                                                                                                                                                                                                                                                                                                                                                                                                                                                                                                                                                                                                                                                                                                                                                                                                                                                                                         |
| Date Submitted by the Author: | 21-Apr-2020                                                                                                                                                                                                                                                                                                                                                                                                                                                                                                                                                                                                                                                                                                                                                                                                                                                                                                                                                                      |
| Complete List of Authors:     | <p>tranberg, mette; Regional Hospital Randers, Department of Public Health Programmes</p> <p>Petersen, Lone; Odense University Hospital, Department of Obstetrics and Gynecology; University of Southern Denmark, OPEN, Department of Clinical Medicine</p> <p>Elfström, Klara; Karolinska Institutet, Dept of Laboratory Medicine; Regional Cancer Center, Cancer Screening Unit</p> <p>Hammer, Anne ; Aarhus University, Department of Clinical Medicine; Regionshospitalet Herning, Department of Obstetrics and Gynecology</p> <p>Blaakær, Jan; University of Southern Denmark, OPEN, Department of Clinical Medicine; Odense University Hospital, Department of Obstetrics and Gynecology</p> <p>Bennetsen, Mary; Regional Hospital Randers, Department of Pathology</p> <p>Jensen, Jørgen; Statens Serum Institut, Mycoplasma Laboratory</p> <p>Andersen, Berit; Randers Regional Hospital, Public Health Programs; Aarhus University, Department of Clinical Medicine</p> |
| Keywords:                     | EPIDEMIOLOGY, Cytopathology < PATHOLOGY, PREVENTIVE MEDICINE, PUBLIC HEALTH, GYNAECOLOGY                                                                                                                                                                                                                                                                                                                                                                                                                                                                                                                                                                                                                                                                                                                                                                                                                                                                                         |
|                               |                                                                                                                                                                                                                                                                                                                                                                                                                                                                                                                                                                                                                                                                                                                                                                                                                                                                                                                                                                                  |

SCHOLARONE™  
Manuscripts

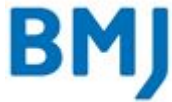

I, the Submitting Author has the right to grant and does grant on behalf of all authors of the Work (as defined in the below author licence), an exclusive licence and/or a non-exclusive licence for contributions from authors who are: i) UK Crown employees; ii) where BMJ has agreed a CC-BY licence shall apply, and/or iii) in accordance with the terms applicable for US Federal Government officers or employees acting as part of their official duties; on a worldwide, perpetual, irrevocable, royalty-free basis to BMJ Publishing Group Ltd ("BMJ") its licensees and where the relevant Journal is co-owned by BMJ to the co-owners of the Journal, to publish the Work in this journal and any other BMJ products and to exploit all rights, as set out in our [licence](#).

The Submitting Author accepts and understands that any supply made under these terms is made by BMJ to the Submitting Author unless you are acting as an employee on behalf of your employer or a postgraduate student of an affiliated institution which is paying any applicable article publishing charge ("APC") for Open Access articles. Where the Submitting Author wishes to make the Work available on an Open Access basis (and intends to pay the relevant APC), the terms of reuse of such Open Access shall be governed by a Creative Commons licence – details of these licences and which [Creative Commons](#) licence will apply to this Work are set out in our licence referred to above.

Other than as permitted in any relevant BMJ Author's Self Archiving Policies, I confirm this Work has not been accepted for publication elsewhere, is not being considered for publication elsewhere and does not duplicate material already published. I confirm all authors consent to publication of this Work and authorise the granting of this licence.

# EXPANDING THE UPPER AGE LIMIT FOR CERVICAL CANCER SCREENING: A PROTOCOL FOR A NATIONWIDE NON-RANDOMIZED INTERVENTION

## STUDY

Mette Tranberg<sup>1\*</sup>, PhD, MSch.

Lone Kjeld Petersen<sup>2,3</sup>, MD, DMSc., Professor

Miriam Elfström<sup>4,5</sup>, PhD, MPH

Anne Hammer<sup>6,7</sup>, MD, PhD, Associate professor

Jan Blaakær<sup>2,3</sup>, MD, DMSc., Professor

Mary Holten Bennetsen<sup>8</sup>, MD

Jørgen Skov Jensen<sup>9</sup> MD, PhD, DMSc.,

Berit Andersen<sup>1,6</sup> MD, PhD, Professor

### Affiliations:

1. Department of Public Health Programmes, Randers Regional Hospital, Randers Denmark

2. Department of Obstetrics and Gynecology, Odense University Hospital, Odense Denmark

3. OPEN, Department of Clinical Medicine, Southern University of Denmark, Odense, Denmark

4. Department of Laboratory Medicine, Karolinska Institute, Stockholm, Sweden

5. Regional Cancer Center of Stockholm-Gotland, Stockholm, Sweden

6. Department of Clinical Medicine, Aarhus University, Aarhus, Denmark

7. Department of Obstetrics and Gynecology, Herning Regional Hospital, Herning, Denmark

8. Department of Pathology, Randers Regional Hospital, Randers, Denmark

9. Research Unit for Reproductive Microbiology, Statens Serum Institut, Copenhagen, Denmark

### Corresponding author:

Mette Tranberg, Department of Public Health Programmes. Randers Regional Hospital, Skovlyvej 15, 8930 Randers

NO, Denmark E-mail: mettrani@rm.dk. Tel: (+45) 78 42 02 64. ORCID:0000-0002-6285-6694.

1  
2  
3  
4  
5  
6  
7  
8  
9  
10  
11  
12  
13  
14  
15  
16  
17  
18  
19  
20  
21  
22  
23  
24  
25  
26  
27  
28  
29  
30  
31  
32  
33  
34  
35  
36  
37  
38  
39  
40  
41  
42  
43  
44  
45  
46  
47  
48  
49  
50  
51  
52  
53  
54  
55  
56  
57  
58  
59  
60

33 **E-mails:** Lone Kjeld Petersen: Lone.Kjeld.Petersen@rsyd.dk; Miriam Elfström: miriam.elfstrom@ki.se; Anne Hammer:

34 ahlauridsen@clin.au.dk; Jan Blaakær: jab@dadlnet.dk; Mary Holten Bennetsen: maryha@rm.dk; Jørgen Skov Jensen:

35 jsj@ssi.dk; Berit Andersen: berand@rm.dk

36  
37 **Number of words in text:** 3,891

38  
39 **Number of words in abstract:** 295

40 **Number of figures:** 3

41 **Number of tables:** 1

42 **Number of references:** 51

43  
44 **Trial registration:** NCT04114968.

45 **s:**

46 **Keywords:** Mass screening, HPV DNA testing, older women, cervical cancer screening, cervical cancer

## 48 **ABSTRACT**

### 50 **Introduction**

51 Cervical cancer screening ceases between the ages of 60 and 65 in most countries. Yet, a relatively high  
52 proportion of cervical cancers are diagnosed in women above the screening age. This study will evaluate if  
53 expanding the upper screening age to include women aged 65-69 years results in increased detection of  
54 cervical intraepithelial neoplasia grade 2 or worse (CIN2+) compared to women not offered screening, and  
55 to determine if cervico-vaginal self-sampling for human papillomavirus (HPV self-sampling) is superior to  
56 general practitioner (GP)-based screening in reaching long-term unscreened women.

### 57 **Methods**

58 This population-based non-randomized intervention study will include 10,000 women aged 65-69 years,  
59 with no record of a cervical cytology sample or screening invitation in the 5 years before inclusion. Women  
60 who have opted-out of the screening program or have a record of hysterectomy or cervical amputation are  
61 excluded. Women residing in the Central Denmark Region are allocated to the intervention group, while  
62 women residing in the remaining four Danish regions are allocated to the reference group.

63 The intervention group is invited for HPV-based screening by attending routine screening at the GP or by  
64 requesting a self-sampling kit. The reference group receives standard care which is the opportunity to have  
65 a cervical cytology sample obtained at the GP or by a gynecologist. The study started in April 2019 and will  
66 run over the next 2.5 years.

### 67 **Analyses**

68 The primary outcome will be the proportion of CIN2+ detected in the intervention and reference groups.

### 69 **Ethics and dissemination**

70 The study has been submitted to the Ethical Committee which deemed that the study was not notifiable to  
71 the Committee and informed consent is therefore not required. The study is approved by the Danish Data

1  
2  
3  
4  
5  
6  
7  
8  
9  
10  
11  
12  
13  
14  
15  
16  
17  
18  
19  
20  
21  
22  
23  
24  
25  
26  
27  
28  
29  
30  
31  
32  
33  
34  
35  
36  
37  
38  
39  
40  
41  
42  
43  
44  
45  
46  
47  
48  
49  
50  
51  
52  
53  
54  
55  
56  
57  
58  
59  
60

72 Protection Regulation and the Danish Patient Safety Authority. Results will be disseminated in peer-  
73 reviewed journals.

74

For peer review only

## STRENGTHS AND LIMITATIONS OF THIS STUDY

- This population-based intervention study will provide new evidence on the effect of including women aged 65-69 years in organized cervical cancer screening
- This study is the first to evaluate if HPV self-sampling is superior to general practitioner-based screening in reaching long-term unscreened women aged 65-69 years
- The risk of information bias and selection problems are minimized by using high-quality Danish registries and a population-based design
- The study design entails a risk of confounding due to the lack of randomization



1  
2  
3  
4  
5  
6  
7  
8  
9  
10  
11  
12  
13  
14  
15  
16  
17  
18  
19  
20  
21  
22  
23  
24  
25  
26  
27  
28  
29  
30  
31  
32  
33  
34  
35  
36  
37  
38  
39  
40  
41  
42  
43  
44  
45  
46  
47  
48  
49  
50  
51  
52  
53  
54  
55  
56  
57  
58  
59  
60

## 85 INTRODUCTION

86  
87 Cervical cancer screening ceases between the ages of 60 and 65 in most Western countries (1-3). There is  
88 no solid evidence about which age and with which criteria to cease screening (1, 4-6), but the cessation of  
89 screening in older women is often justified by a low prevalence of high-risk human papillomavirus (HPV) in  
90 women  $\geq 55$  years (7, 8) and by a concern that the harms of continuing screening may outweigh potential  
91 benefits (2). Many countries with long-established screening programs, including Denmark, experience a  
92 second incidence peak of cervical cancer around the age of 75-80 years (9, 10). These older women are  
93 more often diagnosed with advanced-stage disease and mortality due to cervical cancer is high as  
94 compared to younger women (11, 12). It has been hypothesized that the incidence peak could be a result  
95 of a mid-life change of sexual partners or reactivation of a latent HPV infection as the immune system  
96 weakens with age (13-16). However, a recent Danish study of HPV DNA prevalence in women aged 69 and  
97 above showed no increase in prevalence that could explain the cervical cancer peak in this age group (17).  
98 It has also been hypothesized that the current peak in older ages could be attributed to an insufficient  
99 screening history in older birth cohorts (18). Whatever the reason, the increasing female life expectancy (at  
100 age 65 years it is about 20 additional years) has raised the question if the upper age limit for screening  
101 should be extended to 69 or 70 years (10, 19, 20). Case-control studies have reported benefits of cervical  
102 cytology screening at older ages with respect to reduced incidence and mortality (7, 21-24), even among  
103 previously screened women (4). However, a prospective evaluation of HPV-screening at ages 65-69 in a  
104 population-based intervention study including a reference group is missing.  
105 The effectiveness of cervical cancer screening among older women will depend on the participation rate  
106 and, in particular, the ability to reach long-term unscreened women, as these women have a pronounced  
107 risk of cancer (6, 25). Currently, participation in routine screening decreases with increasing age leaving a  
108 relatively high proportion of older women under-screened (10). A potential solution to this challenge could  
109 be to offer older women a self-sampling kit for HPV testing (HPV self-sampling). HPV self-sampling is an  
110 accurate and well-accepted screening method, proven superior to physician-based screening in reaching

1  
2  
3  
4 111 long-term unscreened women (26, 27). Yet, it remains unknown whether an older screening population will  
5  
6 112 benefit from a self-sampling offer.  
7  
8

## 9 113 **OBJECTIVES**

10  
11  
12 114 This study will evaluate if expanding the upper screening age to include women aged 65-69-year results in  
13  
14 115 increased detection of cervical intraepithelial neoplasia grade 2 or worse (CIN2+) compared to women not  
15  
16 116 offered screening and will establish whether HPV self-sampling is better than general practitioner (GP)-  
17  
18 117 based screening in reaching long-term unscreened women.  
19

## 20 118 **HYPOTHESES**

21  
22  
23 119 We hypothesize that expanding the upper screening age will result in increased detection of CIN2+ cases  
24  
25  
26 120 and, long-term, potentially reduce the cervical cancer incidence compared to women not offered screening.  
27  
28 121 Finally, we hypothesize that HPV self-sampling will be superior to GP-based screening in reaching long-term  
29  
30 122 unscreened women.  
31

1  
2  
3  
4  
5  
6  
7  
8  
9  
10  
11  
12  
13  
14  
15  
16  
17  
18  
19  
20  
21  
22  
23  
24  
25  
26  
27  
28  
29  
30  
31  
32  
33  
34  
35  
36  
37  
38  
39  
40  
41  
42  
43  
44  
45  
46  
47  
48  
49  
50  
51  
52  
53  
54  
55  
56  
57  
58  
59  
60

## METHODS AND ANALYSIS

### Setting

Organized cervical cancer screening was introduced in parts of Denmark in the 1960s and became nationwide in the late 1990s (28, 29). Screening in Denmark is currently organized by the five regions (North, Central, South, Zealand, and Capital) following national guidelines (29, 30). Cervical cancer screening is centralized to one or a few pathology departments in each region (29). Danish women are invited to schedule an appointment with their GP for liquid-based cytology screening every third year when aged 23 to 49 years and every fifth year when aged 50 to 64 years(29). Since 2012, women aged 60-64 years have been screened with an HPV DNA-check-out test, after which HPV negative women can exit the program without consideration of their previous screening history (30). Outside the organized program, women can have a cervical cytology sample taken by a GP or a gynecologist opportunistically or due to clinical symptoms at any time. In Denmark, cervical cancer screening, including clinical follow-up and treatment, is free of charge (29).

The intervention in this study will be run by the Department of Public Health Programmes, Randers Regional Hospital in the Central Denmark Region (CDR). The CDR is the second largest region in Denmark covering approximately one-fourth of the Danish population (1.2 million inhabitants)(20). In the CDR, the Department of Public Health Programmes oversees sending screening invitations, reminders, and test results, while the Department of Pathology, Randers Regional Hospital handles and analyses all cervical cytology samples.

## **The call-recall invitation system**

The Danish screening program is based on an integrated call-recall system using data from the invitation module in the nationwide Danish Pathology Databank (DPDB) (29, 31, 32). The Conseillers en Gestion et Informatique (CGI) Institute operates the call-recall system and it is designed so that each region only invites women residing in their catchment area. The call-recall system invites women for screening after the age-specific interval has passed since their latest invitation or cervical cytology sample (whichever came last). Samples obtained opportunistically, symptomatically or as part of surveillance are also recorded in the DPDB and postpone the next invitation. The system also keeps track of women who are ineligible for screening because they have actively opted out of the program or have had a hysterectomy. The latter registration is rather incomplete and varies between the regions. In detail, the invitation module links cervical cytology data (Systematized Nomenclature of Medicine, SNOMED codes: T8X3\* and T8X210) from the DPDB's main pathology module with information about residency and vital status from the Danish Civil Registration System (33, 34). Linkage is performed using the unique Civil Personal Registration number (CPR), which is assigned to every Danish citizen upon birth and to residents upon immigration (34). The CPR number is used by all citizens for any contact to the Danish health care system.

## **Design and eligibility criteria**

This study is a nationwide prospective population-based non-randomized intervention study (i.e. a quasi-experimental design) (35). Women will consecutively be deemed eligible if they meet the following criteria at the time of inclusion: aged 65 to 69 years; resident in Denmark for the past 5 years; no record of a cervical cytology sample or invitation in the past 5 years; not registered in the invitation module as having actively opted out of the screening program or having a record of total hysterectomy or cervical amputation in the Danish National Patient Register (36). Eligible women residing in the CDR will be allocated to the intervention group, while women residing in the other four Danish regions will be allocated to the reference group (Figure 1). In the intervention group, the invitation module will be set-up to identify

1  
2  
3  
4 170 women fitting the inclusion criteria, and simultaneously a comparable list of eligible women in the  
5  
6 171 reference group will be compiled by CGI at the Department of Public Health Programmes' request. Inclusion  
7  
8  
9 172 started in April 2019 and eligible women will be identified with six months intervals until the desired  
10  
11 173 number of women have been included. The follow-up period for the included women will start on the date  
12  
13 174 of the invitation and end at time of death, emigration, cervical amputation, total hysterectomy, or end of  
14  
15 175 study. Women that move between the intervention region and reference regions in the follow-up period  
16  
17  
18 176 will subsequently be excluded from the analysis.

### 21 177 **Intervention group**

22  
23 178 Women living in the CDR and therefore eligible for the intervention group will be invited to HPV-based  
24  
25 179 cervical cancer screening by either scheduling an appointment for having a cervical cytology sample  
26  
27  
28 180 collected at their GP or collecting a cervico-vaginal sample themselves in their own home using a self-  
29  
30 181 sampling kit. Women will receive an invitation and an information sheet by digital mail, while those  
31  
32 182 exempted from digital mail as per routine will receive the information by postal mail (37). The invitation  
33  
34 183 explains how to request the self-sampling kit and states that once the woman attends screening it will  
35  
36  
37 184 implicitly represent her consent to store her sample for future quality improvement of the screening  
38  
39 185 program. A phone number for calling the study investigator to decline this option will be available. Test  
40  
41 186 results, including follow-up recommendations, will be sent to the women by digital or postal mail and the  
42  
43 187 woman's GP will receive an electronic copy of the test result. Around 98% of all residents in Denmark are  
44  
45 188 listed with a GP (38). As per routine, non-participants will receive up to two reminders at 3 and 6 months  
46  
47  
48 189 post invitation (29). All information will be in Danish.

### 50 190 **The self-sampling kit**

51  
52 191 The self-sampling kit can be requested by phone or through a study webpage. After receiving the orders in  
53  
54  
55 192 the department, the kit will be mailed to the women within four business days. The kit includes the dry  
56  
57 193 Evalyn® brush self-sampling device (Rovers Medical Devices B.V, Oss, Netherlands) (39), written and  
58  
59  
60

1  
2  
3  
4 194 picture-based user instructions on how to collect and mail the self-sample, and a pre-stamped return  
5  
6 195 envelope addressed to the Department of Pathology, Randers Regional Hospital (40). The acceptability of  
7  
8  
9 196 both the self-sampling device and user instructions has been carefully evaluated in previous studies,  
10  
11 197 although among younger women (30-59 years) (41, 42).

### 13 198 **Processing and analysis of samples**

14  
15  
16 199 In the intervention group, all samples will be prepared, processed and analyzed at the Department of  
17  
18 200 Pathology, Randers Regional Hospital according to the routine laboratory protocols. All HPV testing will be  
19  
20 201 performed using the clinically validated and Federal Drug Agency (FDA)-approved Cobas® 4800 DNA test  
21  
22 202 (Roche Diagnostics, Switzerland) (43), as this is the routine test platform used in the CDR. The test is an  
23  
24  
25 203 automated real-time PCR-based test designed to detect high-risk HPV types: 16,18,31,33,35,39,45,51,52,  
26  
27 204 56,58,59,66 and 68 (43, 44). Results will be reported as 1) HPV negative, 2) HPV positive (HPV16, HPV18  
28  
29 205 and/ or other HPV types) or 3) invalid (40). All samples with an invalid test result will be re-tested, and the  
30  
31 206 second result will be considered definitive. The Cobas test measures beta-globin as an internal control for  
32  
33  
34 207 sample cellularity, valid sample extraction, and amplification (44).

35  
36 208 As per routine, cervical cytology samples taken by the GPs will be collected using a cervical brush and rinsed  
37  
38 209 in 10 mL SurePath medium (BD Diagnostics, Burlington, NC) and mailed to the Department of Pathology,  
39  
40 210 Randers Regional Hospital for processing and HPV testing. For HPV positive women, reflex cytology testing  
41  
42 211 will be performed on the residual cellular Surepath material. Cytology will be interpreted by  
43  
44  
45 212 cytotechnologists using computer-assisted microscopy and categorized per the Bethesda 2015 grading  
46  
47 213 system as normal; inadequate; Atypical Squamous Cells of Undetermined Significance (ASC-US); Low-grade  
48  
49 214 Squamous Intraepithelial Lesion (LSIL); Atypical Squamous Cells cannot exclude HSIL (ASC-H). High-grade  
50  
51 215 Squamous Intraepithelial Lesion (HSIL); Squamous Cell Carcinoma (SCC); Atypical Glandular Cells (AGC),  
52  
53  
54 216 Adenocarcinoma In Situ (AIS); Adenocarcinoma (ACC), and malignant tumor cells. At the laboratory, the  
55  
56 217 Evalyn brush device will be rinsed into 10 mL SurePath medium (BD Diagnostics, Burlington, NC) and  
57  
58 218 processed as previously described (41).

59  
60

1  
2  
3  
4  
5  
6  
7  
8  
9  
10  
11  
12  
13  
14  
15  
16  
17  
18  
19  
20  
21  
22  
23  
24  
25  
26  
27  
28  
29  
30  
31  
32  
33  
34  
35  
36  
37  
38  
39  
40  
41  
42  
43  
44  
45  
46  
47  
48  
49  
50  
51  
52  
53  
54  
55  
56  
57  
58  
59  
60

219 From the cervical cytology samples and self-samples, 2 mL of the SurePath medium will be placed in test  
220 tubes for HPV testing. The residual eluate material from these samples will be stored at -80°C for future  
221 extended genotyping and DNA methylation analysis. As part of the study, p16/Ki67 cytology dual staining  
222 (CINtec® PLUS cytology kit, Roche Diagnostics) will be performed consecutively on the residual SurePath  
223 cell-pellet obtained from women with an HPV positive cervical cytology sample and sufficient material for  
224 cytology testing. The dual staining result will not affect the clinical management of the woman. Except for  
225 the dual staining result, all test results will routinely be registered in the DPDB (32).

### 226 **Clinical management**

227 Figures 2 and 3 show the recommended, and therefore, expected clinical management for women in the  
228 intervention group, but management may deviate depending on the clinical presentation of the individual  
229 woman. The recommendations are in accordance with the routine screening guidelines for 60-64-year-old  
230 women and the new guidelines for clinical management of older women with dysplasia and HPV (30, 45).

231 Women who are positive for HPV16 or 18 AND other types will be managed similar to HPV16/18 positive  
232 women.

233 For women attending GP-based screening, those who tested HPV negative will have no further follow-up  
234 (Figure 2). Women tested positive for HPV 16/18 will be referred directly to colposcopy (regardless of the  
235 cytology result). Women tested HPV positive for other types than HPV16/18 with ASC-US or more severe  
236 cytological abnormalities will be referred to colposcopy, while women with HPV types other than HPV16/18  
237 and normal cytology will undergo repeated co-testing (HPV and cytology) after 12 months and will be  
238 referred for colposcopy if either test result is positive.

239 Figure 3 presents the follow-up recommendations for women attending HPV self-sampling. Women who  
240 tested HPV negative in their self-sample will have no further follow-up. Women with an HPV positive self-  
241 sample (any genotype) will be advised to have a cervical cytology triage sample taken by their GP within 30  
242 days to evaluate the need for referral to colposcopy. This triage sample will be co-tested with HPV and  
243 cytology. Women tested HPV negative with normal cytology will have no further follow-up, while those

1  
2  
3  
4  
5  
6  
7  
8  
9  
10  
11  
12  
13  
14  
15  
16  
17  
18  
19  
20  
21  
22  
23  
24  
25  
26  
27  
28  
29  
30  
31  
32  
33  
34  
35  
36  
37  
38  
39  
40  
41  
42  
43  
44  
45  
46  
47  
48  
49  
50  
51  
52  
53  
54  
55  
56  
57  
58  
59  
60

244 with ASC-US/LSIL cytology will undergo a repeat co-test (HPV and cytology) after 12 months and will be  
245 referred for colposcopy if either test result is positive. Those with ASC-H or more severe abnormalities will  
246 be referred for colposcopy. Women with an HPV positive triage cytology sample will follow the same  
247 recommendation as described for the GP-based screening (Figure 2).

248 For women referred for colposcopy, cervical punch biopsies will be taken from suspicious areas,  
249 supplemented with random biopsies according to Danish guidelines (46). Some women may also undergo a  
250 diagnostic conization as part of a clinical "See and Treat" study (47). Histological examination of the cervical  
251 biopsies will be carried out at different local Pathology Departments and graded using the Cervical  
252 Intraepithelial Neoplasia (CIN) classification as normal (including inflammation and non-specific reactive  
253 features), CIN (not specified), CIN grade 1, 2 or 3/AIS, or invasive cancer.

#### 254 **Reference group**

255 Women in the reference group will receive usual care which, for 65-69-year-old women, is the opportunity  
256 to have a cervical cytology sample obtained at their GP or by a gynecologist for whatever reason. The  
257 women will not receive a screening invitation, but will be assigned individual pseudo screening invitation  
258 dates allowing comparison between the groups in our statistical analysis. In the following, the term  
259 "invitation date" will be used for both for the "true invitation dates" in the intervention group and "pseudo  
260 invitation dates" in the reference group. In all reference regions, samples from this age group are expected  
261 to be tested for HPV. Differences across the four regions are found in the HPV assay (17) and there may be  
262 minor differences in the triage-strategies, which may result in differences in indication for colposcopy  
263 referral. However, clinical management of women referred for colposcopy is expected to follow national  
264 guidelines as described above (45, 46).

265



1  
2  
3  
4  
5  
6  
7  
8  
9  
10  
11  
12  
13  
14  
15  
16  
17  
18  
19  
20  
21  
22  
23  
24  
25  
26  
27  
28  
29  
30  
31  
32  
33  
34  
35  
36  
37  
38  
39  
40  
41  
42  
43  
44  
45  
46  
47  
48  
49  
50  
51  
52  
53  
54  
55  
56  
57  
58  
59  
60

## 266 **Outcomes**

267 In both groups, the primary outcome will be the proportion of CIN2+ (CIN2, CIN3/AIS, and cancer) detected  
268 within 6 months following registration of a cervical cytology sample or self-sample. The proportion of CIN3+  
269 (CIN3/AIS, and cancer) will be a secondary outcome. The most severe histological test result will be used if  
270 more than one result is available in the follow-up period. Other outcomes in the intervention group will be  
271 screening participation measured 12 months after the invitation date, defined by returning a self-sample or  
272 having a cervical cytology taken; screening history of participants, stratified by sampling procedure; HPV  
273 positivity rate and HPV type distribution in self-samples versus GP-collected cervical cytology samples; and  
274 the percentage of HPV positive self-samplers undergoing appropriate follow-up. Follow-up after self-  
275 sampling will be defined as attending a GP for a cervical cytology-triage sample within 30, 60, 90 or 180  
276 days after mailing of the test results. The proportion of cervical cytology samples obtained among women  
277 not invited for screening will be identified in the reference group and measured 12 months post invitation  
278 date. As in another study (2), the primary measure of harms will in both groups be the number of  
279 colposcopies/conizations performed, both overall and relatively to CIN2, CIN3/AIS, and cancers detected  
280 within a follow-up period of 6 months after registration of a cervical cytology sample or self-sample. Long-  
281 term outcomes will be cervical cancer incidence rates reported by groups at 5- and 10-years post invitation  
282 dates. A description of histological type and FIGO stage of the detected cervical cancers will be provided.

## 283 **Data sources and statistical analysis**

284 An overview of data sources and information is seen in Table 1.  
285 Baseline characteristics in both groups will be presented using descriptive statistics (numbers and  
286 proportions) on screening history and sociodemographic factors (e.g. age, marital status, and education  
287 level). Screening history will be categorized based on the woman's screening history in a 15-year period  
288 before screening exit (i.e. age 50-64) according to the results of the cytology screening at age 50-59 and the  
289 HPV-exit test at age 60-64. The categorization of screening history is expected to be as follows (6):

1  
2  
3  
4 290 1) "Sufficiently screened with normal results" if women had a) at least one normal cytology at age 50-54  
5  
6 291 and b) at least one normal cytology at age 55-59, and c) no abnormal cytology (ASC-US or worse) at age 50-  
7  
8 292 59, and d) HPV negative at age 60-64; 2) "Insufficiently screened with normal results" if women had one or  
9  
10 more cytology samples with only normal results, but only in one or two age categories (50-54, 55-59 or 60-  
11 293 64); 3) "Long-term unscreened" if no cervical cytology sample at age 50-64; and 4) "Abnormal screening" if  
12  
13 294 women a) had ASC-US or worse at least once at age 50-59 or b) HPV positive at age 60-64.  
14  
15 295

16  
17 Screening participation, cervical cytology samples, numbers of colposcopies/conizations performed,  
18 296  
19 compliance to follow-up among positive self-samplers, and disease outcomes (HPV positivity rate and  
20 297  
21 histological outcomes) will be estimated as proportions. Participation in the intervention group will be  
22 298  
23 reported by age groups, screening history, and sampling method (GP versus self-sampling). Regression  
24 299  
25 analyses will be used to estimate the association between CIN2+ detection in women offered cervical  
26 300  
27 cancer screening compared to those not offered screening. Both crude and adjusted estimates will be  
28  
29 301 presented with 95% confidence intervals (CIs). The cumulative incidence rates of cervical cancer among  
30  
31 302 women in the intervention and reference groups will be reported, including the distribution of the  
32  
33 303 histological types and FIGO stage of the detected cancers. All statistical analyses will be performed using  
34  
35 304 STATA version 16 (College Station, TX: StataCorp LP).  
36  
37

### 38 305 39 40 306 **Sample size**

41  
42 307 The sample size was determined by the primary outcome (CIN2+). In Denmark, approximately 167,000  
43  
44 308 Danish women are currently aged 65-69 years, 37,000 of whom (22,2%) reside in the CDR (intervention  
45  
46 309 group) (20). We anticipate that an estimated 55% of these will not have a record of a cervical cytology  
47  
48 310 sample in the DPDB within the past five years. As follows, the study cohort will consist of a total of 91,850  
49  
50 311 women, including approximately 20,000 women in the intervention group. We assume that 50% of the  
51  
52 312 eligible women in the intervention group will accept the screening offer and that the proportion of CIN2+ is  
53  
54 313 0.3% among participants. Thus, by including 10,000 women in the intervention group, the study will have a  
55  
56 314 power of 80% to detect a difference in the CIN2+ proportion of 0.1 percentage points between the  
57  
58  
59  
60

1  
2  
3  
4  
5  
6  
7  
8  
9  
10  
11  
12  
13  
14  
15  
16  
17  
18  
19  
20  
21  
22  
23  
24  
25  
26  
27  
28  
29  
30  
31  
32  
33  
34  
35  
36  
37  
38  
39  
40  
41  
42  
43  
44  
45  
46  
47  
48  
49  
50  
51  
52  
53  
54  
55  
56  
57  
58  
59  
60

315 intervention and reference group. The proportion of CIN2+ that was chosen (0.3%) is a conservative  
316 estimate inspired by Swedish data reporting a CIN2+ proportion of 0.38% among 56-60-year-old women  
317 attending HPV-based screening using the Cobas 4800 test (48).

## Timeline

318 The study enrollment is expected to continue until 10,000 participants have been included in the  
319 intervention group. Invitations will be sent out prospectively over an expected 2.5 year-period starting  
320 April 2019.

## PATIENT AND PUBLIC INVOLVEMENT

323 The research questions were developed in response to the on-going public and scientific discussion in  
324 Denmark regarding expanding the upper screening age in the organized cervical cancer screening program.  
325 No patients or patient organizations were involved in the development, design, or implementation of this  
326 study.

## ETHICS AND DISSEMINATION

### Ethics

329 According to the EU's General Data Protection Regulation, the project was listed at the record of processing  
330 activities for research projects in the CDR (j. no: 1-16-02-158-18). The study was approved by the Danish  
331 Patient Safety Authority (j.no: 3-3013-2634/1). The study protocol has been submitted to the Ethical  
332 Committee in the CDR. The Committee decided that according to the Consolidation Act on Research Ethics  
333 Review of Health Research Projects, Consolidation Act number 1083 of 15 September 2017 section 2 (1),  
334 this study is not notifiable to the Committee (j.no.: 73/2018) and informed consent is therefore not  
335 required.

1  
2  
3  
4  
5  
6  
7  
8  
9  
10  
11  
12  
13  
14  
15  
16  
17  
18  
19  
20  
21  
22  
23  
24  
25  
26  
27  
28  
29  
30  
31  
32  
33  
34  
35  
36  
37  
38  
39  
40  
41  
42  
43  
44  
45  
46  
47  
48  
49  
50  
51  
52  
53  
54  
55  
56  
57  
58  
59  
60

#### 337 **Dissemination**

338 The study protocol is registered at ClinicalTrials.gov (NCT04114968) and is made public in this protocol  
339 article. The results will be reported through publication of peer-reviewed articles in international scientific  
340 journals and presented at national and international scientific meetings. Moreover, the study results will be  
341 disseminated to healthcare stakeholders, and patient organizations at scientific meetings, and to the  
342 general public through press releases.

For peer review only

1  
2  
3  
4  
5  
6  
7  
8  
9  
10  
11  
12  
13  
14  
15  
16  
17  
18  
19  
20  
21  
22  
23  
24  
25  
26  
27  
28  
29  
30  
31  
32  
33  
34  
35  
36  
37  
38  
39  
40  
41  
42  
43  
44  
45  
46  
47  
48  
49  
50  
51  
52  
53  
54  
55  
56  
57  
58  
59  
60

## 344 **STRENGTHS AND LIMITATIONS OF THIS STUDY**

345 To our knowledge, this prospective population-based intervention study will be the first to evaluate if HPV-  
346 based cervical cancer screening among older women aged 65-69 years results in an increased detection of  
347 CIN2+ cases as compared to women not offered screening. Importantly, this study will evaluate whether  
348 the potential harms of overtreatment in older women are outweighed by the potential benefits of  
349 decreasing the incidence of (pre)-cancer (2, 49). Overall, this knowledge will address important research  
350 gaps and guide future screening recommendations. Compared with previous studies which report, by  
351 necessity, only the effect of cytology screening at older ages (7, 21-24) it is of great value for future decision  
352 making that this study will be able to determine the effect of screening at older ages in women who have  
353 had an exit HPV-test (49). A key strength is that the effect of the screening intervention will be measured  
354 prospectively within an organized program. From an implementation point of view, this will provide reliable  
355 estimates of the expected participation rates if extending the upper screening age together with the  
356 possibility of self-sampling would become routine. We will identify outcomes from the nationwide DPDB  
357 which has highly valid records on all pathology specimens in Denmark (32), and the selection of study  
358 participants is population-based and determined by data from the invitation module; thus eliminating both  
359 information bias and selection problems. Important limitations should be mentioned. The lack of  
360 randomization gives rise to confounding of both known and unknown risk factors. Ideally, eligible women in  
361 all Danish regions should have been individually randomized to the intervention and reference group  
362 instead of being allocated to the groups based on their geographical location. Unfortunately, this was not  
363 feasible from an organizational point of view. Detection of invasive and advanced cervical cancer is the  
364 optimal outcome measure to evaluate the effect of screening at older ages (49), but given the relative rarity  
365 of cervical cancer in older women, the length of follow-up needed and the large sample size required, we  
366 chose CIN2+ and CIN3+ as the primary and secondary outcome, respectively.

367 Yet, it should be noted that the majority of CIN2 and CIN3 lesions detected after age 65 might not have

1  
2  
3  
4  
5  
6  
7  
8  
9  
10  
11  
12  
13  
14  
15  
16  
17  
18  
19  
20  
21  
22  
23  
24  
25  
26  
27  
28  
29  
30  
31  
32  
33  
34  
35  
36  
37  
38  
39  
40  
41  
42  
43  
44  
45  
46  
47  
48  
49  
50  
51  
52  
53  
54  
55  
56  
57  
58  
59  
60

368 sufficient time to progress to invasive cancer in the remaining lifespan (2). However, the inclusion of CIN2/3  
369 cases is justified by them being treatable endpoints in older non-reproductive women (45).

370

For peer review only

1  
2  
3  
4  
5  
6  
7  
8  
9  
10  
11  
12  
13  
14  
15  
16  
17  
18  
19  
20  
21  
22  
23  
24  
25  
26  
27  
28  
29  
30  
31  
32  
33  
34  
35  
36  
37  
38  
39  
40  
41  
42  
43  
44  
45  
46  
47  
48  
49  
50  
51  
52  
53  
54  
55  
56  
57  
58  
59  
60

371 **Trial status**

372 Ongoing.

373 **Acknowledgements:**

374 Not applicable.

375 **Contributors:**

376 MT is the principal investigator of the study and is responsible for conducting the study overall. BA and MT  
377 conceived the original idea. Subsequently, LKP, ME, AH, MBH and JB also contributed to the design of the  
378 study. JSJ especially contributed with comments on the laboratory part of the protocol, while LKP, JB, and  
379 AH have provided clinical advice on follow-up of women with abnormal results. MT is the first author and  
380 drafted the first version of this protocol article, which was subsequently further developed by all authors,  
381 who also reviewed and approved the final version.

382 **Funding:**

383 The study was funded by the Health Foundation. The funding body had no role in the design of the study  
384 and collection, analysis, and interpretation of the data and in writing the manuscript.

385 **Competing interests:**

386 Roche sponsors the Cobas HPV-DNA test kits and CINTec Plus test kits for the study. According to the  
387 contract between Roche and the Department of Public Health Programmes, Randers Regional Hospital,  
388 Roche has commented on the protocol article, but had no influence on the scientific process and no  
389 editorial rights pertaining to this manuscript. The authors retained the right to submit the manuscript. MT,  
390 JB, JSJ and BA have participated in other studies with HPV test kits sponsored by Roche and self-sampling  
391 devices sponsored by Axlabs. MT has received honoraria from Roche Diagnostics and AstraZeneca for  
392 lectures on HPV self-sampling and HPV triage-methods, respectively. AH has received lecture fees from  
393 AstraZeneca. All authors declare no conflicts of interest.

1  
2  
3  
4 394 **Patient consent:**

5  
6  
7 395 Not required

8  
9 396 **Ethics approval:**

10  
11 397 The study protocol has been submitted to the Ethical Committee which deemed that the study was not  
12  
13 398 notifiable to the Committee and informed consent is therefore not required.

14  
15  
16  
17 399 **Provenance and peer review:**

18  
19 400 Not commissioned; externally peer-reviewed.

20  
21  
22 401

23  
24  
25  
26  
27  
28  
29  
30  
31  
32  
33  
34  
35  
36  
37  
38  
39  
40  
41  
42  
43  
44  
45  
46  
47  
48  
49  
50  
51  
52  
53  
54  
55  
56  
57  
58  
59  
60

For peer review only



1  
2  
3  
4  
5  
6  
7  
8  
9  
10  
11  
12  
13  
14  
15  
16  
17  
18  
19  
20  
21  
22  
23  
24  
25  
26  
27  
28  
29  
30  
31  
32  
33  
34  
35  
36  
37  
38  
39  
40  
41  
42  
43  
44  
45  
46  
47  
48  
49  
50  
51  
52  
53  
54  
55  
56  
57  
58  
59  
60**REFERENCES**

1. Arbyn M, Anttila A, Jordan J, Ronco G, Schenck U, Segnan N, et al. European Guidelines for Quality Assurance in Cervical Cancer Screening. Second edition--summary document. *Ann Oncol*. 2010;21(3):448-58.
2. Saslow D, Solomon D, Lawson HW, Killackey M, Kulasingam SL, Cain J, et al. American Cancer Society, American Society for Colposcopy and Cervical Pathology, and American Society for Clinical Pathology screening guidelines for the prevention and early detection of cervical cancer. *Am J Clin Pathol*. 2012;137(4):516-42.
3. Anttila A, von Karsa L, Aasmaa A, Fender M, Patnick J, Rebolj M, et al. Cervical cancer screening policies and coverage in Europe. *European journal of cancer*. 2009;45(15):2649-58.
4. Rustagi AS, Kamineni A, Weiss NS. Point: cervical cancer screening guidelines should consider observational data on screening efficacy in older women. *Am J Epidemiol*. 2013;178(7):1020-2.
5. Isidean SD, Franco EL. Counterpoint: cervical cancer screening guidelines--approaching the golden age. *Am J Epidemiol*. 2013;178(7):1023-6; discussion 7.
6. Wang J, Andrae B, Sundstrom K, Ploner A, Strom P, Elfstrom KM, et al. Effectiveness of cervical screening after age 60 years according to screening history: Nationwide cohort study in Sweden. *PLoS Med*. 2017;14(10):e1002414.
7. Castanon A, Landy R, Cuzick J, Sasieni P. Cervical screening at age 50-64 years and the risk of cervical cancer at age 65 years and older: population-based case control study. *PLoS Med*. 2014;11(1):e1001585.
8. Gyllensten U, Gustavsson I, Lindell M, Wilander E. Primary high-risk HPV screening for cervical cancer in post-menopausal women. *Gynecol Oncol*. 2012;125(2):343-5.
9. Engholm G, Ferlay J, Christensen N, Bray F, Gjerstorff ML, Klint Å, et al. NordCAN—a Nordic tool for cancer information, planning, quality control and research. *Acta Oncologica*. 2010;49(5):725-36.
10. Sherman SM, Castanon A, Moss E, Redman CW. Cervical cancer is not just a young woman's disease. *BMJ*. 2015;350:h2729.
11. Darlin L, Borgfeldt C, Widen E, Kannisto P. Elderly women above screening age diagnosed with cervical cancer have a worse prognosis. *Anticancer Res*. 2014;34(9):5147-51.
12. Hammer A, Kahlert J, Gravitt PE, Rositch AF. Hysterectomy-corrected cervical cancer mortality rates in Denmark during 2002-2015: A registry-based cohort study. *Acta Obstet Gynecol Scand*. 2019;98(8):1063-9.
13. Gravitt PE. Evidence and impact of human papillomavirus latency. *Open Virol J*. 2012;6:198-203.
14. Maglennon GA, Doorbar J. The biology of papillomavirus latency. *Open Virol J*. 2012;6:190-7.
15. Maglennon GA, McIntosh PB, Doorbar J. Immunosuppression facilitates the reactivation of latent papillomavirus infections. *J Virol*. 2014;88(1):710-6.

1  
2  
3  
4  
5  
6  
7  
8  
9  
10  
11  
12  
13  
14  
15  
16  
17  
18  
19  
20  
21  
22  
23  
24  
25  
26  
27  
28  
29  
30  
31  
32  
33  
34  
35  
36  
37  
38  
39  
40  
41  
42  
43  
44  
45  
46  
47  
48  
49  
50  
51  
52  
53  
54  
55  
56  
57  
58  
59  
60

16. Hammer A, de Koning MN, Blaakaer J, Steiniche T, Doorbar J, Griffin H, et al. Whole tissue cervical mapping of HPV infection: Molecular evidence for focal latent HPV infection in humans. *Papillomavirus Res.* 2019;7:82-7.
17. Andersen B, Christensen BS, Christensen J, Ejersbo D, Heje HN, Jochumsen KM, et al. HPV-prevalence in elderly women in Denmark. *Gynecol Oncol.* 2019;154(1):118-23.
18. Lynge E, Lönnberg S, Törnberg S. Cervical cancer incidence in elderly women-biology or screening history? *European journal of cancer.* 2017;74:82-8.
19. Elit L. Role of cervical screening in older women. *Maturitas.* 2014;79(4):413-20.
20. Statistics Denmark. Statistik databanken 2020 [cited 2020 15 January]. Available from: [www.statistikbanken.dk](http://www.statistikbanken.dk).
21. Andrae B, Kemetli L, Sparen P, Silfverdal L, Strander B, Ryd W, et al. Screening-preventable cervical cancer risks: evidence from a nationwide audit in Sweden. *Journal of the National Cancer Institute.* 2008;100(9):622-9.
22. Rosenblatt KA, Osterbur EF, Douglas JA. Case-control study of cervical cancer and gynecologic screening: A SEER-Medicare analysis. *Gynecol Oncol.* 2016;142(3):395-400.
23. Kamineni A, Weinmann S, Shy KK, Glass AG, Weiss NS. Efficacy of screening in preventing cervical cancer among older women. *Cancer Causes Control.* 2013;24(9):1653-60.
24. Rustagi AS, Kamineni A, Weinmann S, Reed SD, Newcomb P, Weiss NS. Cervical screening and cervical cancer death among older women: a population-based, case-control study. *Am J Epidemiol.* 2014;179(9):1107-14.
25. Hammer A, Soegaard V, Maimburg RD, Blaakaer J. Cervical cancer screening history prior to a diagnosis of cervical cancer in Danish women aged 60 years and older-A national cohort study. *Cancer Med.* 2019;8(1):418-27.
26. Nelson EJ, Maynard BR, Loux T, Fatla J, Gordon R, Arnold LD. The acceptability of self-sampled screening for HPV DNA: a systematic review and meta-analysis. *Sexually transmitted infections.* 2017;93(1):56-61.
27. Arbyn M, Smith SB, Temin S, Sultana F, Castle P. Detecting cervical precancer and reaching underscreened women by using HPV testing on self samples: updated meta-analyses. *Bmj.* 2018;363:k4823.
28. Lynge E, Clausen LB, Guignard R, Poll P. What happens when organization of cervical cancer screening is delayed or stopped? *Journal of medical screening.* 2006;13(1):41-6.
29. Lynge E, Rygaard C, Baillet MVP, Dugué PA, Sander BB, Bonde J, et al. Cervical cancer screening at crossroads. *Apmis.* 2014;122(8):667-73.
30. Danish Health Authority. Screening for livmoderhalskræft-anbefalinger 2012 [In English: Cervical cancer screening-recommendations 2012]. Copenhagen [in Danish with English summary] 2012 [Available from: <https://www.sst.dk/~media/B1211EAFEDFB47C5822E883205F99B79.ashx>].

- 1  
2  
3  
4 469 31.Lyng E, Andersen B, Christensen J, Ejersbo D, Jochumsen K, Johansen T, et al. Cervical screening in  
5 470 Denmark—a success followed by stagnation. *Acta Oncologica*. 2017;1-8.  
7  
8 471 32.Erichsen R, Lash TL, Hamilton-Dutoit SJ, Bjerregaard B, Vyberg M, Pedersen L. Existing data sources for  
9 472 clinical epidemiology: the Danish National Pathology Registry and Data Bank. *Clinical epidemiology*.  
10 473 2010;2:51-6.  
11  
12 474 33.Bjerregaard B, Larsen OB. The Danish Pathology Register. *Scandinavian Journal of Public Health*.  
13 475 2011;39(7 Suppl):72-4.  
15  
16 476 34.Schmidt M, Pedersen L, Sørensen HT. The Danish Civil Registration System as a tool in epidemiology.  
17 477 *European journal of epidemiology*. 2014;29(8):541-9.  
18  
19 478 35.Barnighausen T, Tugwell P, Rottingen JA, Shemilt I, Rockers P, Geldsetzer P, et al. Quasi-experimental  
20 479 study designs series-paper 4: uses and value. *J Clin Epidemiol*. 2017;89:21-9.  
22  
23 480 36.Schmidt M, Schmidt SA, Sandegaard JL, Ehrenstein V, Pedersen L, Sorensen HT. The Danish National  
24 481 Patient Registry: a review of content, data quality, and research potential. *Clin Epidemiol*. 2015;7:449-90.  
25  
26 482 37.The Danish Agency for Digitisation. About NemID. 2020 [Available from: [https://www.nemid.nu/dk-](https://www.nemid.nu/dk-en/about_nemid/)  
27 483 [en/about\\_nemid/](https://www.nemid.nu/dk-en/about_nemid/).  
29  
30 484 38.Pedersen KM, Andersen JS, Sondergaard J. General practice and primary health care in Denmark. *Journal*  
31 485 *of the American Board of Family Medicine : JABFM*. 2012;25 Suppl 1:S34-8.  
32  
33 486 39.van Baars R, Bosgraaf RP, ter Harmsel BW, Melchers WJ, Quint WG, Bekkers RL. Dry storage and  
34 487 transport of a cervicovaginal self-sample by use of the Evalyn Brush, providing reliable human  
35 488 papillomavirus detection combined with comfort for women. *Journal of clinical microbiology*.  
36 489 2012;50(12):3937-43.  
38  
39 490 40.Tranberg M, Bech BH, Blaakær J, Jensen JS, Svanholm H, Andersen B. Study protocol of the CHOICE trial:  
40 491 a three-armed, randomized, controlled trial of home-based HPV self-sampling for non-participants in an  
41 492 organized cervical cancer screening program. *BMC cancer*. 2016;16(1):835.  
43  
44 493 41.Tranberg M, Bech BH, Blaakær J, Jensen JS, Svanholm H, Andersen B. Preventing cervical cancer using  
45 494 HPV self-sampling: direct mailing of test-kits increases screening participation more than timely opt-in  
46 495 procedures-a randomized controlled trial. *BMC cancer*. 2018;18(1):273.  
48  
49 496 42.Tranberg M, Jensen JS, Bech BH, Blaakaer J, Svanholm H, Andersen B. Good concordance of HPV  
50 497 detection between cervico-vaginal self-samples and general practitioner-collected samples using the Cobas  
51 498 4800 HPV DNA test. *Bmc Infectious Diseases*. 2018;18.  
52  
53 499 43.Heideman DA, Hesselink AT, Berkhof J, van Kemenade F, Melchers WJ, Daalmeijer NF, et al. Clinical  
54 500 validation of the cobas 4800 HPV test for cervical screening purposes. *Journal of clinical microbiology*.  
55 501 2011;49(11):3983-5.  
57  
58  
59  
60

1  
2  
3  
4  
5  
6  
7  
8  
9  
10  
11  
12  
13  
14  
15  
16  
17  
18  
19  
20  
21  
22  
23  
24  
25  
26  
27  
28  
29  
30  
31  
32  
33  
34  
35  
36  
37  
38  
39  
40  
41  
42  
43  
44  
45  
46  
47  
48  
49  
50  
51  
52  
53  
54  
55  
56  
57  
58  
59  
60

502 44.Rao A, Young S, Erlich H, Boyle S, Krevolin M, Sun R, et al. Development and characterization of the  
503 cobas human papillomavirus test. *Journal of clinical microbiology*. 2013;51(5):1478-84.

504 45.Petersen LK. National Clinical Guideline for Cervical dysplasia. Examination, treatment, and management  
505 of women aged 60 and older [Only in Danish]: DSOG; 2019 [Available from: [https://www.sst.dk/-/media/Opgaver/Patientforl%C3%B8b-og-kvalitet/NKR/Puljefinansierede-NKR/pdf-version-af-published\\_guideline\\_2633.ashx?la=da&hash=0809DD9A773B341B3D08AE73C9361E2AB84029E8](https://www.sst.dk/-/media/Opgaver/Patientforl%C3%B8b-og-kvalitet/NKR/Puljefinansierede-NKR/pdf-version-af-published_guideline_2633.ashx?la=da&hash=0809DD9A773B341B3D08AE73C9361E2AB84029E8)].

508 46.Petersen LK. Examination, treatment and control of cervical dysplasia [Only in Danish]: 2013: DSOG;  
509 2013 [Available from: <http://gynobsguideline.dk/hindsgavl/Cervixdysplasi2012.pdf>].

510 47.Gustafson LW HA, Petersen LK , Andersen B, Bor P. "See and Treat" in an outpatient setting in women  
511 above 45 years with cervical dysplasia. For study protocol. See Clinicaltrials.gov. NCT:04298957. 2020.

512 48.Sahlgren H, Elfstrom KM, Lamin H, Carlsten-Thor A, Eklund C, Dillner J, et al. Colposcopic and  
513 histopathologic evaluation of women with HPV persistence exiting an organized screening program. *Am J  
514 Obstet Gynecol*. 2020;222(3):253 e1- e8.

515 49.Gravitt PE, Landy R, Schiffman M. How confident can we be in the current guidelines for exiting cervical  
516 screening? *Prev Med*. 2018;114:188-92.

517 50.Gjerstorff ML. The Danish Cancer Registry. *Scand J Public Health*. 2011;39(7 Suppl):42-5.

518 51.Thygesen LC, Daasnes C, Thaulow I, Bronnum-Hansen H. Introduction to Danish (nationwide) registers  
519 on health and social issues: structure, access, legislation, and archiving. *Scand J Public Health*. 2011;39(7  
520 Suppl):12-6.

1  
2  
3  
4  
5  
6  
7  
8  
9  
10  
11  
12  
13  
14  
15  
16  
17  
18  
19  
20  
21  
22  
23  
24  
25  
26  
27  
28  
29  
30  
31  
32  
33  
34  
35  
36  
37  
38  
39  
40  
41  
42  
43  
44  
45  
46  
47  
48  
49  
50  
51  
52  
53  
54  
55  
56  
57  
58  
59  
60

522 **Table 1: Overview over data sources and information**

| <b>Data sources</b>                          | <b>Information</b>                                                                                                                                                                                                                                                                                                                |
|----------------------------------------------|-----------------------------------------------------------------------------------------------------------------------------------------------------------------------------------------------------------------------------------------------------------------------------------------------------------------------------------|
| <b>Danish Pathology Data Bank (32)</b>       | Participation (yes/no)<br><br>Participation by self-sampling or GP-based screening<br><br>Cervical cytology samples in references regions<br><br>Results of self-samples, cervical cytology samples and cervical biopsies<br><br>Cervical biopsy performed (yes/no)<br><br>Conization performed (yes/no)<br><br>Screening history |
| <b>Danish Civil Registration System (34)</b> | Residence<br><br>Date of death, emigration and immigration                                                                                                                                                                                                                                                                        |
| <b>Danish National Patient Register (36)</b> | Total hysterectomy and cervical amputation procedures                                                                                                                                                                                                                                                                             |
| <b>Danish Cancer Registry (50)</b>           | Cervical cancer incidence                                                                                                                                                                                                                                                                                                         |
| <b>Statistics Denmark (51)</b>               | Sociodemographic factors (e.g. age, marital status and education level)                                                                                                                                                                                                                                                           |

523 Table notes: GP: General Practitioner.

Figure 1: Map of the intervention and reference regions

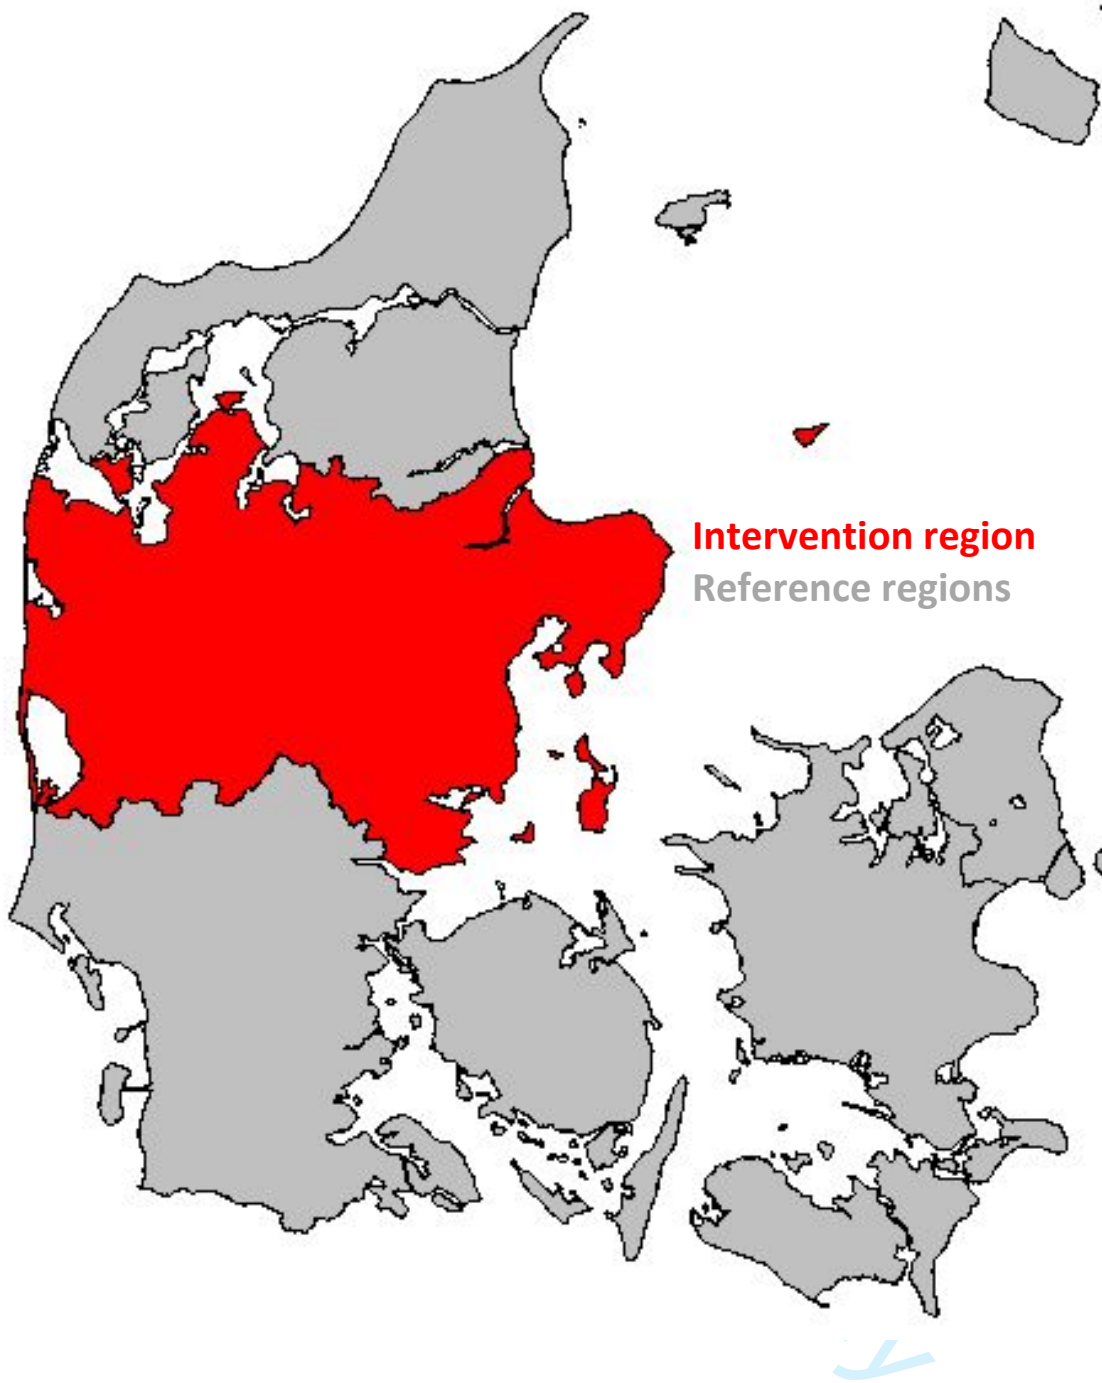

1  
2  
3  
4  
5  
6  
7  
8  
9  
10  
11  
12  
13  
14  
15  
16  
17  
18  
19  
20  
21  
22  
23  
24  
25  
26  
27  
28  
29  
30  
31  
32  
33  
34  
35  
36  
37  
38  
39  
40  
41  
42  
43  
44  
45  
46  
47  
48  
49  
50  
51  
52  
53  
54  
55  
56  
57  
58  
59  
60

**Figure 2: Clinical management of women attending screening at a GP**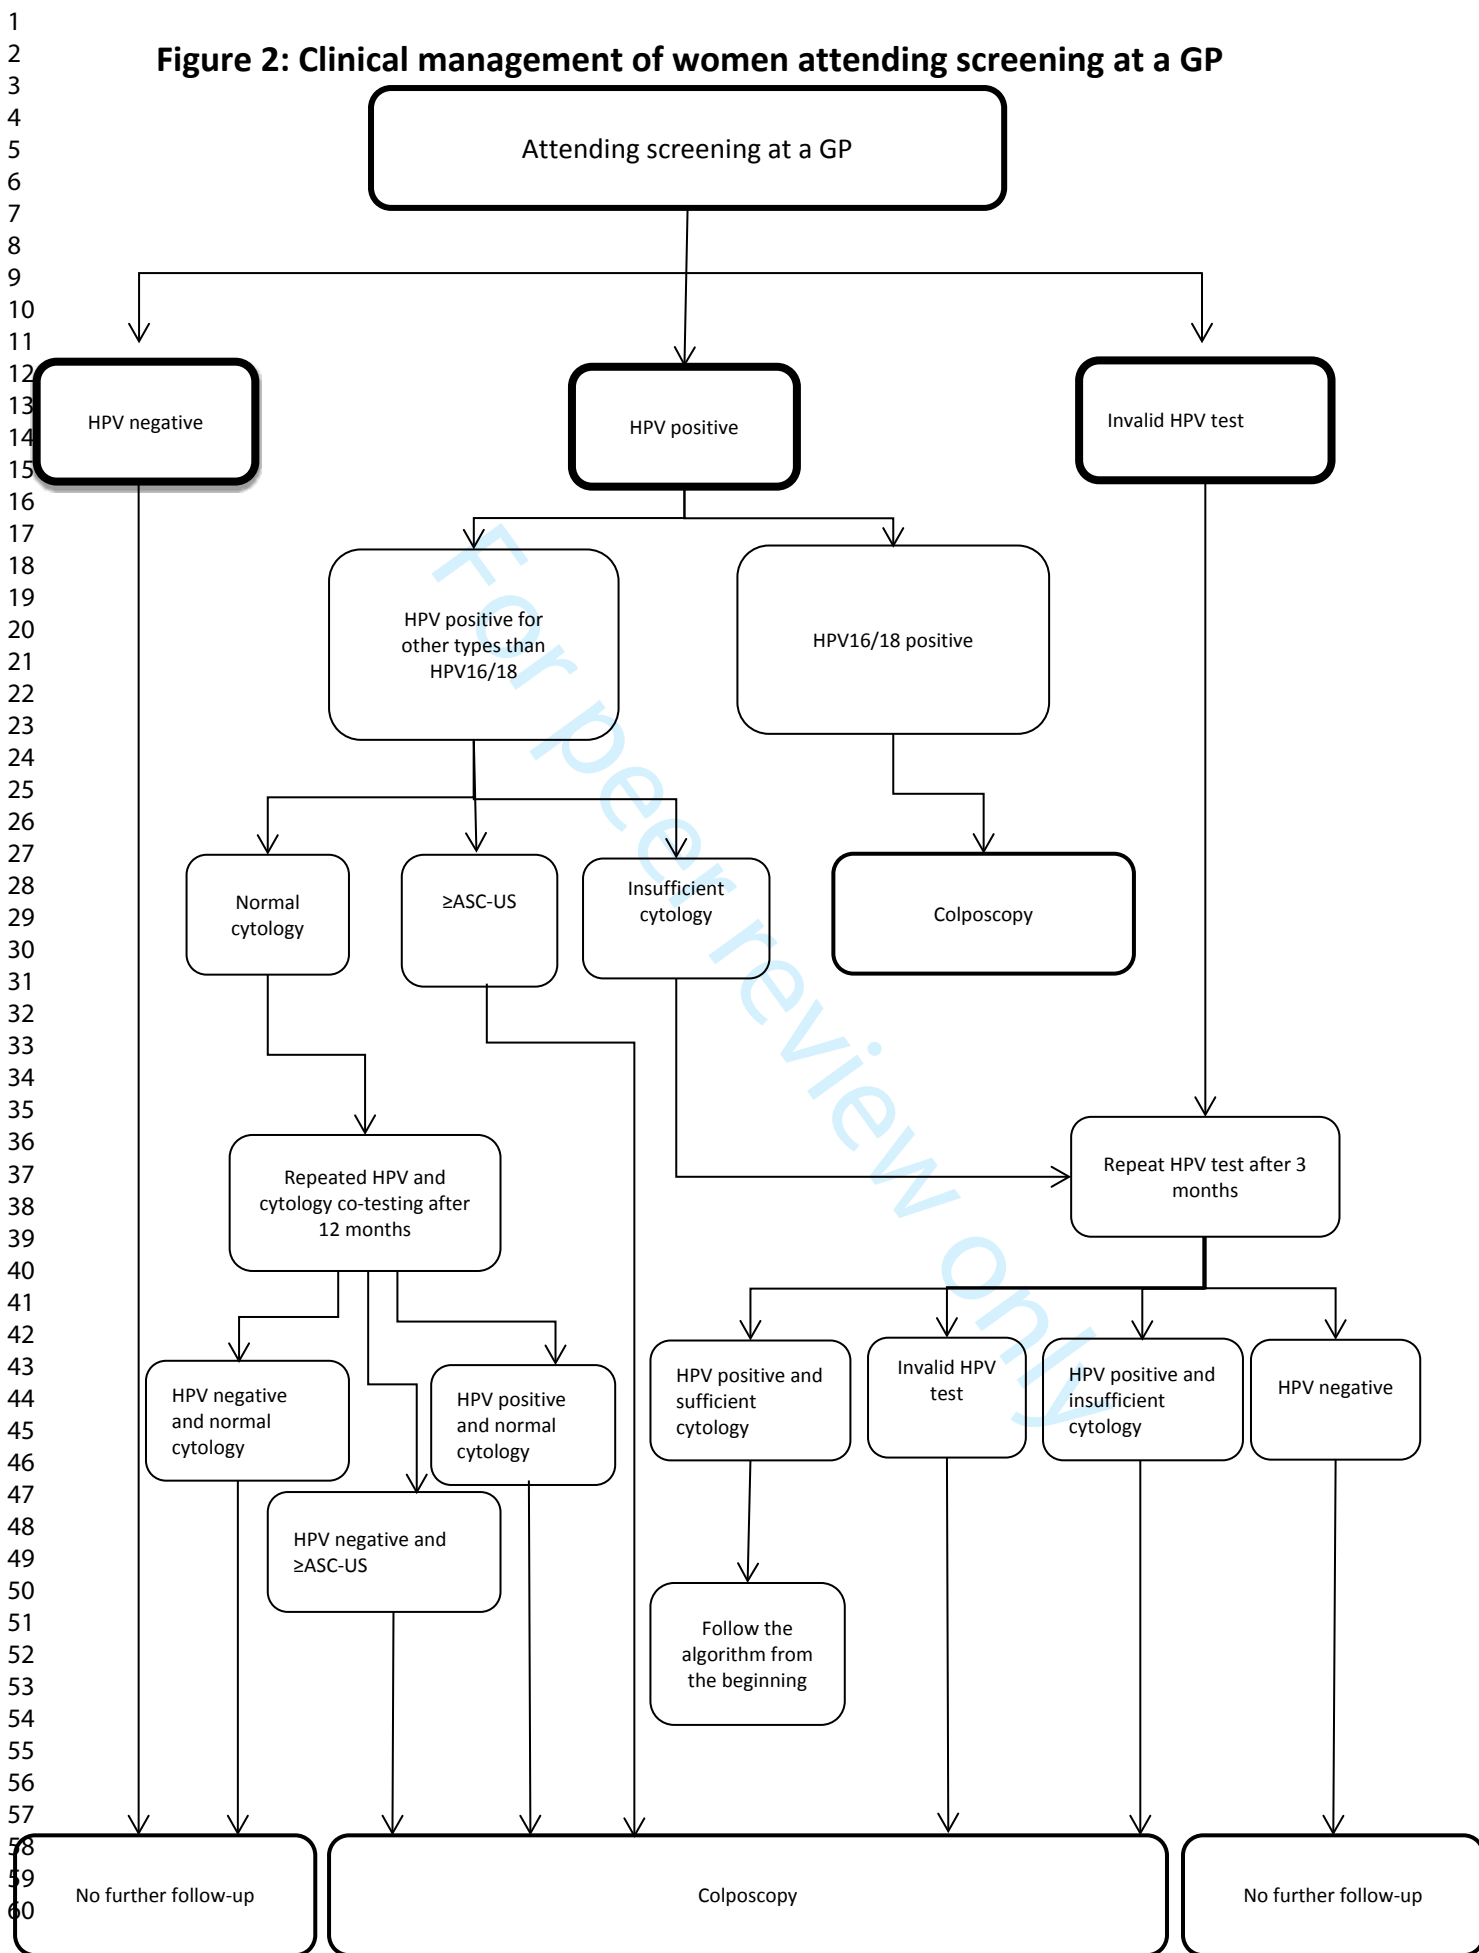



Figure :3 Clinical management of women attending HPV self-sampling

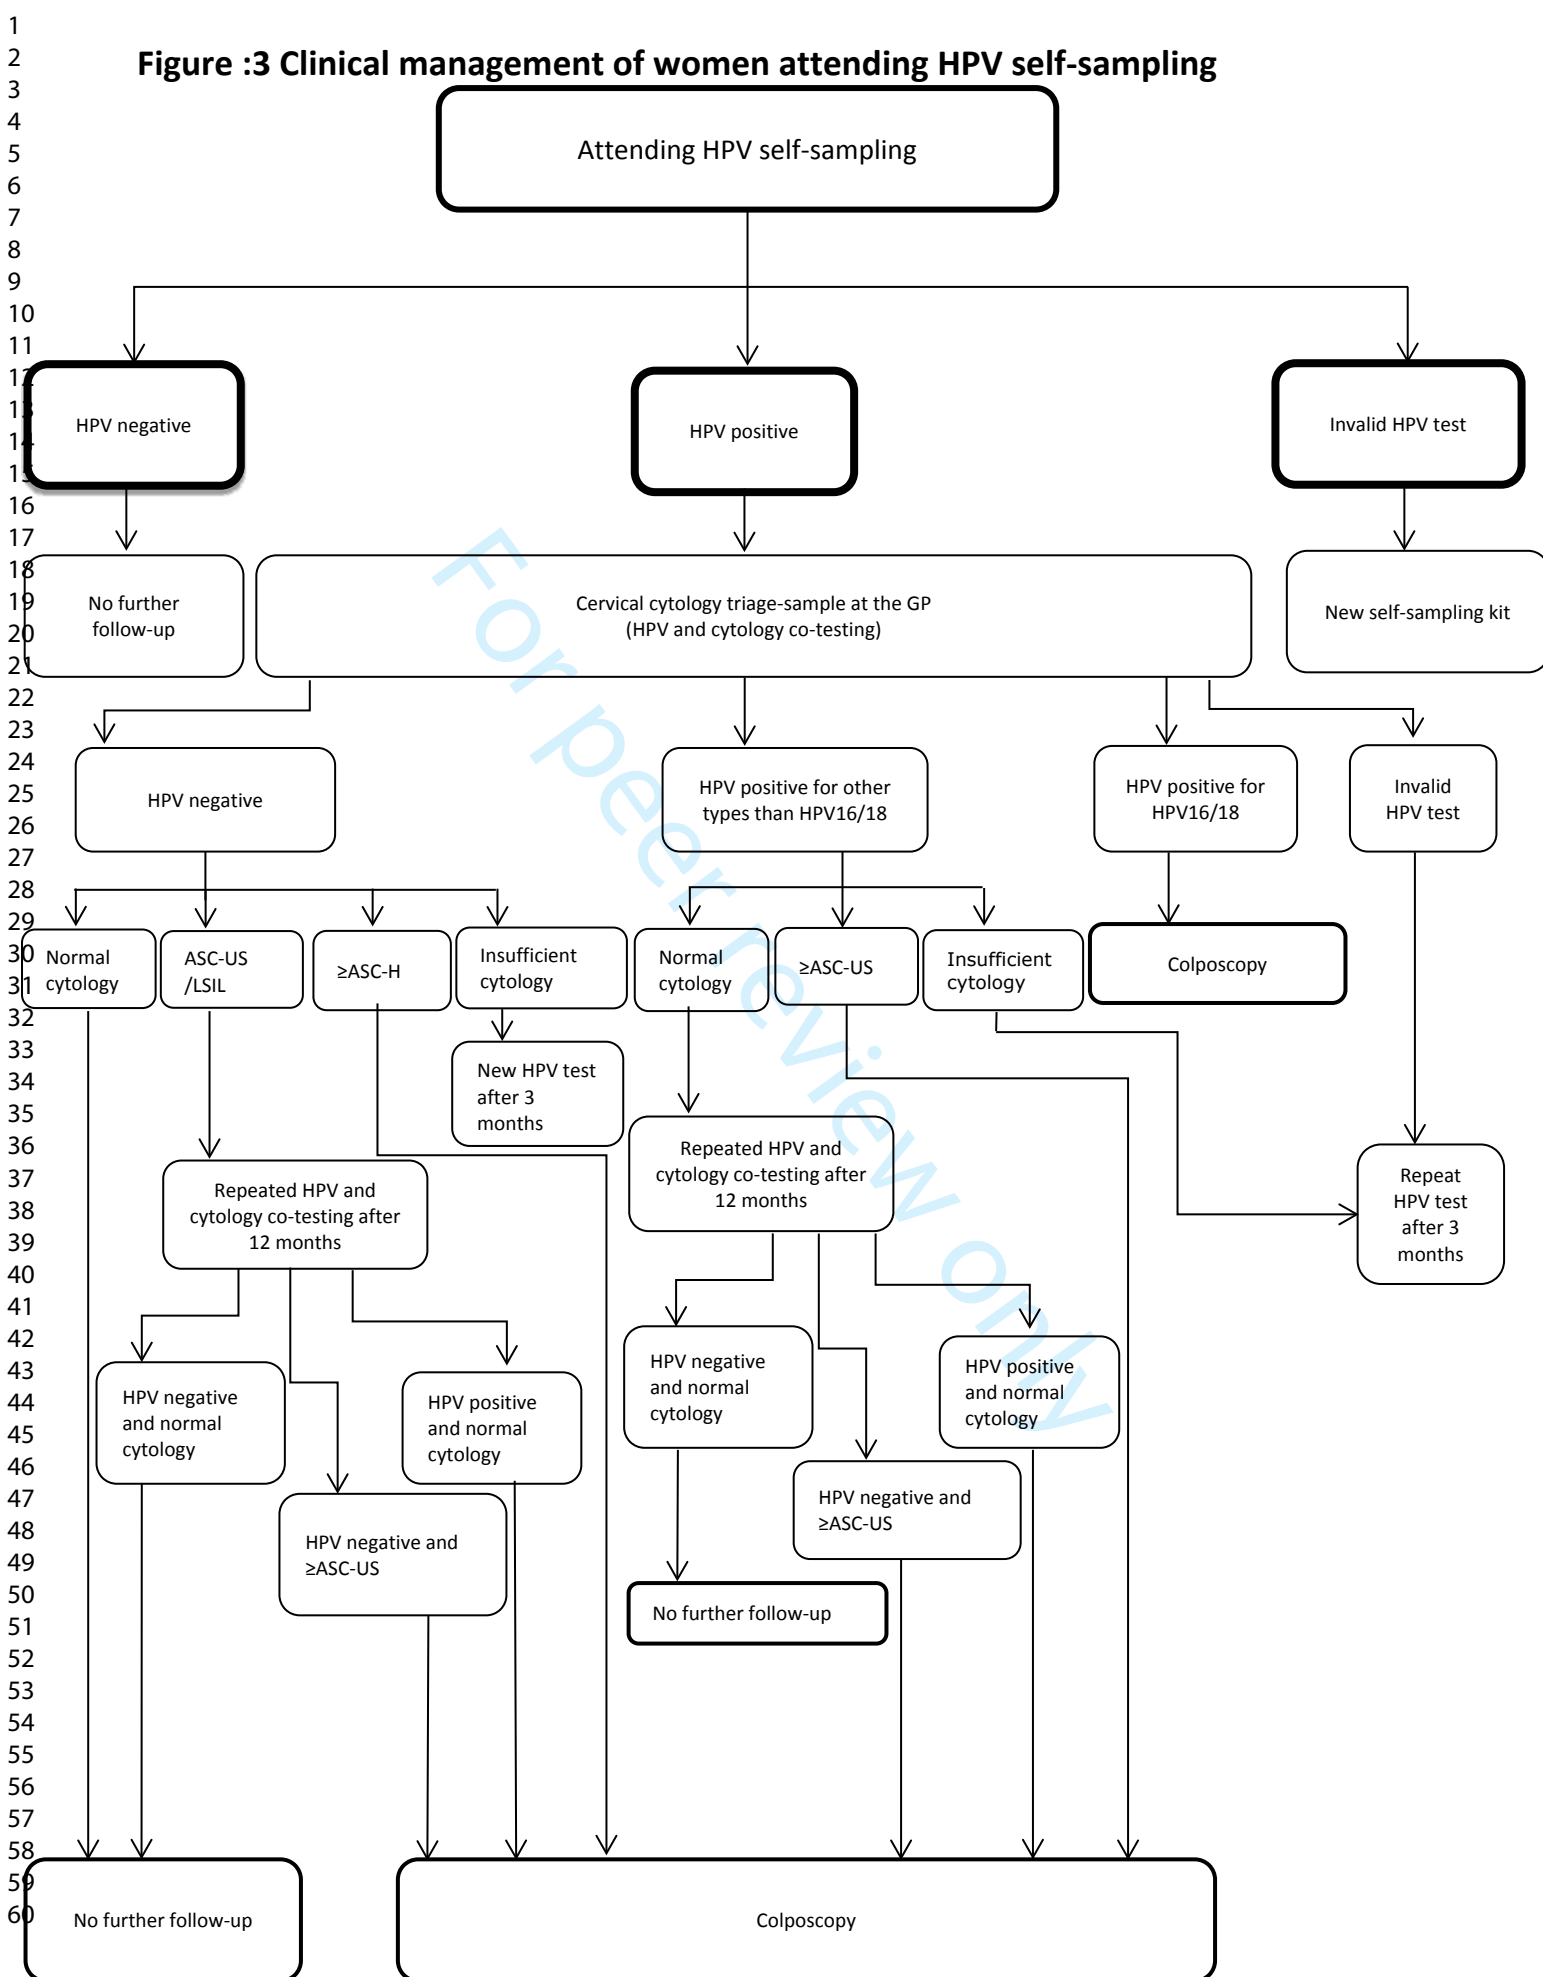

Figure notes: GP: General practitioner. HPV: Human Papillomavirus. HPV other types than HPV16/18: 31,33,35,39,45,51,52, 56,58,59,66 and 68. ≥ASC-US include: Atypical Squamous Cells of Undetermined Significance (ASC-US); Low-grade Squamous Intraepithelial Lesion (LSIL); Atypical Squamous Cells cannot exclude HSIL (ASC-H); High-grade Squamous Intraepithelial Lesion (HSIL); Squamous Cell Carcinoma (SCC); Atypical Glandular Cells (AGC), Adenocarcinoma In Situ (AIS); Adenocarcinoma (ACC) and malignant tumor cells. ≥ASC-H include: ASC-H, HSIL, SCC, AGC, AIS, ACC, and malignant tumor cells.



1  
2  
3  
4  
5  
6  
7  
8  
9  
10  
11  
12  
13  
14  
15  
16  
17  
18  
19  
20  
21  
22  
23  
24  
25  
26  
27  
28  
29  
30  
31  
32  
33  
34  
35  
36  
37  
38  
39  
40  
41  
42  
43  
44  
45  
46  
47  
48  
49  
50  
51  
52  
53  
54  
55  
56  
57  
58  
59  
60

For peer review only

# BMJ Open

## EXPANDING THE UPPER AGE LIMIT FOR CERVICAL CANCER SCREENING: A PROTOCOL FOR A NATIONWIDE NON-RANDOMIZED INTERVENTION STUDY

|                                 |                                                                                                                                                                                                                                                                                                                                                                                                                                                                                                                                                                                                                                                                                                                                                                                                                                                                                                                                               |
|---------------------------------|-----------------------------------------------------------------------------------------------------------------------------------------------------------------------------------------------------------------------------------------------------------------------------------------------------------------------------------------------------------------------------------------------------------------------------------------------------------------------------------------------------------------------------------------------------------------------------------------------------------------------------------------------------------------------------------------------------------------------------------------------------------------------------------------------------------------------------------------------------------------------------------------------------------------------------------------------|
| Journal:                        | <i>BMJ Open</i>                                                                                                                                                                                                                                                                                                                                                                                                                                                                                                                                                                                                                                                                                                                                                                                                                                                                                                                               |
| Manuscript ID                   | bmjopen-2020-039636.R1                                                                                                                                                                                                                                                                                                                                                                                                                                                                                                                                                                                                                                                                                                                                                                                                                                                                                                                        |
| Article Type:                   | Protocol                                                                                                                                                                                                                                                                                                                                                                                                                                                                                                                                                                                                                                                                                                                                                                                                                                                                                                                                      |
| Date Submitted by the Author:   | 14-Jul-2020                                                                                                                                                                                                                                                                                                                                                                                                                                                                                                                                                                                                                                                                                                                                                                                                                                                                                                                                   |
| Complete List of Authors:       | tranberg, mette; Regional Hospital Randers, Department of Public Health Programmes<br>Petersen, Lone; Odense University Hospital, Department of Obstetrics and Gynecology; University of Southern Denmark, OPEN, Department of Clinical Medicine<br>Elfström, Klara; Karolinska Institutet, Dept of Laboratory Medicine; Regional Cancer Center, Cancer Screening Unit<br>Hammer, Anne ; Aarhus University, Department of Clinical Medicine; Regionshospitalet Herning, Department of Obstetrics and Gynecology<br>Blaakær, Jan; University of Southern Denmark, OPEN, Department of Clinical Medicine; Odense University Hospital, Department of Obstetrics and Gynecology<br>Bennetsen, Mary; Regional Hospital Randers, Department of Pathology<br>Jensen, Jørgen; Statens Serum Institut, Mycoplasma Laboratory<br>Andersen, Berit; Randers Regional Hospital, Public Health Programs; Aarhus University, Department of Clinical Medicine |
| <b>Primary Subject Heading</b>: | Public health                                                                                                                                                                                                                                                                                                                                                                                                                                                                                                                                                                                                                                                                                                                                                                                                                                                                                                                                 |
| Secondary Subject Heading:      | Epidemiology, Obstetrics and gynaecology                                                                                                                                                                                                                                                                                                                                                                                                                                                                                                                                                                                                                                                                                                                                                                                                                                                                                                      |
| Keywords:                       | EPIDEMIOLOGY, Cytopathology < PATHOLOGY, PREVENTIVE MEDICINE, PUBLIC HEALTH, GYNAECOLOGY                                                                                                                                                                                                                                                                                                                                                                                                                                                                                                                                                                                                                                                                                                                                                                                                                                                      |
|                                 |                                                                                                                                                                                                                                                                                                                                                                                                                                                                                                                                                                                                                                                                                                                                                                                                                                                                                                                                               |

SCHOLARONE™  
Manuscripts



I, the Submitting Author has the right to grant and does grant on behalf of all authors of the Work (as defined in the below author licence), an exclusive licence and/or a non-exclusive licence for contributions from authors who are: i) UK Crown employees; ii) where BMJ has agreed a CC-BY licence shall apply, and/or iii) in accordance with the terms applicable for US Federal Government officers or employees acting as part of their official duties; on a worldwide, perpetual, irrevocable, royalty-free basis to BMJ Publishing Group Ltd ("BMJ") its licensees and where the relevant Journal is co-owned by BMJ to the co-owners of the Journal, to publish the Work in this journal and any other BMJ products and to exploit all rights, as set out in our [licence](#).

The Submitting Author accepts and understands that any supply made under these terms is made by BMJ to the Submitting Author unless you are acting as an employee on behalf of your employer or a postgraduate student of an affiliated institution which is paying any applicable article publishing charge ("APC") for Open Access articles. Where the Submitting Author wishes to make the Work available on an Open Access basis (and intends to pay the relevant APC), the terms of reuse of such Open Access shall be governed by a Creative Commons licence – details of these licences and which [Creative Commons](#) licence will apply to this Work are set out in our licence referred to above.

Other than as permitted in any relevant BMJ Author's Self Archiving Policies, I confirm this Work has not been accepted for publication elsewhere, is not being considered for publication elsewhere and does not duplicate material already published. I confirm all authors consent to publication of this Work and authorise the granting of this licence.

# EXPANDING THE UPPER AGE LIMIT FOR CERVICAL CANCER SCREENING: A PROTOCOL FOR A NATIONWIDE NON-RANDOMIZED INTERVENTION

## STUDY

Mette Tranberg<sup>1\*</sup>, PhD, MSch.

Lone Kjeld Petersen<sup>2,3</sup>, MD, DMSc., Professor

K. Miriam Elfström<sup>4,5</sup>, PhD, MPH

Anne Hammer<sup>6,7</sup>, MD, PhD, Associate professor

Jan Blaakær<sup>2,3</sup>, MD, DMSc., Professor

Mary Holten Bennetsen<sup>8</sup>, MD

Jørgen Skov Jensen<sup>9</sup> MD, PhD, DMSc.,

Berit Andersen<sup>1,6</sup> MD, PhD, Professor

### Affiliations:

1. Department of Public Health Programmes, Randers Regional Hospital, Randers Denmark

2. Department of Obstetrics and Gynecology, Odense University Hospital, Odense Denmark

3. OPEN, Department of Clinical Medicine, Southern University of Denmark, Odense, Denmark

4. Department of Laboratory Medicine, Karolinska Institute, Stockholm, Sweden

5. Regional Cancer Center of Stockholm-Gotland, Stockholm, Sweden

6. Department of Clinical Medicine, Aarhus University, Aarhus, Denmark

7. Department of Obstetrics and Gynecology, Herning Regional Hospital, Herning, Denmark

8. Department of Pathology, Randers Regional Hospital, Randers, Denmark

9. Research Unit for Reproductive Microbiology, Statens Serum Institut, Copenhagen, Denmark

### Corresponding author:

Mette Tranberg, Department of Public Health Programmes. Randers Regional Hospital, Skovlyvej 15, 8930 Randers

NO, Denmark E-mail: mettrani@rm.dk. Tel: (+45) 78 42 02 64. ORCID:0000-0002-6285-6694.

1  
2  
3  
4  
5  
6  
7  
8  
9  
10  
11  
12  
13  
14  
15  
16  
17  
18  
19  
20  
21  
22  
23  
24  
25  
26  
27  
28  
29  
30  
31  
32  
33  
34  
35  
36  
37  
38  
39  
40  
41  
42  
43  
44  
45  
46  
47  
48  
49  
50  
51  
52  
53  
54  
55  
56  
57  
58  
59  
60

33 **E-mails:** Lone Kjeld Petersen: Lone.Kjeld.Petersen@rsyd.dk; Miriam Elfström: miriam.elfstrom@ki.se; Anne Hammer:

34 ahlauridsen@clin.au.dk; Jan Blaakær: jab@dadlnet.dk; Mary Holten Bennetsen: maryha@rm.dk; Jørgen Skov Jensen:

35 jsj@ssi.dk; Berit Andersen: berand@rm.dk

36  
37 **Number of words in text:** 4,121

38  
39 **Number of words in abstract:** 324

40 **Number of figures:** 3

41 **Number of tables:** 2

42 **Number of references:** 54

43  
44 **Trial registration:** NCT04114968.

45  
46 **Keywords:** Mass screening, HPV DNA testing, older women, cervical cancer screening, cervical cancer

## 48 **ABSTRACT**

### 50 **Introduction**

51 Cervical cancer screening ceases between the ages of 60 and 65 in most countries. Yet, a relatively high  
52 proportion of cervical cancers are diagnosed in women above the screening age. This study will evaluate if  
53 screening of women aged 65-69 years may result in increased detection of cervical intraepithelial neoplasia  
54 grade 2 or worse (CIN2+) compared to women not invited to screening. Invited women may choose  
55 between general practitioner (GP)-based screening or cervico-vaginal self-sampling. Furthermore, the study  
56 will assess if self-sampling is superior to GP-based screening in reaching long-term unscreened women.

### 57 **Methods and Analysis**

58 This population-based non-randomized intervention study will include 10,000 women aged 65-69 years,  
59 with no record of a cervical cytology sample or screening invitation in the 5 years before inclusion. Women  
60 who have opted-out of the screening program or have a record of hysterectomy or cervical amputation are  
61 excluded. Women residing in the Central Denmark Region are allocated to the intervention group, while  
62 women residing in the remaining four Danish regions are allocated to the reference group.

63 The intervention group is invited for human papillomavirus (HPV)-based screening by attending routine  
64 screening at the GP or by requesting a self-sampling kit. The reference group receives standard care which  
65 is the opportunity to have a cervical cytology sample obtained at the GP or by a gynecologist. The study  
66 started in April 2019 and will run over the next 4.5 years.

67 The primary outcome will be the proportion of CIN2+ detected in the intervention and reference groups. In  
68 the intervention group, the proportion of long-term unscreened women attending GP-based screening or  
69 self-sampling will be compared.

### 70 **Ethics and dissemination**

71 The study has been submitted to the Ethical Committee in the Central Denmark Region which deemed that  
72 the study was not notifiable to the Committee and informed consent is therefore not required. The study is

1  
2  
3  
4  
5  
6  
7  
8  
9  
10  
11  
12  
13  
14  
15  
16  
17  
18  
19  
20  
21  
22  
23  
24  
25  
26  
27  
28  
29  
30  
31  
32  
33  
34  
35  
36  
37  
38  
39  
40  
41  
42  
43  
44  
45  
46  
47  
48  
49  
50  
51  
52  
53  
54  
55  
56  
57  
58  
59  
60

73 approved by the Danish Data Protection Regulation and the Danish Patient Safety Authority. Results will be  
74 disseminated in peer-reviewed journals.

75

For peer review only

## STRENGTHS AND LIMITATIONS OF THIS STUDY

- This population-based intervention study is the first to evaluate if expanding the upper screening age to include women aged 65-69-year and inviting them to choose between GP-based screening or self-sampling will result in increased detection of CIN2+ compared to existing practice (i.e. no screening).
- This study is the first to evaluate if self-sampling is superior to GP-based screening in reaching long-term unscreened women aged 65-69 years
- The risk of information bias and selection problems are minimized by using high-quality Danish registries and a population-based design
- The study design entails a risk of confounding due to the lack of randomization



1  
2  
3  
4  
5  
6  
7  
8  
9  
10  
11  
12  
13  
14  
15  
16  
17  
18  
19  
20  
21  
22  
23  
24  
25  
26  
27  
28  
29  
30  
31  
32  
33  
34  
35  
36  
37  
38  
39  
40  
41  
42  
43  
44  
45  
46  
47  
48  
49  
50  
51  
52  
53  
54  
55  
56  
57  
58  
59  
60

## 87 INTRODUCTION

88  
89 Cervical cancer screening ceases between the ages of 60 and 65 in most Western countries<sup>1-3</sup>. There is no  
90 solid evidence about which age and with which criteria to cease screening<sup>1,4-6</sup>, but the cessation of  
91 screening in older women is often justified by a low prevalence of high-risk human papillomavirus (HPV) in  
92 women  $\geq 55$  years<sup>7,8</sup> and by a concern that the harms of continuing screening may outweigh potential  
93 benefits<sup>2</sup>. Many countries with long-established screening programs, including Denmark, experience a  
94 second incidence peak of cervical cancer around the age of 75-80 years<sup>9,10</sup>, with a hysterectomy-corrected  
95 incidence rate of 29.4 per 100,000 person-years in women aged 75-79<sup>11</sup>. These older women are more  
96 often diagnosed with advanced-stage disease and mortality due to cervical cancer is high as compared to  
97 younger women<sup>12,13</sup>. It has been hypothesized that the incidence peak could be a result of a mid-life  
98 change of sexual partners or reactivation of a latent HPV infection as the immune system weakens with age  
99<sup>14-17</sup>. However, a recent Danish study of HPV DNA prevalence in women aged 69 and above showed no  
100 increase in prevalence that could explain the cervical cancer peak in this age group<sup>18</sup>. It has also been  
101 hypothesized that the current peak in older ages could be attributed to an insufficient screening history in  
102 older birth cohorts<sup>19</sup>. Whatever the reason, the increasing female life expectancy (at age 65 years it is  
103 about 20 additional years) has raised the question if the upper age limit for screening should be extended  
104 to 69 or 70 years<sup>10,20,21</sup>. Case-control studies have reported benefits of cervical cytology screening at older  
105 ages with respect to reduced incidence and mortality<sup>7,22-25</sup>, even among previously screened women<sup>4</sup>.  
106 However, a prospective evaluation of HPV-screening at ages 65-69 in a population-based intervention study  
107 including a reference group is missing.  
108 The effectiveness of cervical cancer screening among older women will depend on the participation rate  
109 and, in particular, the ability to reach long-term unscreened women, as these women have a pronounced  
110 risk of cancer<sup>6,26</sup>. Currently, participation in routine screening decreases with increasing age leaving a  
111 relatively high proportion of older women under-screened<sup>10</sup>. A potential solution to this challenge could be  
112 to offer older women a self-sampling kit for HPV testing (self-sampling). Self-sampling is an accurate and

1  
2  
3  
4 113 well-accepted screening method, proven superior to physician-based screening in reaching long-term  
5  
6 114 unscreened women <sup>27 28</sup>. Yet, it remains unknown whether an older screening population will benefit from a  
7  
8  
9 115 self-sampling offer.  
10

## 11 116 **OBJECTIVES**

12  
13  
14 117 This study will evaluate if expanding the upper screening age to include women aged 65-69-year and  
15  
16 118 inviting them to choose between general practitioner (GP)-based screening or self-sampling results in  
17  
18 119 increased detection of cervical intraepithelial neoplasia grade 2 or worse (CIN2+) compared to existing  
19  
20 120 practice where women in this age group of are not invited to routine screening . Furthermore, it will be  
21  
22  
23 121 assessed whether self-sampling is better than GP-based screening in reaching long-term unscreened  
24  
25 122 women.  
26

## 27 123 **HYPOTHESES**

28  
29  
30 124  
31  
32 125 We hypothesize that expanding the upper screening age will result in increased detection of CIN2+ cases  
33  
34 126 and, long-term, potentially reduce the cervical cancer incidence compared to women not invited to  
35  
36  
37 127 screening. Finally, we hypothesize that self-sampling will be superior to GP-based screening in reaching  
38  
39 128 long-term unscreened women.  
40

41 129

42  
43  
44 130  
45  
46  
47  
48  
49  
50  
51  
52  
53  
54  
55  
56  
57  
58  
59  
60

1  
2  
3  
4  
5  
6  
7  
8  
9  
10  
11  
12  
13  
14  
15  
16  
17  
18  
19  
20  
21  
22  
23  
24  
25  
26  
27  
28  
29  
30  
31  
32  
33  
34  
35  
36  
37  
38  
39  
40  
41  
42  
43  
44  
45  
46  
47  
48  
49  
50  
51  
52  
53  
54  
55  
56  
57  
58  
59  
60

## METHODS AND ANALYSIS

### Setting

Organized cervical cancer screening was introduced in parts of Denmark in the 1960s and became nationwide in the late 1990s<sup>29 30</sup>. Screening in Denmark is currently organized by the five regions (North, Central, South, Zealand, and Capital) following national guidelines<sup>30 31</sup>. Cervical cancer screening is centralized to one or a few pathology departments in each region<sup>30</sup>. Danish women are invited to schedule an appointment with their GP for liquid-based cytology screening every third year when aged 23 to 49 years and every fifth year when aged 50 to 64 years<sup>30</sup>. Since 2012, women aged 60-64 years have been screened with an HPV DNA-check-out test, after which HPV negative women can exit the program without consideration of their previous screening history<sup>31</sup>. Outside the organized program, women can have a cervical cytology sample taken by a GP or a gynecologist opportunistically or due to clinical symptoms at any time. In Denmark, cervical cancer screening, including clinical follow-up and treatment, is free of charge<sup>30</sup>.

The intervention in this study will be run by the Department of Public Health Programmes, Randers Regional Hospital in the Central Denmark Region (CDR). The CDR is the second largest region in Denmark covering approximately one-fourth of the Danish population (1.2 million inhabitants)<sup>21</sup>. In the CDR, the Department of Public Health Programmes oversees sending screening invitations, reminders, and test results, while the Department of Pathology, Randers Regional Hospital handles and analyses all cervical cytology samples.

1  
2  
3  
4  
5  
6  
7  
8  
9  
10  
11  
12  
13  
14  
15  
16  
17  
18  
19  
20  
21  
22  
23  
24  
25  
26  
27  
28  
29  
30  
31  
32  
33  
34  
35  
36  
37  
38  
39  
40  
41  
42  
43  
44  
45  
46  
47  
48  
49  
50  
51  
52  
53  
54  
55  
56  
57  
58  
59  
60

## 152 **The call-recall invitation system**

153 The Danish screening program is based on an integrated call-recall system using data from the invitation  
154 module in the nationwide Danish Pathology Databank (DPDB)<sup>30 32 33</sup>. The Conseillers en Gestion et  
155 Informatique (CGI) Institute operates the call-recall system and it is designed so that each region only  
156 invites women residing in their catchment area. The call-recall system invites women for screening after  
157 the age-specific interval has passed since their latest invitation or cervical cytology sample (whichever came  
158 last). Samples obtained opportunistically, symptomatically or as part of surveillance are also recorded in the  
159 DPDB and postpone the next invitation. The system also keeps track of women who are ineligible for  
160 screening because they have actively opted out of the program or have had a hysterectomy. The latter  
161 registration is rather incomplete and varies between the regions. In detail, the invitation module links  
162 cervical cytology data (Systematized Nomenclature of Medicine, SNOMED codes: T8X3\* and T8X210) from  
163 the DPDB's main pathology module with information about residency and vital status from the Danish Civil  
164 Registration System<sup>34 35</sup>. Linkage is performed using the unique Civil Personal Registration number (CPR),  
165 which is assigned to every Danish citizen upon birth and to residents upon immigration<sup>35</sup>. The CPR number  
166 is used by all citizens for any contact to the Danish health care system.

## 167 **Design and eligibility criteria**

168 This study is a nationwide prospective population-based non-randomized intervention study (i.e. a quasi-  
169 experimental design)<sup>36</sup>. Women will consecutively be deemed eligible if they meet the following criteria at  
170 the time of inclusion: aged 65 to 69 years; resident in Denmark for the past 5 years; no record of a cervical  
171 cytology sample or invitation in the past 5 years; not registered in the invitation module as having actively  
172 opted out of the screening program or having a record of total hysterectomy or cervical amputation in the  
173 Danish National Patient Register<sup>37</sup>. Eligible women residing in the CDR will be allocated to the intervention  
174 group, while women residing in the other four Danish regions will be allocated to the reference group  
175 (Figure 1). In the intervention group, the invitation module will be set-up to identify women fitting the

1  
2  
3  
4 176 inclusion criteria, and simultaneously a comparable list of eligible women in the reference group will be  
5  
6 177 compiled by CGI at the Department of Public Health Programmes' request. Inclusion started in April 2019  
7  
8  
9 178 and eligible women will be identified with six months intervals until the desired number of women have  
10  
11 179 been included. The follow-up period for the included women will start on the date of the invitation and end  
12  
13 180 at time of death, emigration, cervical amputation, total hysterectomy, or end of study. Women that move  
14  
15 181 between the intervention region and reference regions in the follow-up period will subsequently be  
16  
17  
18 182 excluded from the analysis.

### 21 183 **Intervention group**

22  
23 184 Women living in the CDR and therefore eligible for the intervention group will be invited to HPV-based  
24  
25 185 cervical cancer screening by either scheduling an appointment for having a cervical cytology sample  
26  
27  
28 186 collected at their GP or collecting a cervico-vaginal sample themselves in their own home using a self-  
29  
30 187 sampling kit. Women will receive an invitation and an information sheet by digital mail, while those  
31  
32 188 exempted from digital mail as per routine will receive the information by postal mail <sup>38</sup>. The invitation  
33  
34 189 explains how to request the self-sampling kit and states that once the woman attends screening it will  
35  
36  
37 190 implicitly represent her consent to store her sample for future quality improvement of the screening  
38  
39 191 program. A phone number for calling the study investigator to decline this option will be available. Test  
40  
41 192 results, including follow-up recommendations, will be sent to the women by digital or postal mail and the  
42  
43 193 woman's GP will receive an electronic copy of the test result. Around 98% of all residents in Denmark are  
44  
45  
46 194 listed with a GP <sup>39</sup>. As per routine, non-participants will receive up to two reminders at 3 and 6 months post  
47  
48 195 invitation <sup>30</sup>. All information will be in Danish.

### 50 196 **The self-sampling kit**

51  
52 197 The self-sampling kit can be requested by phone or through a study webpage. After receiving the orders in  
53  
54  
55 198 the department, the kit will be mailed to the women within four business days. The kit includes the dry  
56  
57 199 Evalyn<sup>®</sup> brush self-sampling device (Rovers Medical Devices B.V, Oss, Netherlands) <sup>40</sup>, written and picture-  
58  
59  
60

1  
2  
3  
4  
5  
6  
7  
8  
9  
10  
11  
12  
13  
14  
15  
16  
17  
18  
19  
20  
21  
22  
23  
24  
25  
26  
27  
28  
29  
30  
31  
32  
33  
34  
35  
36  
37  
38  
39  
40  
41  
42  
43  
44  
45  
46  
47  
48  
49  
50  
51  
52  
53  
54  
55  
56  
57  
58  
59  
60

200 based user instructions on how to collect and mail the self-sample, and a pre-stamped return envelope  
201 addressed to the Department of Pathology, Randers Regional Hospital <sup>41</sup>. The acceptability of both the self-  
202 sampling device and user instructions has been carefully evaluated in previous studies, although among  
203 younger women (30-59 years) <sup>42 43</sup>.

### 204 **Processing and analysis of samples**

205 In the intervention group, all samples will be prepared, processed and analyzed at the Department of  
206 Pathology, Randers Regional Hospital according to the routine laboratory protocols. All HPV testing will be  
207 performed using the clinically validated and Federal Drug Agency (FDA)-approved Cobas<sup>®</sup> 4800 DNA test  
208 (Roche Diagnostics, Switzerland) <sup>44</sup>, as this is the routine test platform used in the CDR. The test is an  
209 automated real-time PCR-based test designed to detect high-risk HPV types: 16,18,31,33,35,39,45,51,52,  
210 56,58,59,66 and 68 <sup>44 45</sup> and is validated for use on SurePath collected samples <sup>46</sup>. Results will be reported as  
211 1) HPV negative, 2) HPV positive (HPV16, HPV18 and/ or other HPV types) or 3) invalid <sup>41</sup>. All samples with  
212 an invalid test result will be re-tested, and the second result will be considered definitive. The Cobas test  
213 measures beta-globin as an internal control for sample cellularity, valid sample extraction, and  
214 amplification <sup>45</sup>.

215 As per routine, cervical cytology samples taken by the GPs will be collected using a cervical brush and rinsed  
216 in 10 mL SurePath medium (BD Diagnostics, Burlington, NC) and mailed to the Department of Pathology,  
217 Randers Regional Hospital for processing and HPV testing. For HPV positive women, reflex cytology testing  
218 will be performed on the residual cellular Surepath material. Cytology will be interpreted by  
219 cytotechnologists using computer-assisted microscopy and categorized per the Bethesda 2014 grading  
220 system as normal; inadequate; Atypical Squamous Cells of Undetermined Significance (ASC-US); Low-grade  
221 Squamous Intraepithelial Lesion (LSIL); Atypical Squamous Cells cannot exclude HSIL (ASC-H). High-grade  
222 Squamous Intraepithelial Lesion (HSIL); Squamous Cell Carcinoma (SCC); Atypical Glandular Cells (AGC),  
223 Adenocarcinoma In Situ (AIS); Adenocarcinoma (ACC), and malignant tumor cells. At the laboratory, the

1  
2  
3  
4 224 Evalyn brush device will be rinsed into 10 mL SurePath medium (BD Diagnostics, Burlington, NC) and  
5  
6 225 processed as previously described <sup>42</sup>.  
7  
8  
9 226 From the cervical cytology samples and self-samples, 2 mL of the SurePath medium will be placed in test  
10  
11 227 tubes for HPV testing. The residual eluate material from these samples will be stored at -80°C for future  
12  
13 228 extended genotyping and DNA methylation analysis. As part of the study, and only in the intervention  
14  
15 229 group, p16/Ki67 cytology dual staining (CINtec<sup>®</sup> PLUS cytology kit, Roche Diagnostics, Switzerland) will be  
16  
17 230 performed consecutively on the residual SurePath cell-pellet obtained from women with an HPV positive  
18  
19  
20 231 cervical cytology sample and sufficient material for cytology testing. The dual staining result will not affect  
21  
22 232 the clinical management of the woman. Except for the dual staining result, all test results will routinely be  
23  
24 233 registered in the DPDB <sup>33</sup>.  
25

## 26 234 **Clinical management**

27  
28  
29 235 Figures 2 and 3 show the recommended, and therefore, expected clinical management for women in the  
30  
31 236 intervention group, but management may deviate depending on the clinical presentation of the individual  
32  
33 237 woman. The recommendations are in accordance with the routine screening guidelines for 60-64-year-old  
34  
35 238 women and the new guidelines for clinical management of older women with dysplasia and HPV <sup>31 47</sup>.  
36  
37  
38 239 Women who are positive for HPV16 or 18 AND other types will be managed similar to HPV16/18 positive  
39  
40 240 women.  
41  
42 241 For women attending GP-based screening, those who tested HPV negative will have no further follow-up  
43  
44 242 (Figure 2). Women tested positive for HPV 16/18 will be referred directly to colposcopy (regardless of the  
45  
46 243 cytology result). Women tested HPV positive for other types than HPV16/18 with ASC-US or more severe  
47  
48 244 cytological abnormalities will be referred to colposcopy, while women with HPV types other than HPV16/18  
49  
50 245 and normal cytology will undergo repeated co-testing (HPV and cytology) after 12 months and will be  
51  
52 246 referred for colposcopy if either test result is positive.  
53

54  
55  
56 247 Figure 3 presents the follow-up recommendations for women attending self-sampling. Women who tested  
57  
58 248 HPV negative in their self-sample will have no further follow-up. Women with an HPV positive self-sample  
59  
60

1  
2  
3  
4  
5  
6  
7  
8  
9  
10  
11  
12  
13  
14  
15  
16  
17  
18  
19  
20  
21  
22  
23  
24  
25  
26  
27  
28  
29  
30  
31  
32  
33  
34  
35  
36  
37  
38  
39  
40  
41  
42  
43  
44  
45  
46  
47  
48  
49  
50  
51  
52  
53  
54  
55  
56  
57  
58  
59  
60

(any genotype) will be advised to have a cervical cytology triage sample taken by their GP within 30 days to evaluate the need for referral to colposcopy. This triage sample will be co-tested with HPV and cytology. Women tested HPV negative with normal cytology will have no further follow-up, while those with ASC-US/LSIL cytology will undergo a repeat co-test (HPV and cytology) after 12 months and will be referred for colposcopy if either test result is positive. Those with ASC-H or more severe abnormalities will be referred for colposcopy. Women with an HPV positive triage cytology sample will follow the same recommendation as described for the GP-based screening (Figure 2).

For women referred for colposcopy, cervical punch biopsies will be taken from suspicious areas, supplemented with random biopsies according to Danish guidelines<sup>48</sup>. Some women may also undergo a diagnostic conization as part of a clinical "See and Treat" study<sup>49</sup>. Histological examination of the cervical biopsies will be carried out at different local Pathology Departments and graded using the Cervical Intraepithelial Neoplasia (CIN) classification as normal (including inflammation and non-specific reactive features), CIN (not specified), CIN grade 1, 2 or 3/AIS, or invasive cancer.

### Reference group

Women in the reference group will receive usual care which, for 65-69-year-old women, is the opportunity to have a cervical cytology sample obtained at their GP or by a gynecologist for whatever reason. The women will not receive a screening invitation, but will be assigned individual pseudo screening invitation dates allowing comparison between the groups in our statistical analysis. In the following, the term "invitation date" will be used for both for the "true invitation dates" in the intervention group and "pseudo invitation dates" in the reference group. In all reference regions, samples from this age group are expected to be tested for HPV. Differences across the four regions are found in the HPV assay<sup>18</sup> and there may be minor differences in the triage-strategies, which may result in differences in indication for colposcopy referral. However, clinical management of women referred for colposcopy is expected to follow national guidelines as described above<sup>47 48</sup>.



1  
2  
3  
4  
5  
6  
7  
8  
9  
10  
11  
12  
13  
14  
15  
16  
17  
18  
19  
20  
21  
22  
23  
24  
25  
26  
27  
28  
29  
30  
31  
32  
33  
34  
35  
36  
37  
38  
39  
40  
41  
42  
43  
44  
45  
46  
47  
48  
49  
50  
51  
52  
53  
54  
55  
56  
57  
58  
59  
60

## 274 **Outcomes**

275 Overview of outcomes and planned comparisons is seen in Table 1.

276 In both groups, the primary outcome will be the proportion of CIN2+ (CIN2, CIN3/AIS, and cancer) detected  
277 within 18 months following registration of a cervical cytology sample or self-sample. The proportion of  
278 CIN3+ (CIN3/AIS, and cancer) will be a secondary outcome. The most severe histological test result will be  
279 used if more than one result is available in the follow-up period. Other outcomes in the intervention group  
280 will be screening participation measured 12 months after the invitation date, defined by returning a self-  
281 sample or having a cervical cytology taken; screening history of participants, stratified by sampling  
282 procedure; HPV positivity rate and HPV type distribution in self-samples versus GP-collected cervical  
283 cytology samples; cytology results, and the percentage of HPV positive self-samplers undergoing  
284 appropriate follow-up. Compliance to follow-up after self-sampling will be defined as attending a GP for a  
285 cervical cytology-triage sample within 30, 60, 90 or 180 days after mailing of the test results. The  
286 proportion and results of cervical cytology samples obtained among women not invited for screening will  
287 be identified in the reference group and measured 12 months post invitation date. As in another study<sup>2</sup>,  
288 the primary measure of harms will in both groups be the number of colposcopies/conizations performed,  
289 both overall and relatively to  $\leq$ CIN1, CIN2, CIN3/AIS, and cancers detected within a follow-up period of 18  
290 months after registration of a cervical cytology sample or self-sample. Long-term outcomes will be cervical  
291 cancer incidence rates reported by groups at 5- and 10-years post invitation dates. A description of  
292 histological type and FIGO stage of the detected cervical cancers will be provided.

## 293 **Data sources and statistical analysis**

294 An overview of data sources and information is seen in Table 2.

295 Baseline characteristics in both groups will be presented using descriptive statistics (numbers and  
296 proportions) on screening history, comorbidities, sociodemographic factors (e.g. age, marital status, and  
297 education level). Screening history will be categorized based on the woman's screening history in a 15-year  
298 period before screening exit (i.e. age 50-64) according to the results of the cytology screening at age 50-59

1  
2  
3  
4  
5  
6  
7  
8  
9  
10  
11  
12  
13  
14  
15  
16  
17  
18  
19  
20  
21  
22  
23  
24  
25  
26  
27  
28  
29  
30  
31  
32  
33  
34  
35  
36  
37  
38  
39  
40  
41  
42  
43  
44  
45  
46  
47  
48  
49  
50  
51  
52  
53  
54  
55  
56  
57  
58  
59  
60

299 and the HPV-exit test at age 60-64. The categorization of screening history is expected to be as follows <sup>6</sup>:

300 1) "Sufficiently screened with normal results" if women had a) at least one normal cytology at age 50-54

301 and b) at least one normal cytology at age 55-59, and c) no abnormal cytology (ASC-US or worse) at age 50-

302 59, and d) HPV negative at age 60-64; 2) "Insufficiently screened with normal results" if women had one or

303 more cytology samples with only normal results, but only in one or two age categories (50-54, 55-59 or 60-

304 64); 3) "Long-term unscreened" if no cervical cytology sample at age 50-64; and 4) "Abnormal screening" if

305 women a) had ASC-US or worse at least once at age 50-59 or b) HPV positive at age 60-64.

306 Screening participation, cervical cytology samples, numbers of colposcopies/conizations performed,

307 compliance to follow-up among positive self-samplers, and disease outcomes (HPV positivity rate and

308 histological outcomes) will be estimated as proportions. Participation in the intervention group will be

309 reported by age groups, screening history, and sampling method (GP versus self-sampling). Regression

310 analyses will be used to estimate the association between CIN2+ detection in women offered cervical

311 cancer screening compared to those not offered screening. Both crude and adjusted estimates will be

312 presented with 95% confidence intervals (CIs).The cumulative incidence rates of cervical cancer among

313 women in the intervention and reference groups will be reported, including the distribution of the

314 histological types and FIGO stage of the detected cancers. All statistical analyses will be performed using

315 STATA version 16 (College Station, TX: StataCorp LP).

### 316 **Sample size**

317 The sample size was determined by the primary outcome (CIN2+). In Denmark, approximately 167,000

318 Danish women are currently aged 65-69 years, 37,000 of whom (22,2%) reside in the CDR (intervention

319 group) <sup>21</sup>. We anticipate that an estimated 55% of these will not have a record of a cervical cytology sample

320 in the DPDB within the past five years. As follows, the study cohort will consist of a total of 91,850 women,

321 including approximately 20,000 women in the intervention group. We assume that 50% of the eligible

322 women in the intervention group will accept the screening offer and that the proportion of CIN2+ is 0.3%

323 among participants. Thus, by including 10,000 women in the intervention group, the study will have a

1  
2  
3  
4 324 power of 80% to detect a difference in the CIN2+ proportion of 0.1 percentage points between the  
5  
6 325 intervention and reference group. The proportion of CIN2+ that was chosen (0.3%) is a conservative  
7  
8  
9 326 estimate inspired by Swedish data reporting a CIN2+ proportion of 0.38% among 56-60-year-old women  
10  
11 327 attending HPV-based screening using the Cobas 4800 test <sup>50</sup>.

12  
13  
14 328 **Timeline**

15  
16 329 The study enrollment is expected to continue until 10,000 participants have been included in the  
17  
18  
19 330 intervention group. Invitations will be sent out prospectively over an expected 4.5 year-period starting  
20  
21 331 April 2019.

22  
23  
24 332 **PATIENT AND PUBLIC INVOLVEMENT**

25  
26  
27 333 The research questions were developed in response to the on-going public and scientific discussion in  
28  
29 334 Denmark regarding expanding the upper screening age in the organized cervical cancer screening program.  
30  
31 335 No patients or patient organizations were involved in the development, design, or implementation of this  
32  
33  
34 336 study.

35  
36  
37 337

38  
39  
40  
41  
42  
43  
44  
45  
46  
47  
48  
49  
50  
51  
52  
53  
54  
55  
56  
57  
58  
59  
60

## ETHICS AND DISSEMINATION

### Ethics

According to the EU's General Data Protection Regulation, the project was listed at the record of processing activities for research projects in the CDR (j. no: 1-16-02-158-18). The study was approved by the Danish Patient Safety Authority (j.no: 3-3013-2634/1). The study protocol has been submitted to the Ethical Committee in the CDR. The Committee decided that according to the Consolidation Act on Research Ethics Review of Health Research Projects, Consolidation Act number 1083 of 15 September 2017 section 2 (1), this study is not notifiable to the Committee (j.no.: 73/2018) and informed consent is therefore not required.

### Dissemination

The study protocol is registered at ClinicalTrials.gov (NCT04114968) and is made public in this protocol article. The results will be reported through publication of peer-reviewed articles in international scientific journals and presented at national and international scientific meetings. Moreover, the study results will be disseminated to healthcare stakeholders, and patient organizations at scientific meetings, and to the general public through press releases.

1  
2  
3  
4  
5  
6  
7  
8  
9  
10  
11  
12  
13  
14  
15  
16  
17  
18  
19  
20  
21  
22  
23  
24  
25  
26  
27  
28  
29  
30  
31  
32  
33  
34  
35  
36  
37  
38  
39  
40  
41  
42  
43  
44  
45  
46  
47  
48  
49  
50  
51  
52  
53  
54  
55  
56  
57  
58  
59  
60

## STRENGTHS AND LIMITATIONS OF THIS STUDY

To our knowledge, this prospective population-based intervention study will be the first to evaluate if HPV-based cervical cancer screening among older women aged 65-69 years results in an increased detection of CIN2+ cases as compared to women not invited to screening. Importantly, this study will evaluate whether the potential harms of screening in older women are outweighed by the potential benefits of decreasing the incidence of cervical (pre)-cancer<sup>2,51</sup>. Overall, this knowledge will address important research gaps and may help guide future screening recommendations. Compared with previous studies which report, by necessity, only the effect of cytology screening at older ages<sup>7,22-25</sup> it is of great value for future decision making that this study will be able to determine the effect of screening at older ages in women who have had an exit HPV-test<sup>51</sup>. A key strength is that the effect of the screening intervention will be measured prospectively within an organized program. From an implementation point of view, this will provide reliable estimates of the expected participation rates if extending the upper screening age together with the possibility of self-sampling would become routine. We will identify outcomes from the nationwide DPDB which has highly valid records on all pathology specimens in Denmark<sup>33</sup>, and the selection of study participants is population-based and determined by data from the invitation module; thus eliminating both information bias and selection problems. Important limitations should be mentioned. The lack of randomization gives rise to confounding of both known and unknown risk factors. Age<sup>6</sup>, screening history<sup>6</sup>, comorbidities<sup>52</sup>, education level<sup>6</sup>, marital status<sup>6</sup>, smoking status<sup>7</sup>, and sexual behavior<sup>6</sup> may be potential confounding factors for the association between screening status and cervical (pre)-cancer development. Except for smoking status and sexual behavior, we will be able to assess whether the distribution of the remaining factors is well-balanced between the groups by using individual-level registry data<sup>37,33,53</sup>. Ideally, eligible women in all Danish regions should have been individually randomized to the intervention and reference group instead of being allocated to the groups based on their geographical location. Unfortunately, this was not feasible from an organizational point of view. Potentially, there may have been regional differences in the proportion of CIN2+ cases detected prior to the start of our study. If that is the

1  
2  
3  
4  
5  
6  
7  
8  
9  
10  
11  
12  
13  
14  
15  
16  
17  
18  
19  
20  
21  
22  
23  
24  
25  
26  
27  
28  
29  
30  
31  
32  
33  
34  
35  
36  
37  
38  
39  
40  
41  
42  
43  
44  
45  
46  
47  
48  
49  
50  
51  
52  
53  
54  
55  
56  
57  
58  
59  
60

380 case, it may affect the impact of the intervention on CIN2+ detection rates. Fortunately, we will be able to  
381 take into account these potential regional differences by using data from the nationwide DPDB.  
382 Detection of invasive and advanced cervical cancer is the optimal outcome measure to evaluate the effect  
383 of screening at older ages <sup>51</sup>, but given the relative rarity of cervical cancer in older women, the length of  
384 follow-up needed and the large sample size required, we chose CIN2+ and CIN3+ as the primary and  
385 secondary outcome, respectively. Yet, it should be noted that the majority of CIN2 and CIN3 lesions  
386 detected after age 65 might not have sufficient time to progress to invasive cancer in the remaining  
387 lifespan <sup>2</sup>. For screening purposes, including CIN2+ and CIN3 cases as the primary and secondary outcomes,  
388 respectively, may be justified by them being treatable endpoints (conization) in older non-reproductive  
389 women according to Danish guidelines <sup>47</sup>, while still recognizing that the detection and treatment of CIN3,  
390 especially CIN2, may be considered as overtreatment.

391

1  
2  
3  
4  
5  
6  
7  
8  
9  
10  
11  
12  
13  
14  
15  
16  
17  
18  
19  
20  
21  
22  
23  
24  
25  
26  
27  
28  
29  
30  
31  
32  
33  
34  
35  
36  
37  
38  
39  
40  
41  
42  
43  
44  
45  
46  
47  
48  
49  
50  
51  
52  
53  
54  
55  
56  
57  
58  
59  
60

392 **Trial status**

393 Ongoing.

394 **Acknowledgements:**

395 Not applicable.

396 **Contributors:**

397 MT is the principal investigator of the study and is responsible for conducting the study overall. BA and MT  
398 conceived the original idea. Subsequently, LKP, ME, AH, MBH and JB also contributed to the design of the  
399 study. JSJ especially contributed with comments on the laboratory part of the protocol, while LKP, JB, and  
400 AH have provided clinical advice on follow-up of women with abnormal results. MT is the first author and  
401 drafted the first version of this protocol article, which was subsequently further developed by all authors,  
402 who also reviewed and approved the final version.

403 **Funding:**

404 The initiative and the study was partly funded by the Department of Public Health Programmes, Randers  
405 Regional Hospital, which is located in the Central Denmark Region. Some public funding had been provided  
406 by the Health Foundation (grant no.:18-B-0125) and other fundraising is on-going. The Health foundation  
407 had no role in the design of the study and collection, analysis, and interpretation of the data, and in writing  
408 the manuscript.

410 **Competing interests:**

411 Roche sponsors the Cobas HPV-DNA test kits and CINTec Plus test kits for the study. According to the  
412 contract between Roche and the Department of Public Health Programmes, Randers Regional Hospital,  
413 Roche has commented on the protocol article, but had no influence on the scientific process and no  
414 editorial rights pertaining to this manuscript. The authors retained the right to submit the manuscript. MT,

1  
2  
3  
4  
5  
6  
7  
8  
9  
10  
11  
12  
13  
14  
15  
16  
17  
18  
19  
20  
21  
22  
23  
24  
25  
26  
27  
28  
29  
30  
31  
32  
33  
34  
35  
36  
37  
38  
39  
40  
41  
42  
43  
44  
45  
46  
47  
48  
49  
50  
51  
52  
53  
54  
55  
56  
57  
58  
59  
60

415 JB, JSJ and BA have participated in other studies with HPV test kits sponsored by Roche and self-sampling  
416 devices sponsored by Axlab. MT has received honoraria from Roche Diagnostics and AstraZeneca for  
417 lectures on HPV self-sampling and HPV triage-methods, respectively. AH has received lecture fees from  
418 AstraZeneca. All authors declare no conflicts of interest.

**Patient consent:**

420 Not required

**Ethics approval:**

422 The study protocol has been submitted to the Ethical Committee in the CDR which deemed that the study  
423 was not notifiable to the Committee and informed consent is therefore not required.

**Provenance and peer review:**

425 Not commissioned; externally peer-reviewed.

For peer review only



1  
2  
3  
4  
5  
6  
7  
8  
9  
10  
11  
12  
13  
14  
15  
16  
17  
18  
19  
20  
21  
22  
23  
24  
25  
26  
27  
28  
29  
30  
31  
32  
33  
34  
35  
36  
37  
38  
39  
40  
41  
42  
43  
44  
45  
46  
47  
48  
49  
50  
51  
52  
53  
54  
55  
56  
57  
58  
59  
60**REFERENCES**

1. Arbyn M, Anttila A, Jordan J, et al. European Guidelines for Quality Assurance in Cervical Cancer Screening. Second edition--summary document. *Ann Oncol* 2010;21(3):448-58. doi: 10.1093/annonc/mdp471 [published Online First: 2010/02/24]
2. Saslow D, Solomon D, Lawson HW, et al. American Cancer Society, American Society for Colposcopy and Cervical Pathology, and American Society for Clinical Pathology screening guidelines for the prevention and early detection of cervical cancer. *Am J Clin Pathol* 2012;137(4):516-42. doi: 10.1309/ajcptgd94evrsjcg [published Online First: 2012/03/21]
3. Anttila A, von Karsa L, Aasmaa A, et al. Cervical cancer screening policies and coverage in Europe. *European journal of cancer* 2009;45(15):2649-58.
4. Rustagi AS, Kaminen A, Weiss NS. Point: cervical cancer screening guidelines should consider observational data on screening efficacy in older women. *Am J Epidemiol* 2013;178(7):1020-2. doi: 10.1093/aje/kwt167 [published Online First: 2013/08/24]
5. Isidean SD, Franco EL. Counterpoint: cervical cancer screening guidelines--approaching the golden age. *Am J Epidemiol* 2013;178(7):1023-6; discussion 27. doi: 10.1093/aje/kwt171 [published Online First: 2013/08/24]
6. Wang J, Andrae B, Sundstrom K, et al. Effectiveness of cervical screening after age 60 years according to screening history: Nationwide cohort study in Sweden. *PLoS Med* 2017;14(10):e1002414. doi: 10.1371/journal.pmed.1002414 [published Online First: 2017/10/25]
7. Castanon A, Landy R, Cuzick J, et al. Cervical screening at age 50-64 years and the risk of cervical cancer at age 65 years and older: population-based case control study. *PLoS Med* 2014;11(1):e1001585. doi: 10.1371/journal.pmed.1001585 [published Online First: 2014/01/24]
8. Gyllensten U, Gustavsson I, Lindell M, et al. Primary high-risk HPV screening for cervical cancer in post-menopausal women. *Gynecol Oncol* 2012;125(2):343-5. doi: 10.1016/j.ygyno.2012.01.036 [published Online First: 2012/02/02]
9. Engholm G, Ferlay J, Christensen N, et al. NORDCAN—a Nordic tool for cancer information, planning, quality control and research. *Acta Oncologica* 2010;49(5):725-36.
10. Sherman SM, Castanon A, Moss E, et al. Cervical cancer is not just a young woman's disease. *BMJ* 2015;350:h2729. doi: 10.1136/bmj.h2729 [published Online First: 2015/06/17]
11. Hammer A, Kahlert J, Rositch A, et al. The temporal and age-dependent patterns of hysterectomy-corrected cervical cancer incidence rates in Denmark: a population-based cohort study. *Acta Obstet Gynecol Scand* 2017;96(2):150-57. doi: 10.1111/aogs.13057 [published Online First: 2016/11/20]
12. Darlin L, Borgfeldt C, Widen E, et al. Elderly women above screening age diagnosed with cervical cancer have a worse prognosis. *Anticancer Res* 2014;34(9):5147-51. [published Online First: 2014/09/10]
13. Hammer A, Kahlert J, Gravitt PE, et al. Hysterectomy-corrected cervical cancer mortality rates in Denmark during 2002-2015: A registry-based cohort study. *Acta Obstet Gynecol Scand* 2019;98(8):1063-69. doi: 10.1111/aogs.13608 [published Online First: 2019/03/15]
14. Gravitt PE. Evidence and impact of human papillomavirus latency. *Open Virol J* 2012;6:198-203. doi: 10.2174/1874357901206010198 [published Online First: 2013/01/24]
15. Maglennon GA, Doorbar J. The biology of papillomavirus latency. *Open Virol J* 2012;6:190-7. doi: 10.2174/1874357901206010190 [published Online First: 2013/01/24]
16. Maglennon GA, McIntosh PB, Doorbar J. Immunosuppression facilitates the reactivation of latent papillomavirus infections. *J Virol* 2014;88(1):710-6. doi: 10.1128/jvi.02589-13 [published Online First: 2013/11/01]
17. Hammer A, de Koning MN, Blaakaer J, et al. Whole tissue cervical mapping of HPV infection: Molecular evidence for focal latent HPV infection in humans. *Papillomavirus Res* 2019;7:82-87. doi: 10.1016/j.pvr.2019.02.004 [published Online First: 2019/02/18]

- 1  
2  
3  
4 474 18. Andersen B, Christensen BS, Christensen J, et al. HPV-prevalence in elderly women in Denmark. *Gynecol*  
5 475 *Oncol* 2019;154(1):118-23. doi: 10.1016/j.ygyno.2019.04.680 [published Online First: 2019/05/16]  
6 476 19. Lynge E, Lönnberg S, Törnberg S. Cervical cancer incidence in elderly women-biology or screening  
7 477 history? *European journal of cancer* 2017;74:82-88.  
8 478 20. Elit L. Role of cervical screening in older women. *Maturitas* 2014;79(4):413-20. doi:  
9 479 10.1016/j.maturitas.2014.09.012 [published Online First: 2014/12/03]  
10 480 21. Statistics Denmark. Statistik databanken 2020 [cited 2020 15 January]. Available from:  
11 481 www.statistikbanken.dk accessed Web Page 2020.  
12 482 22. Andrae B, Kemetli L, Sparen P, et al. Screening-preventable cervical cancer risks: evidence from a  
13 483 nationwide audit in Sweden. *Journal of the National Cancer Institute* 2008;100(9):622-29. doi:  
14 484 10.1093/jnci/djn099 [doi]  
15 485 23. Rosenblatt KA, Osterbur EF, Douglas JA. Case-control study of cervical cancer and gynecologic  
16 486 screening: A SEER-Medicare analysis. *Gynecol Oncol* 2016;142(3):395-400. doi:  
17 487 10.1016/j.ygyno.2016.06.016 [published Online First: 2016/07/09]  
18 488 24. Kamineneni A, Weinmann S, Shy KK, et al. Efficacy of screening in preventing cervical cancer among older  
19 489 women. *Cancer Causes Control* 2013;24(9):1653-60. doi: 10.1007/s10552-013-0239-4 [published  
20 490 Online First: 2013/06/08]  
21 491 25. Rustagi AS, Kamineneni A, Weinmann S, et al. Cervical screening and cervical cancer death among older  
22 492 women: a population-based, case-control study. *Am J Epidemiol* 2014;179(9):1107-14. doi:  
23 493 10.1093/aje/kwu035 [published Online First: 2014/04/02]  
24 494 26. Hammer A, Soegaard V, Maimburg RD, et al. Cervical cancer screening history prior to a diagnosis of  
25 495 cervical cancer in Danish women aged 60 years and older-A national cohort study. *Cancer Med*  
26 496 2019;8(1):418-27. doi: 10.1002/cam4.1926 [published Online First: 2019/01/03]  
27 497 27. Nelson EJ, Maynard BR, Loux T, et al. The acceptability of self-sampled screening for HPV DNA: a  
28 498 systematic review and meta-analysis. *Sexually transmitted infections* 2017;93(1):56-61. doi:  
29 499 10.1136/sextrans-2016-052609 [doi]  
30 500 28. Arbyn M, Smith SB, Temin S, et al. Detecting cervical precancer and reaching underscreened women by  
31 501 using HPV testing on self samples: updated meta-analyses. *Bmj* 2018;363:k4823. doi:  
32 502 10.1136/bmj.k4823 [published Online First: 2018/12/07]  
33 503 29. Lynge E, Clausen LB, Guignard R, et al. What happens when organization of cervical cancer screening is  
34 504 delayed or stopped? *Journal of medical screening* 2006;13(1):41-46. doi:  
35 505 10.1258/096914106776179773 [doi]  
36 506 30. Lynge E, Rygaard C, Baillet MVP, et al. Cervical cancer screening at crossroads. *Apmis* 2014;122(8):667-  
37 507 73.  
38 508 31. Danish Health Authority. Screening for livmoderhalskræft-anbefalinger 2012 [In English: Cervical cancer  
39 509 screening-recommendations 2012]. Copenhagen [in Danish with English summary] 2012 [Available  
40 510 from: <https://www.sst.dk/~media/B1211EAFEDFB47C5822E883205F99B79.ashx> accessed 24  
41 511 March 2020.  
42 512 32. Lynge E, Andersen B, Christensen J, et al. Cervical screening in Denmark—a success followed by  
43 513 stagnation. *Acta Oncologica* 2017:1-8.  
44 514 33. Erichsen R, Lash TL, Hamilton-Dutoit SJ, et al. Existing data sources for clinical epidemiology: the Danish  
45 515 National Pathology Registry and Data Bank. *Clinical epidemiology* 2010;2:51-56.  
46 516 34. Bjerregaard B, Larsen OB. The Danish Pathology Register. *Scandinavian Journal of Public Health*  
47 517 2011;39(7 Suppl):72-74. doi: 10.1177/1403494810393563 [doi]  
48 518 35. Schmidt M, Pedersen L, Sørensen HT. The Danish Civil Registration System as a tool in epidemiology.  
49 519 *European journal of epidemiology* 2014;29(8):541-49.  
50 520 36. Barnighausen T, Tugwell P, Rottingen JA, et al. Quasi-experimental study designs series-paper 4: uses  
51 521 and value. *J Clin Epidemiol* 2017;89:21-29. doi: 10.1016/j.jclinepi.2017.03.012 [published Online  
52 522 First: 2017/04/04]  
53  
54  
55  
56  
57  
58  
59  
60

1  
2  
3  
4  
5  
6  
7  
8  
9  
10  
11  
12  
13  
14  
15  
16  
17  
18  
19  
20  
21  
22  
23  
24  
25  
26  
27  
28  
29  
30  
31  
32  
33  
34  
35  
36  
37  
38  
39  
40  
41  
42  
43  
44  
45  
46  
47  
48  
49  
50  
51  
52  
53  
54  
55  
56  
57  
58  
59  
60

37. Schmidt M, Schmidt SA, Sandegaard JL, et al. The Danish National Patient Registry: a review of content, data quality, and research potential. *Clin Epidemiol* 2015;7:449-90. doi: 10.2147/clep.S91125 [published Online First: 2015/11/26]
38. The Danish Agency for Digitisation. About NemID. 2020 [Available from: [https://www.nemid.nu/dk-en/about\\_nemid/](https://www.nemid.nu/dk-en/about_nemid/) accessed January 2020.
39. Pedersen KM, Andersen JS, Sondergaard J. General practice and primary health care in Denmark. *Journal of the American Board of Family Medicine : JABFM* 2012;25 Suppl 1:S34-8. doi: 10.3122/jabfm.2012.02.110216 [doi]
40. van Baars R, Bosgraaf RP, ter Harmsel BW, et al. Dry storage and transport of a cervicovaginal self-sample by use of the Evalyn Brush, providing reliable human papillomavirus detection combined with comfort for women. *Journal of clinical microbiology* 2012;50(12):3937-43. doi: 10.1128/JCM.01506-12 [doi]
41. Tranberg M, Bech BH, Blaakær J, et al. Study protocol of the CHOICE trial: a three-armed, randomized, controlled trial of home-based HPV self-sampling for non-participants in an organized cervical cancer screening program. *BMC cancer* 2016;16(1):835.
42. Tranberg M, Bech BH, Blaakær J, et al. Preventing cervical cancer using HPV self-sampling: direct mailing of test-kits increases screening participation more than timely opt-in procedures-a randomized controlled trial. *BMC cancer* 2018;18(1):273.
43. Tranberg M, Jensen JS, Bech BH, et al. Good concordance of HPV detection between cervico-vaginal self-samples and general practitioner-collected samples using the Cobas 4800 HPV DNA test. *Bmc Infectious Diseases* 2018;18 doi: ARTN 34810.1186/s12879-018-3254-y
44. Heideman DA, Hesselink AT, Berkhof J, et al. Clinical validation of the cobas 4800 HPV test for cervical screening purposes. *Journal of clinical microbiology* 2011;49(11):3983-85. doi: 10.1128/JCM.05552-11 [doi]
45. Rao A, Young S, Erlich H, et al. Development and characterization of the cobas human papillomavirus test. *Journal of clinical microbiology* 2013;51(5):1478-84. doi: 10.1128/JCM.03386-12; 10.1128/JCM.03386-12
46. Ejegod DM, Hansen M, Christiansen IK, et al. Clinical validation of the Cobas 4800 HPV assay using cervical samples in SurePath medium under the VALGENT4 framework. *J Clin Virol* 2020;128:104336. doi: 10.1016/j.jcv.2020.104336 [published Online First: 2020/05/24]
47. Petersen LK. National Clinical Guideline for Cervical dysplasia. Examination, treatment, and management of women aged 60 and older [Only in Danish]: DSOG; 2019 [Available from: [https://www.sst.dk/-/media/Opgaver/Patientforl%C3%B8b-og-kvalitet/NKR/Puljefinansierede-NKR/pdf-version-af-published\\_guideline\\_2633.ashx?la=da&hash=0809DD9A773B341B3D08AE73C9361E2AB84029E8](https://www.sst.dk/-/media/Opgaver/Patientforl%C3%B8b-og-kvalitet/NKR/Puljefinansierede-NKR/pdf-version-af-published_guideline_2633.ashx?la=da&hash=0809DD9A773B341B3D08AE73C9361E2AB84029E8).
48. Petersen LK. Examination, treatment and control of cervical dysplasia [Only in Danish]: 2013: DSOG; 2013 [Available from: <http://gynobsguideline.dk/hindsgavl/Cervixdysplasi2012.pdf>.
49. Gustafson LW HA, Petersen LK, Andersen B, Bor P. "See and Treat" in an outpatient setting in women above 45 years with cervical dysplasia. For study protocol. See [Clinicaltrials.gov](https://clinicaltrials.gov/ct2/show/study/NCT04298957). NCT:04298957. 2020
50. Sahlgren H, Elfstrom KM, Lamin H, et al. Colposcopic and histopathologic evaluation of women with HPV persistence exiting an organized screening program. *Am J Obstet Gynecol* 2020;222(3):253 e1-53 e8. doi: 10.1016/j.ajog.2019.09.039 [published Online First: 2019/10/05]
51. Gravitt PE, Landy R, Schiffman M. How confident can we be in the current guidelines for exiting cervical screening? *Prev Med* 2018;114:188-92. doi: 10.1016/j.ypmed.2018.07.005 [published Online First: 2018/07/10]
52. Diaz A, Kang J, Moore SP, et al. Association between comorbidity and participation in breast and cervical cancer screening: A systematic review and meta-analysis. *Cancer Epidemiol* 2017;47:7-19. doi: 10.1016/j.canep.2016.12.010 [published Online First: 2017/01/14]

1  
2  
3  
4  
5  
6  
7  
8  
9  
10  
11  
12  
13  
14  
15  
16  
17  
18  
19  
20  
21  
22  
23  
24  
25  
26  
27  
28  
29  
30  
31  
32  
33  
34  
35  
36  
37  
38  
39  
40  
41  
42  
43  
44  
45  
46  
47  
48  
49  
50  
51  
52  
53  
54  
55  
56  
57  
58  
59  
60

- 572 53. Thygesen LC, Daasnes C, Thaulow I, et al. Introduction to Danish (nationwide) registers on health and  
573 social issues: structure, access, legislation, and archiving. *Scand J Public Health* 2011;39(7 Suppl):12-  
574 6. doi: 10.1177/1403494811399956 [published Online First: 2011/09/08]  
575 54. Gjerstorff ML. The Danish Cancer Registry. *Scand J Public Health* 2011;39(7 Suppl):42-5. doi:  
576 10.1177/1403494810393562 [published Online First: 2011/08/04]

For peer review only

1  
2  
3  
4 578 **Table 1: Overview of outcomes and planned comparisons**

| Outcome                                                  | Comparisons                                      |
|----------------------------------------------------------|--------------------------------------------------|
| CIN2+                                                    | Intervention vs. reference group                 |
| CIN3+                                                    | Intervention vs. reference group                 |
| Screening participation                                  | Intervention group: self-sampling vs GP-sampling |
| Screening history                                        | Intervention group: self-sampling vs GP-sampling |
| HPV positivity rate                                      | Intervention group: self-sampling vs GP-sampling |
| HPV type distribution                                    | Intervention group: self-sampling vs GP-sampling |
| Cytology results*                                        | Intervention group                               |
| Compliance to follow-up among HPV positive self-samplers | Intervention group                               |
| Proportion and results of cervical cytology samples      | Reference group                                  |
| Colposcopies and conizations                             | Intervention vs. reference group                 |
| Cervical cancer incidence                                | Intervention vs. reference group                 |

579 Table notes: GP: General Practitioner. CIN2+: CIN2, CIN3/AIS, and cancer. CIN3+: CIN3/AIS, and cancer.  
580 \*)Only available for women with a HPV positive GP-sample or GP-triage sample following a HPV positive self-sample.  
581

582 **Table 2: Overview over data sources and information**

| Data sources                                          | Information                                                              |
|-------------------------------------------------------|--------------------------------------------------------------------------|
| <b>Danish Pathology Data Bank</b> <sup>33</sup>       | Participation (yes/no)                                                   |
|                                                       | Participation by self-sampling or GP-based screening                     |
|                                                       | Cervical cytology samples and results in reference regions               |
|                                                       | Results of self-samples, cervical cytology samples and cervical biopsies |
|                                                       | Cervical biopsy performed (yes/no)                                       |
|                                                       | Conization performed (yes/no)                                            |
|                                                       | Screening history                                                        |
| <b>Danish Civil Registration System</b> <sup>35</sup> | Residence                                                                |
|                                                       | Date of death, emigration and immigration                                |
| <b>Danish National Patient Register</b> <sup>37</sup> | Total hysterectomy and cervical amputation procedures                    |
|                                                       | Comorbidities                                                            |
| <b>Danish Cancer Registry</b> <sup>54</sup>           | Cervical cancer incidence                                                |
| <b>Statistics Denmark</b> <sup>53</sup>               | Sociodemographic factors (e.g. age, marital status and education level)  |

583 Table notes: GP: General Practitioner.

584  
585  
586 **Figure legends:**

587 Figure 1: Map of the intervention and reference regions

588 Figure 2: Clinical management of women attending screening at a GP

589 Figure 3: Clinical management of women attending self-sampling

1  
2  
3  
4  
5  
6  
7  
8  
9  
10  
11  
12  
13  
14  
15  
16  
17  
18  
19  
20  
21  
22  
23  
24  
25  
26  
27  
28  
29  
30  
31  
32  
33  
34  
35  
36  
37  
38  
39  
40  
41  
42  
43  
44  
45  
46  
47  
48  
49  
50  
51  
52  
53  
54  
55  
56  
57  
58  
59  
60

**Figure 1:**

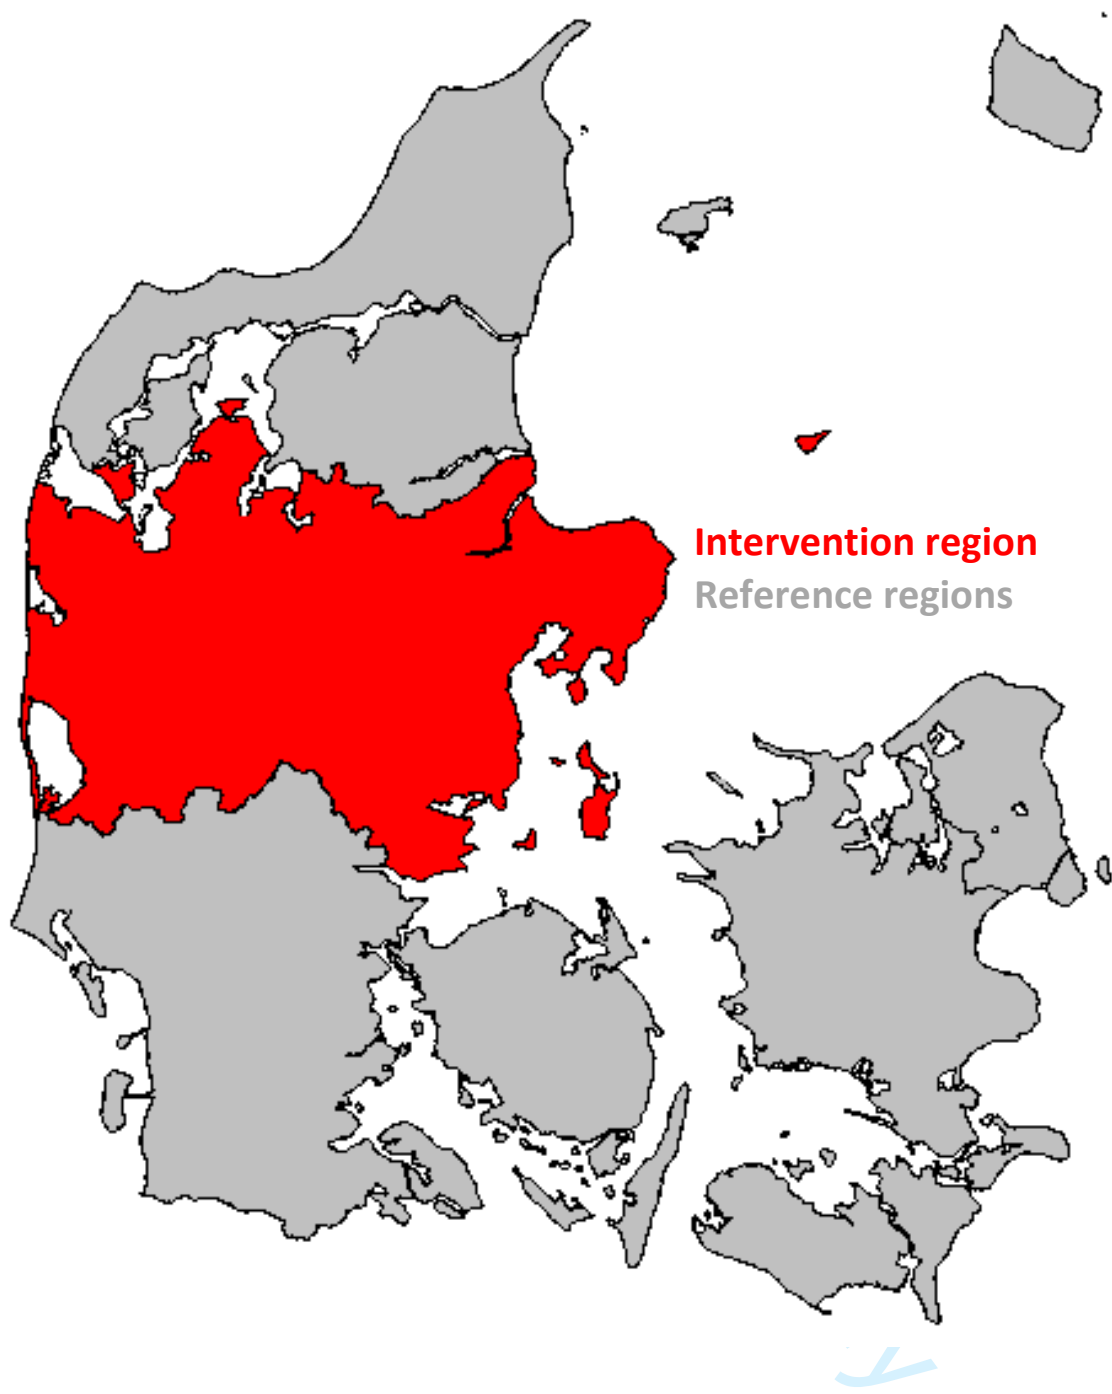



Figure 2:

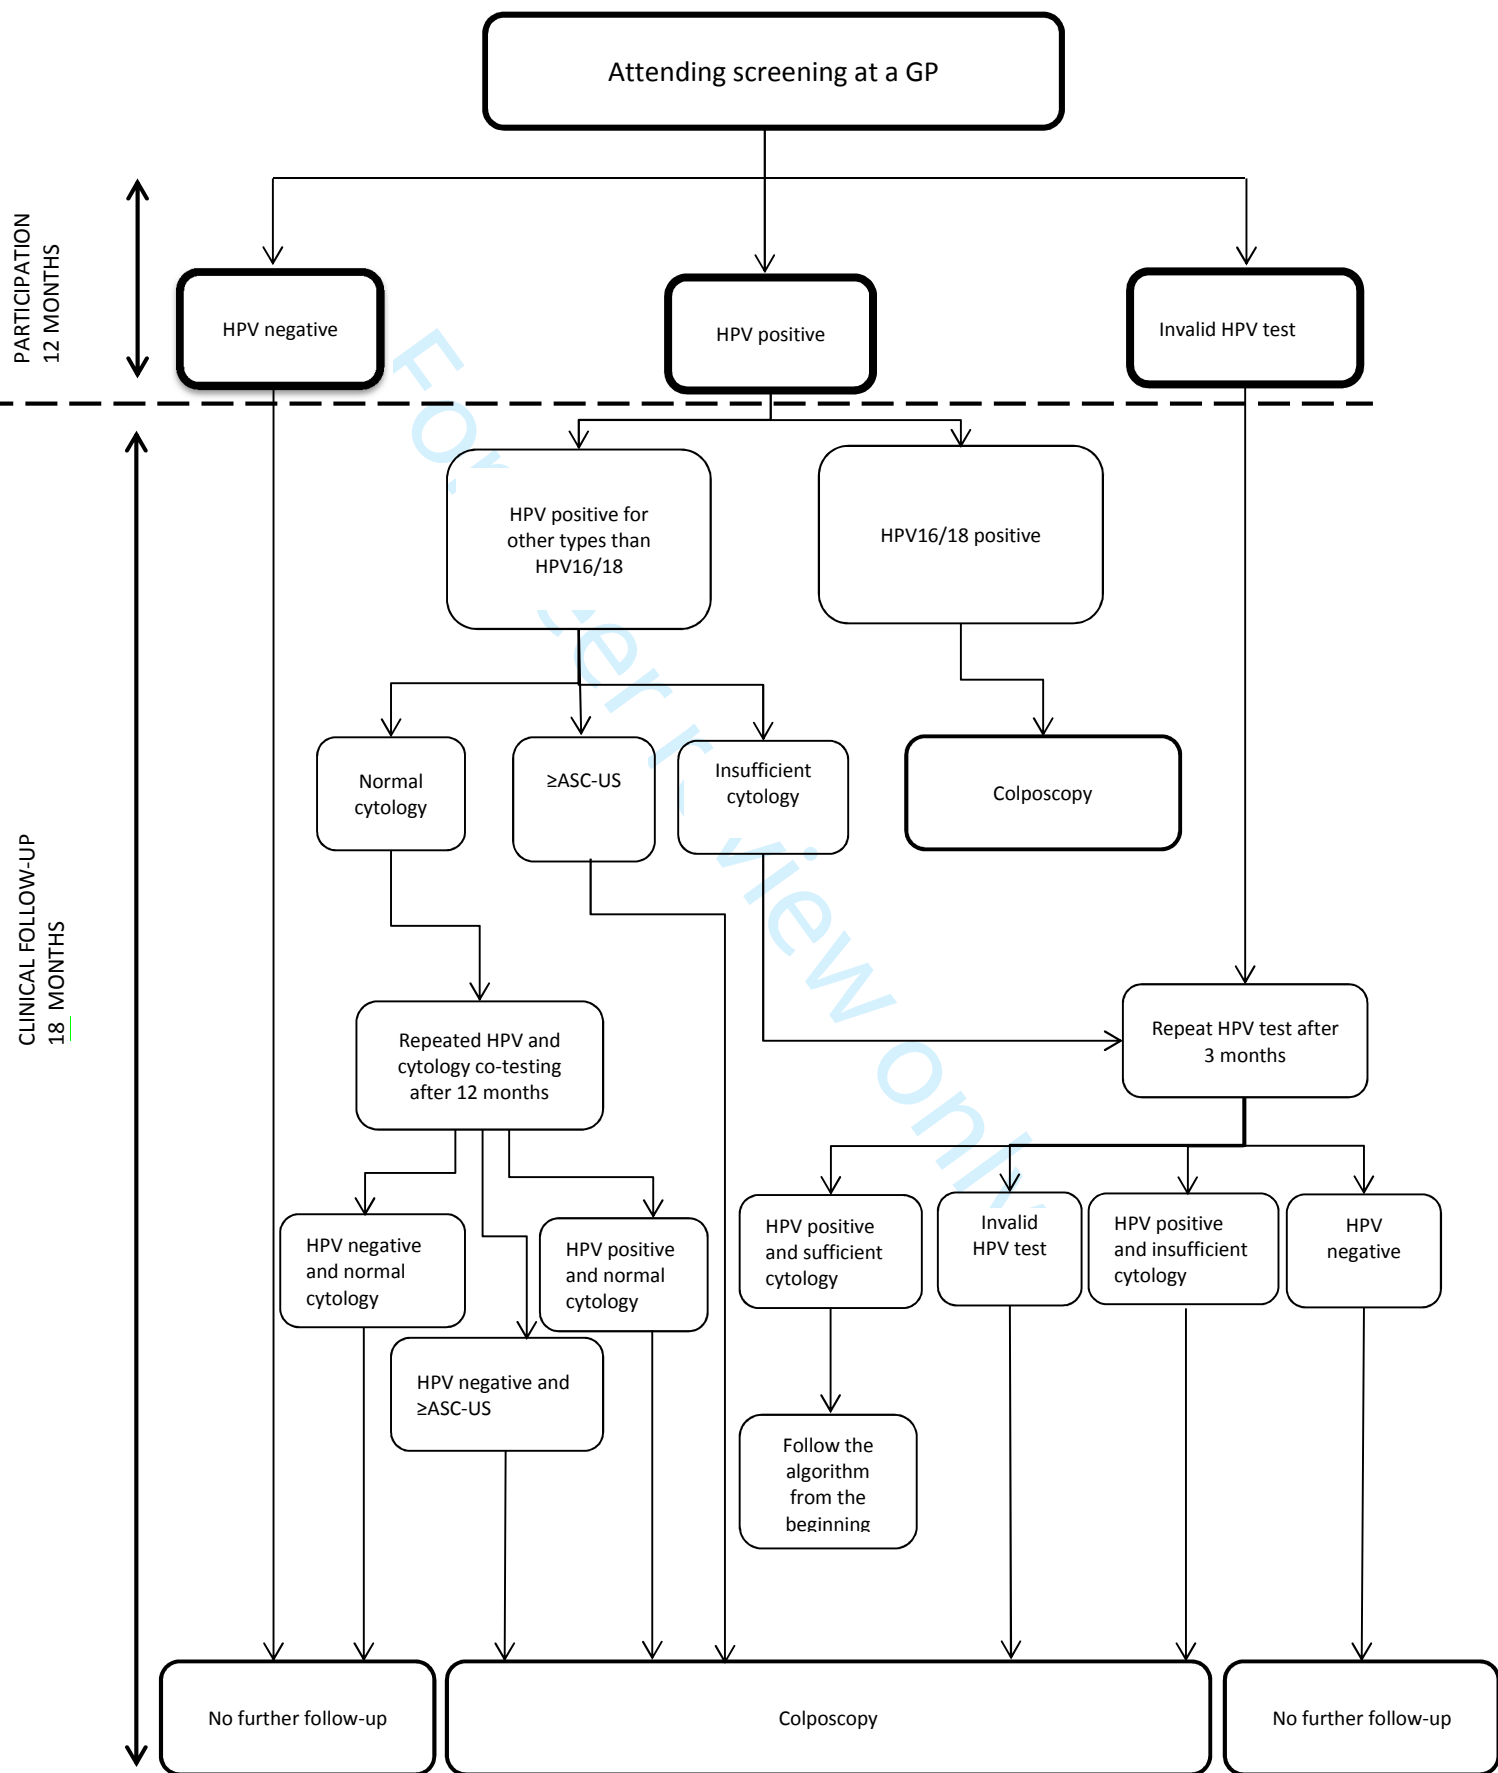

Figure notes: GP: General Practitioner. HPV: Human Papillomavirus. HPV other types than HPV16/18: 31, 33, 35, 39, 45, 51, 52, 56, 58, 59, 66 and 68. ≥ASC-US includes: Atypical Squamous Cells of Undetermined Significance (ASC-US); Low-grade Squamous Intraepithelial Lesion (LSIL); Atypical Squamous Cells cannot exclude HSIL (ASC-H); High-grade Squamous Intraepithelial Lesion (HSIL); Squamous Cell Carcinoma (SCC); Atypical Glandular Cells (AGC); Adenocarcinoma In Situ (AIS); Adenocarcinoma (ACC) and malignant tumor cells.



Figure 3:

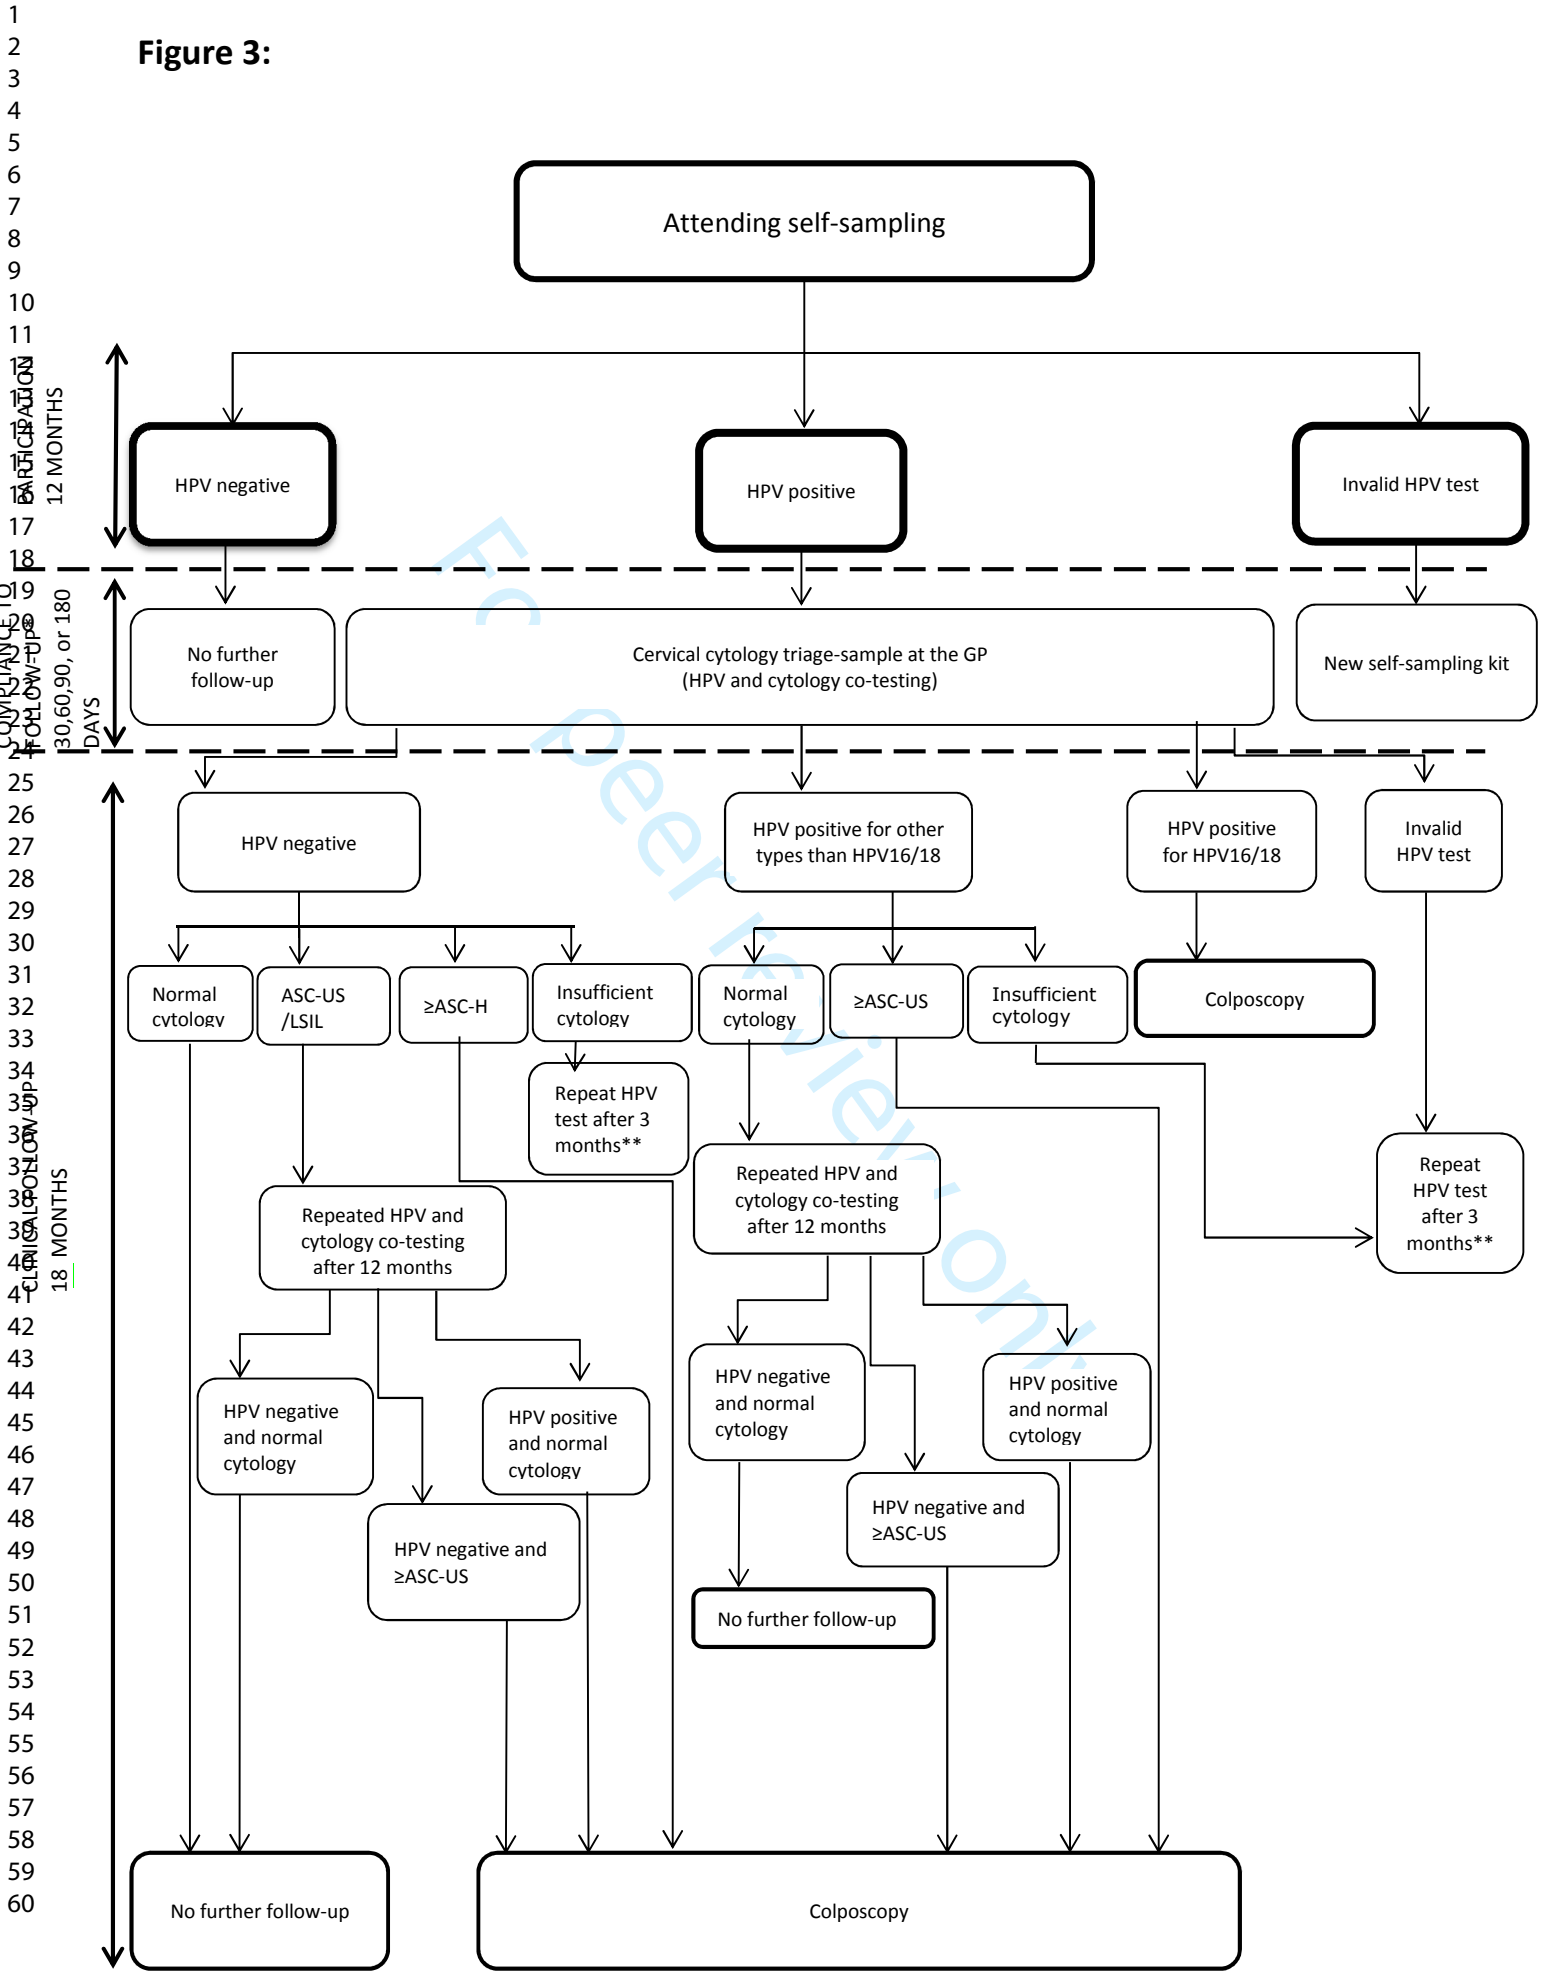

Figure notes: GP: General practitioner. HPV: Human Papillomavirus. HPV other types than HPV16/18: 31,33,35,39,45,51,52, 56,58,59,66 and 68. ≥ASC-US include: Atypical Squamous Cells of Undetermined Significance (ASC-US); Low-grade Squamous Intraepithelial Lesion (LSIL); Atypical Squamous Cells of Undetermined Significance (ASC-US); High-grade Squamous Intraepithelial Lesion (HSIL); Squamous Cell Carcinoma (SCC); Atypical Glandular Cells (AGC); Adenocarcinoma In Situ (AIS); Adenocarcinoma (ACC) and malignant tumor cells. ≥ASC-H include: ASC-H, HSIL, SCC, AGC, AIS, ACC, and malignant tumor cells. \*) Compliance to follow-up among HPV positive self-samplers. \*\*) Follows the same algorithm as shown in Figure 2 among women having repeating HPV testing after 3 months.

# BMJ Open

## EXPANDING THE UPPER AGE LIMIT FOR CERVICAL CANCER SCREENING: A PROTOCOL FOR A NATIONWIDE NON-RANDOMIZED INTERVENTION STUDY

|                                 |                                                                                                                                                                                                                                                                                                                                                                                                                                                                                                                                                                                                                                                                                                                                                                                                                                                                                                                                               |
|---------------------------------|-----------------------------------------------------------------------------------------------------------------------------------------------------------------------------------------------------------------------------------------------------------------------------------------------------------------------------------------------------------------------------------------------------------------------------------------------------------------------------------------------------------------------------------------------------------------------------------------------------------------------------------------------------------------------------------------------------------------------------------------------------------------------------------------------------------------------------------------------------------------------------------------------------------------------------------------------|
| Journal:                        | <i>BMJ Open</i>                                                                                                                                                                                                                                                                                                                                                                                                                                                                                                                                                                                                                                                                                                                                                                                                                                                                                                                               |
| Manuscript ID                   | bmjopen-2020-039636.R2                                                                                                                                                                                                                                                                                                                                                                                                                                                                                                                                                                                                                                                                                                                                                                                                                                                                                                                        |
| Article Type:                   | Protocol                                                                                                                                                                                                                                                                                                                                                                                                                                                                                                                                                                                                                                                                                                                                                                                                                                                                                                                                      |
| Date Submitted by the Author:   | 09-Oct-2020                                                                                                                                                                                                                                                                                                                                                                                                                                                                                                                                                                                                                                                                                                                                                                                                                                                                                                                                   |
| Complete List of Authors:       | tranberg, mette; Regional Hospital Randers, Department of Public Health Programmes<br>Petersen, Lone; Odense University Hospital, Department of Obstetrics and Gynecology; University of Southern Denmark, OPEN, Department of Clinical Medicine<br>Elfström, Klara; Karolinska Institutet, Dept of Laboratory Medicine; Regional Cancer Center, Cancer Screening Unit<br>Hammer, Anne ; Aarhus University, Department of Clinical Medicine; Regionshospitalet Herning, Department of Obstetrics and Gynecology<br>Blaakær, Jan; University of Southern Denmark, OPEN, Department of Clinical Medicine; Odense University Hospital, Department of Obstetrics and Gynecology<br>Bennetsen, Mary; Regional Hospital Randers, Department of Pathology<br>Jensen, Jørgen; Statens Serum Institut, Mycoplasma Laboratory<br>Andersen, Berit; Randers Regional Hospital, Public Health Programs; Aarhus University, Department of Clinical Medicine |
| <b>Primary Subject Heading</b>: | Public health                                                                                                                                                                                                                                                                                                                                                                                                                                                                                                                                                                                                                                                                                                                                                                                                                                                                                                                                 |
| Secondary Subject Heading:      | Epidemiology, Obstetrics and gynaecology                                                                                                                                                                                                                                                                                                                                                                                                                                                                                                                                                                                                                                                                                                                                                                                                                                                                                                      |
| Keywords:                       | EPIDEMIOLOGY, Cytopathology < PATHOLOGY, PREVENTIVE MEDICINE, PUBLIC HEALTH, GYNAECOLOGY                                                                                                                                                                                                                                                                                                                                                                                                                                                                                                                                                                                                                                                                                                                                                                                                                                                      |
|                                 |                                                                                                                                                                                                                                                                                                                                                                                                                                                                                                                                                                                                                                                                                                                                                                                                                                                                                                                                               |

SCHOLARONE™  
Manuscripts



I, the Submitting Author has the right to grant and does grant on behalf of all authors of the Work (as defined in the below author licence), an exclusive licence and/or a non-exclusive licence for contributions from authors who are: i) UK Crown employees; ii) where BMJ has agreed a CC-BY licence shall apply, and/or iii) in accordance with the terms applicable for US Federal Government officers or employees acting as part of their official duties; on a worldwide, perpetual, irrevocable, royalty-free basis to BMJ Publishing Group Ltd ("BMJ") its licensees and where the relevant Journal is co-owned by BMJ to the co-owners of the Journal, to publish the Work in this journal and any other BMJ products and to exploit all rights, as set out in our [licence](#).

The Submitting Author accepts and understands that any supply made under these terms is made by BMJ to the Submitting Author unless you are acting as an employee on behalf of your employer or a postgraduate student of an affiliated institution which is paying any applicable article publishing charge ("APC") for Open Access articles. Where the Submitting Author wishes to make the Work available on an Open Access basis (and intends to pay the relevant APC), the terms of reuse of such Open Access shall be governed by a Creative Commons licence – details of these licences and which [Creative Commons](#) licence will apply to this Work are set out in our licence referred to above.

Other than as permitted in any relevant BMJ Author's Self Archiving Policies, I confirm this Work has not been accepted for publication elsewhere, is not being considered for publication elsewhere and does not duplicate material already published. I confirm all authors consent to publication of this Work and authorise the granting of this licence.

# EXPANDING THE UPPER AGE LIMIT FOR CERVICAL CANCER SCREENING: A PROTOCOL FOR A NATIONWIDE NON-RANDOMIZED INTERVENTION

## STUDY

Mette Tranberg<sup>1\*</sup>, PhD, MSch.

Lone Kjeld Petersen<sup>2,3</sup>, MD, DMSc., Professor

K. Miriam Elfström<sup>4,5</sup>, PhD, MPH

Anne Hammer<sup>6,7</sup>, MD, PhD, Associate professor

Jan Blaakær<sup>2,3</sup>, MD, DMSc., Professor

Mary Holten Bennetsen<sup>8</sup>, MD

Jørgen Skov Jensen<sup>9</sup> MD, PhD, DMSc.,

Berit Andersen<sup>1,6</sup> MD, PhD, Professor

### Affiliations:

1. Department of Public Health Programmes, Randers Regional Hospital, Randers Denmark

2. Department of Obstetrics and Gynecology, Odense University Hospital, Odense Denmark

3. OPEN, Department of Clinical Medicine, Southern University of Denmark, Odense, Denmark

4. Department of Laboratory Medicine, Karolinska Institute, Stockholm, Sweden

5. Regional Cancer Center of Stockholm-Gotland, Stockholm, Sweden

6. Department of Clinical Medicine, Aarhus University, Aarhus, Denmark

7. Department of Obstetrics and Gynecology, Herning Regional Hospital, Herning, Denmark

8. Department of Pathology, Randers Regional Hospital, Randers, Denmark

9. Research Unit for Reproductive Microbiology, Statens Serum Institut, Copenhagen, Denmark

### Corresponding author:

Mette Tranberg, Department of Public Health Programmes. Randers Regional Hospital, Skovlyvej 15, 8930 Randers

NO, Denmark E-mail: mettrani@rm.dk. Tel: (+45) 78 42 02 64. ORCID:0000-0002-6285-6694.

1  
2  
3  
4  
5  
6  
7  
8  
9  
10  
11  
12  
13  
14  
15  
16  
17  
18  
19  
20  
21  
22  
23  
24  
25  
26  
27  
28  
29  
30  
31  
32  
33  
34  
35  
36  
37  
38  
39  
40  
41  
42  
43  
44  
45  
46  
47  
48  
49  
50  
51  
52  
53  
54  
55  
56  
57  
58  
59  
60

33 **E-mails:** Lone Kjeld Petersen: Lone.Kjeld.Petersen@rsyd.dk; Miriam Elfström: miriam.elfstrom@ki.se; Anne Hammer:

34 ahlauridsen@clin.au.dk; Jan Blaakær: jab@dadlnet.dk; Mary Holten Bennetsen: maryha@rm.dk; Jørgen Skov Jensen:

35 jsj@ssi.dk; Berit Andersen: berand@rm.dk

36  
37 **Number of words in text:** 4,121

38  
39 **Number of words in abstract:** 324

40 **Number of figures:** 3

41 **Number of tables:** 2

42 **Number of references:** 57

43  
44 **Trial registration:** NCT04114968.

45  
46 **Keywords:** Mass screening, HPV DNA testing, older women, cervical cancer screening, cervical cancer

## 48 **ABSTRACT**

### 50 **Introduction**

51 Cervical cancer screening ceases between the ages of 60 and 65 in most countries. Yet, a relatively high  
52 proportion of cervical cancers are diagnosed in women above the screening age. This study will evaluate if  
53 screening of women aged 65-69 years may result in increased detection of cervical intraepithelial neoplasia  
54 grade 2 or worse (CIN2+) compared to women not invited to screening. Invited women may choose  
55 between general practitioner (GP)-based screening or cervico-vaginal self-sampling. Furthermore, the study  
56 will assess if self-sampling is superior to GP-based screening in reaching long-term unscreened women.

### 57 **Methods and Analysis**

58 This population-based non-randomized intervention study will include 10,000 women aged 65-69 years,  
59 with no record of a cervical cytology sample or screening invitation in the 5 years before inclusion. Women  
60 who have opted-out of the screening program or have a record of hysterectomy or cervical amputation are  
61 excluded. Women residing in the Central Denmark Region are allocated to the intervention group, while  
62 women residing in the remaining four Danish regions are allocated to the reference group.

63 The intervention group is invited for human papillomavirus (HPV)-based screening by attending routine  
64 screening at the GP or by requesting a self-sampling kit. The reference group receives standard care which  
65 is the opportunity to have a cervical cytology sample obtained at the GP or by a gynaecologist. The study  
66 started in April 2019 and will run over the next 4.5 years.

67 The primary outcome will be the proportion of CIN2+ detected in the intervention and reference groups. In  
68 the intervention group, the proportion of long-term unscreened women attending GP-based screening or  
69 self-sampling will be compared.

### 70 **Ethics and dissemination**

71 The study has been submitted to the Ethical Committee in the Central Denmark Region which deemed that  
72 the study was not notifiable to the Committee and informed consent is therefore not required. The study is

1  
2  
3  
4  
5  
6  
7  
8  
9  
10  
11  
12  
13  
14  
15  
16  
17  
18  
19  
20  
21  
22  
23  
24  
25  
26  
27  
28  
29  
30  
31  
32  
33  
34  
35  
36  
37  
38  
39  
40  
41  
42  
43  
44  
45  
46  
47  
48  
49  
50  
51  
52  
53  
54  
55  
56  
57  
58  
59  
60

73 approved by the Danish Data Protection Regulation and the Danish Patient Safety Authority. Results will be  
74 disseminated in peer-reviewed journals.

75

For peer review only

## STRENGTHS AND LIMITATIONS OF THIS STUDY

- This population-based intervention study is the first to evaluate if expanding the upper screening age to include women aged 65-69-year and inviting them to choose between GP-based screening or self-sampling will result in increased detection of CIN2+ compared to existing practice (i.e. no screening).
- This study is the first to evaluate if self-sampling is superior to GP-based screening in reaching long-term unscreened women aged 65-69 years
- The risk of information bias and selection problems are minimized by using high-quality Danish registries and a population-based design
- The study design entails a risk of confounding due to the lack of randomization



1  
2  
3  
4  
5  
6  
7  
8  
9  
10  
11  
12  
13  
14  
15  
16  
17  
18  
19  
20  
21  
22  
23  
24  
25  
26  
27  
28  
29  
30  
31  
32  
33  
34  
35  
36  
37  
38  
39  
40  
41  
42  
43  
44  
45  
46  
47  
48  
49  
50  
51  
52  
53  
54  
55  
56  
57  
58  
59  
60

## 87 INTRODUCTION

88  
89 Cervical cancer screening ceases between the ages of 60 and 65 in most Western countries<sup>1-3</sup>. There is no  
90 solid evidence about which age and with which criteria to cease screening<sup>1,4-6</sup>, but the cessation of  
91 screening in older women is often justified by a low prevalence of high-risk human papillomavirus (HPV) in  
92 women  $\geq 55$  years<sup>7,8</sup> and by a concern that the harms of continuing screening may outweigh potential  
93 benefits<sup>2</sup>. Many countries with long-established screening programs, including Denmark, experience a  
94 second incidence peak of cervical cancer around the age of 75-80 years<sup>9,10</sup>, with a hysterectomy-corrected  
95 incidence rate of 29.4 per 100,000 person-years in women aged 75-79<sup>11</sup>. These older women are more  
96 often diagnosed with advanced-stage disease, and mortality due to cervical cancer is high as compared to  
97 younger women<sup>12,13</sup>. It has been hypothesized that the incidence peak at older ages could be a result of a  
98 mid-life change of sexual partners or reactivation of a latent HPV infection as the immune system weakens  
99 with age<sup>14-17</sup>. However, a recent Danish study of HPV DNA prevalence in women aged 69 and above  
100 showed no increase in prevalence that could explain the cervical cancer peak at older ages<sup>18</sup>. The authors  
101 stated that this result may be explained by the fact that an HPV infection may become undetectable at a  
102 late stage in the oncogenic process<sup>18,19</sup>. It has also been hypothesized that the current peak in older ages  
103 could be attributed to an insufficient screening history in older birth cohorts<sup>20</sup>. Whatever the reason, the  
104 increasing female life expectancy (at age 65 years it is about 20 additional years) has raised the question if  
105 the upper age limit for screening should be extended to 69 or 70 years<sup>10,21,22</sup>. Case-control studies have  
106 reported benefits of cervical cytology screening at older ages with respect to reduced incidence and  
107 mortality<sup>7,23-26</sup>, even among previously screened women<sup>4</sup>. However, a prospective evaluation of HPV-  
108 screening at ages 65-69 in a population-based intervention study including a reference group is missing.  
109 The effectiveness of cervical cancer screening among older women will depend on the participation rate  
110 and, in particular, the ability to reach long-term unscreened women, as these women have a pronounced  
111 risk of cancer<sup>6,27</sup>. Currently, participation in routine screening decreases with increasing age leaving a  
112 relatively high proportion of older women under-screened<sup>10</sup>. A potential solution to this challenge could be

1  
2  
3  
4 113 to offer older women a self-sampling kit for HPV testing (self-sampling). Self-sampling is an accurate and  
5  
6 114 well-accepted screening method, proven superior to physician-based screening in reaching long-term  
7  
8  
9 115 unscreened women <sup>28 29</sup>. Yet, it remains unknown whether an older screening population will benefit from a  
10  
11 116 self-sampling offer.

## 13 117 **OBJECTIVES**

16 118 This study will evaluate if expanding the upper screening age to include women aged 65-69-year and  
17  
18 119 inviting them to choose between general practitioner (GP)-based screening or self-sampling results in  
19  
20 120 increased detection of cervical intraepithelial neoplasia grade 2 or worse (CIN2+) compared to existing  
21  
22  
23 121 practice where women in this age group are not invited to routine screening. Furthermore, it will be  
24  
25 122 assessed whether self-sampling is better than GP-based screening in reaching long-term unscreened  
26  
27 123 women.

## 32 125 **HYPOTHESES**

34 126 We hypothesize that expanding the upper screening age will result in increased detection of CIN2+ cases  
35  
36  
37 127 and, long-term, potentially reduce the cervical cancer incidence compared to women not invited to  
38  
39 128 screening. Finally, we hypothesize that self-sampling will be superior to GP-based screening in reaching  
40  
41 129 long-term unscreened women.

## METHODS AND ANALYSIS

### Setting

Organized cervical cancer screening was introduced in parts of Denmark in the 1960s and became nationwide in the late 1990s<sup>30 31</sup>. Screening in Denmark is currently organized by the five regions (North, Central, South, Zealand, and Capital) following national guidelines<sup>31 32</sup>. Cervical cancer screening is centralized to one or a few pathology departments in each region<sup>31</sup>. Danish women are invited to schedule an appointment with their GP for liquid-based cytology screening every third year when aged 23 to 49 years and every fifth year when aged 50 to 64 years<sup>31</sup>. Since 2012, women aged 60-64 years have been screened with an HPV DNA-check-out test, after which HPV negative women can exit the program without consideration of their previous screening history<sup>32</sup>. Outside the organized program, women can have a cervical cytology sample taken by a GP or a gynecologist opportunistically or due to clinical symptoms at any time. In Denmark, cervical cancer screening, including clinical follow-up and treatment, is free of charge<sup>31</sup>.

The intervention in this study will be run by the Department of Public Health Programmes, Randers Regional Hospital in the Central Denmark Region (CDR). The CDR is the second largest region in Denmark covering approximately one-fourth of the Danish population (1.2 million inhabitants)<sup>22</sup>. In the CDR, the Department of Public Health Programmes oversees sending screening invitations, reminders, and test results, while the Department of Pathology, Randers Regional Hospital handles and analyses all cervical cytology samples.

## **The call-recall invitation system**

The Danish screening program is based on an integrated call-recall system using data from the invitation module in the nationwide Danish Pathology Databank (DPDB)<sup>31 33 34</sup>. The Conseillers en Gestion et Informatique (CGI) Institute operates the call-recall system and it is designed so that each region only invites women residing in their catchment area. The call-recall system invites women for screening after the age-specific interval has passed since their latest invitation or cervical cytology sample (whichever came last). Samples obtained opportunistically, symptomatically or as part of surveillance are also recorded in the DPDB and postpone the next invitation. The system also keeps track of women who are ineligible for screening because they have actively opted out of the program or have had a hysterectomy. The latter registration is rather incomplete and varies between the regions. In detail, the invitation module links cervical cytology data (Systematized Nomenclature of Medicine, SNOMED codes: T8X3\* and T8X210) from the DPDB's main pathology module with information about residency and vital status from the Danish Civil Registration System<sup>35 36</sup>. Linkage is performed using the unique Civil Personal Registration number (CPR), which is assigned to every Danish citizen upon birth and to residents upon immigration<sup>36</sup>. The CPR number is used by all citizens for any contact to the Danish health care system.

## **Design and eligibility criteria**

This study is a nationwide prospective population-based non-randomized intervention study (i.e. a quasi-experimental design)<sup>37</sup>. Women will consecutively be deemed eligible if they meet the following criteria at the time of inclusion: aged 65 to 69 years; resident in Denmark for the past 5 years; no record of a cervical cytology sample or invitation in the past 5 years; not registered in the invitation module as having actively opted out of the screening program or having a record of total hysterectomy or cervical amputation in the Danish National Patient Register<sup>38</sup>. Eligible women residing in the CDR will be allocated to the intervention group, while women residing in the other four Danish regions will be allocated to the reference group (Figure 1). In the intervention group, the invitation module will be set-up to identify women fitting the

1  
2  
3  
4 177 inclusion criteria, and simultaneously a comparable list of eligible women in the reference group will be  
5  
6 178 compiled by CGI at the Department of Public Health Programmes' request. Inclusion started in April 2019  
7  
8  
9 179 and eligible women will be identified with six months' intervals until the desired number of women have  
10  
11 180 been included. The follow-up period for the included women will start on the date of the invitation and end  
12  
13 181 at time of death, emigration, cervical amputation, total hysterectomy, or end of study. Women that move  
14  
15 182 between the intervention region and reference regions in the follow-up period will subsequently be  
16  
17  
18 183 excluded from the analysis.  
19  
20

### 21 184 **Intervention group**

22  
23 185 Women living in the CDR and therefore eligible for the intervention group will be invited to HPV-based  
24  
25 186 cervical cancer screening by either scheduling an appointment for having a cervical cytology sample  
26  
27  
28 187 collected at their GP or collecting a cervico-vaginal sample themselves in their own home using a self-  
29  
30 188 sampling kit. Women will receive an invitation and an information sheet by digital mail, while those  
31  
32 189 exempted from digital mail as per routine will receive the information by postal mail <sup>39</sup>. The invitation  
33  
34 190 explains how to request the self-sampling kit and states that once the woman attends screening it will  
35  
36  
37 191 implicitly represent her consent to store her sample for future quality improvement of the screening  
38  
39 192 program. A phone number for calling the study investigator to decline this option will be available. Test  
40  
41 193 results, including follow-up recommendations, will be sent to the women by digital or postal mail and the  
42  
43 194 woman's GP will receive an electronic copy of the test result. Around 98% of all residents in Denmark are  
44  
45 195 listed with a GP <sup>40</sup>. As per routine, non-participants will receive up to two reminders at 3 and 6 months post  
46  
47  
48 196 invitation <sup>31</sup>. All information will be in Danish.  
49

### 50 197 **The self-sampling kit**

51  
52 198 The self-sampling kit can be requested by phone or through a study webpage. After receiving the orders in  
53  
54  
55 199 the department, the kit will be mailed to the women within four business days. The kit includes the dry  
56  
57 200 Evalyn<sup>®</sup> brush self-sampling device (Rovers Medical Devices B.V, Oss, Netherlands) <sup>41</sup>, written and picture-  
58  
59  
60

1  
2  
3  
4  
5  
6  
7  
8  
9  
10  
11  
12  
13  
14  
15  
16  
17  
18  
19  
20  
21  
22  
23  
24  
25  
26  
27  
28  
29  
30  
31  
32  
33  
34  
35  
36  
37  
38  
39  
40  
41  
42  
43  
44  
45  
46  
47  
48  
49  
50  
51  
52  
53  
54  
55  
56  
57  
58  
59  
60

201 based user instructions on how to collect and mail the self-sample, and a pre-stamped return envelope  
202 addressed to the Department of Pathology, Randers Regional Hospital <sup>42</sup>. The acceptability of both the self-  
203 sampling device and user instructions has been carefully evaluated in previous studies, although among  
204 younger women (30-59 years) <sup>43 44</sup>.

### 205 **Processing and analysis of samples**

206 In the intervention group, all samples will be prepared, processed and analyzed at the Department of  
207 Pathology, Randers Regional Hospital according to the routine laboratory protocols. All HPV testing will be  
208 performed using the clinically validated and Federal Drug Agency (FDA)-approved Cobas<sup>®</sup> 4800 DNA test  
209 (Roche Diagnostics, Switzerland) <sup>45</sup>, as this is the routine test platform used in the CDR. The test is an  
210 automated real-time PCR-based test designed to detect high-risk HPV types: 16,18,31,33,35,39,45,51,52,  
211 56,58,59,66 and 68 <sup>45 46</sup> and is validated for use on SurePath collected samples <sup>47</sup>. Results will be reported as  
212 1) HPV negative, 2) HPV positive (HPV16, HPV18 and/ or other HPV types) or 3) invalid <sup>42</sup>. All samples with  
213 an invalid test result will be re-tested, and the second result will be considered definitive. The Cobas test  
214 measures beta-globin as an internal control for sample cellularity, valid sample extraction, and  
215 amplification <sup>46</sup>.

216 As per routine, cervical cytology samples taken by the GPs will be collected using a cervical brush and rinsed  
217 in 10 mL SurePath medium (BD Diagnostics, Burlington, NC) and mailed to the Department of Pathology,  
218 Randers Regional Hospital for processing and HPV testing. For HPV positive women, reflex cytology testing  
219 will be performed on the residual cellular Surepath material. Cytology will be interpreted by  
220 cytotechnologists using computer-assisted microscopy and categorized per the Bethesda 2014 grading  
221 system as normal; inadequate; Atypical Squamous Cells of Undetermined Significance (ASC-US); Low-grade  
222 Squamous Intraepithelial Lesion (LSIL); Atypical Squamous Cells cannot exclude HSIL (ASC-H). High-grade  
223 Squamous Intraepithelial Lesion (HSIL); Squamous Cell Carcinoma (SCC); Atypical Glandular Cells (AGC),  
224 Adenocarcinoma In Situ (AIS); Adenocarcinoma (ACC), and malignant tumor cells. At the laboratory, the

1  
2  
3  
4 225 Evalyn brush device will be rinsed into 10 mL SurePath medium (BD Diagnostics, Burlington, NC) and  
5  
6 226 processed as previously described <sup>43</sup>.  
7  
8  
9 227 From the cervical cytology samples and self-samples, 2 mL of the SurePath medium will be placed in test  
10  
11 228 tubes for HPV testing. The residual eluate material from these samples will be stored at -80°C for future  
12  
13 229 extended genotyping and DNA methylation analysis. As part of the study, and only in the intervention  
14  
15 230 group, p16/Ki67 cytology dual staining (CINtec<sup>®</sup> PLUS cytology kit, Roche Diagnostics, Switzerland) will be  
16  
17  
18 231 performed consecutively on the residual SurePath cell-pellet obtained from women with an HPV positive  
19  
20 232 cervical cytology sample and sufficient material for cytology testing. The dual staining result will not affect  
21  
22 233 the clinical management of the woman. Except for the dual staining result, all test results will routinely be  
23  
24 234 registered in the DPDB <sup>34</sup>.

### 26 235 **Clinical management**

28  
29 236 Figures 2 and 3 show the recommended, and therefore, expected clinical management for women in the  
30  
31 237 intervention group, but management may deviate depending on the clinical presentation of the individual  
32  
33  
34 238 woman. The recommendations are in accordance with the routine screening guidelines for 60-64-year-old  
35  
36 239 women and the new guidelines for clinical management of older women with dysplasia and HPV <sup>32 48</sup>.  
37  
38 240 Women who are positive for HPV16 or 18 AND other types will be managed similar to HPV16/18 positive  
39  
40 241 women.  
41  
42 242 For women attending GP-based screening, those who tested HPV negative will have no further follow-up  
43  
44  
45 243 (Figure 2). Women tested positive for HPV 16/18 will be referred directly to colposcopy (regardless of the  
46  
47 244 cytology result). Women tested HPV positive for other types than HPV16/18 with ASC-US or more severe  
48  
49 245 cytological abnormalities will be referred to colposcopy, while women with HPV types other than HPV16/18  
50  
51 246 and normal cytology will undergo repeated co-testing (HPV and cytology) after 12 months and will be  
52  
53 247 referred for colposcopy if either test result is positive.  
54  
55  
56 248 Figure 3 presents the follow-up recommendations for women attending self-sampling. Women who tested  
57  
58 249 HPV negative in their self-sample will have no further follow-up. Women with an HPV positive self-sample  
59  
60

1  
2  
3  
4  
5  
6  
7  
8  
9  
10  
11  
12  
13  
14  
15  
16  
17  
18  
19  
20  
21  
22  
23  
24  
25  
26  
27  
28  
29  
30  
31  
32  
33  
34  
35  
36  
37  
38  
39  
40  
41  
42  
43  
44  
45  
46  
47  
48  
49  
50  
51  
52  
53  
54  
55  
56  
57  
58  
59  
60

(any genotype) will be advised to have a cervical cytology triage sample taken by their GP within 30 days to evaluate the need for referral to colposcopy. This triage sample will be co-tested with HPV and cytology. Women tested HPV negative with normal cytology will have no further follow-up, while those with ASC-US/LSIL cytology will undergo a repeat co-test (HPV and cytology) after 12 months and will be referred for colposcopy if either test result is positive. Those with ASC-H or more severe abnormalities will be referred for colposcopy. Women with an HPV positive triage cytology sample will follow the same recommendation as described for the GP-based screening (Figure 2).

For women referred for colposcopy, cervical punch biopsies will be taken from suspicious areas, supplemented with random biopsies according to Danish guidelines<sup>49</sup>. Some women may also undergo a diagnostic conization as part of a clinical "see-and-treat" study<sup>50</sup>. Histological examination of the cervical biopsies will be carried out at different local Pathology Departments and graded using the Cervical Intraepithelial Neoplasia (CIN) classification as normal (including inflammation and non-specific reactive features), CIN (not specified), CIN grade 1, 2 or 3/AIS, or invasive cancer.

### Reference group

Women in the reference group will receive usual care which, for 65-69-year-old women, is the opportunity to have a cervical cytology sample obtained at their GP or by a gynecologist for whatever reason. The women will not receive a screening invitation, but will be assigned individual pseudo screening invitation dates allowing comparison between the groups in our statistical analysis. In the following, the term "invitation date" will be used for both for the "true invitation dates" in the intervention group and "pseudo invitation dates" in the reference group. In all reference regions, samples from this age group are expected to be tested for HPV. Differences across the four regions are found in the HPV assay<sup>18</sup> and there may be minor differences in the triage-strategies, which may result in differences in indication for colposcopy referral. However, clinical management of women referred for colposcopy is expected to follow national guidelines as described above<sup>48 49</sup>.



1  
2  
3  
4  
5  
6  
7  
8  
9  
10  
11  
12  
13  
14  
15  
16  
17  
18  
19  
20  
21  
22  
23  
24  
25  
26  
27  
28  
29  
30  
31  
32  
33  
34  
35  
36  
37  
38  
39  
40  
41  
42  
43  
44  
45  
46  
47  
48  
49  
50  
51  
52  
53  
54  
55  
56  
57  
58  
59  
60

## 275 **Outcomes**

276 Overview of outcomes and planned comparisons is seen in Table 1.

277 In both groups, the primary outcome will be the proportion of CIN2+ (CIN2, CIN3/AIS, and cancer) detected  
278 within 18 months following registration of a cervical cytology sample or self-sample. The proportion of  
279 CIN3+ (CIN3/AIS, and cancer) will be a secondary outcome. The most severe histological test result will be  
280 used if more than one result is available in the follow-up period. Other outcomes in the intervention group  
281 will be screening participation measured 12 months after the invitation date, defined by returning a self-  
282 sample or having a cervical cytology taken; screening history of participants, stratified by sampling  
283 procedure; HPV positivity rate and HPV type distribution in self-samples versus GP-collected cervical  
284 cytology samples; cytology results, and the percentage of HPV positive self-samplers undergoing  
285 appropriate follow-up. Compliance to follow-up after self-sampling will be defined as attending a GP for a  
286 cervical cytology-triage sample within 30, 60, 90 or 180 days after mailing of the test results. The  
287 proportion and results of cervical cytology samples obtained among women not invited for screening will  
288 be identified in the reference group and measured 12 months post invitation date. As in another study<sup>2</sup>,  
289 the primary measure of harms will in both groups be the number of colposcopies/conizations performed,  
290 both overall and relatively to  $\leq$ CIN1, CIN2, CIN3/AIS, and cancers detected within a follow-up period of 18  
291 months after registration of a cervical cytology sample or self-sample. Long-term outcomes will be cervical  
292 cancer incidence rates reported by groups at 5- and 10-years post invitation dates. A description of  
293 histological type and FIGO stage of the detected cervical cancers will be provided.

## 294 **Data sources and statistical analysis**

295 An overview of data sources and information is seen in Table 2.

296 Baseline characteristics in both groups will be presented using descriptive statistics (numbers and  
297 proportions) on screening history, comorbidities, sociodemographic factors (e.g. age, marital status, and  
298 education level). Screening history will be categorized based on the woman's screening history in a 15-year  
299 period before screening exit (i.e. age 50-64) according to the results of the cytology screening at age 50-59

1  
2  
3  
4  
5  
6  
7  
8  
9  
10  
11  
12  
13  
14  
15  
16  
17  
18  
19  
20  
21  
22  
23  
24  
25  
26  
27  
28  
29  
30  
31  
32  
33  
34  
35  
36  
37  
38  
39  
40  
41  
42  
43  
44  
45  
46  
47  
48  
49  
50  
51  
52  
53  
54  
55  
56  
57  
58  
59  
60

and the HPV-exit test at age 60-64. The categorization of screening history is expected to be as follows <sup>6</sup>:

1) "Sufficiently screened with normal results" if women had a) at least one normal cytology at age 50-54 and b) at least one normal cytology at age 55-59, and c) no abnormal cytology (ASC-US or worse) at age 50-59, and d) HPV negative at age 60-64; 2) "Insufficiently screened with normal results" if women had one or more cytology samples with only normal results, but only in one or two age categories (50-54, 55-59 or 60-64); 3) "Long-term unscreened" if no cervical cytology sample at age 50-64; and 4) "Abnormal screening" if women a) had ASC-US or worse at least once at age 50-59 or b) HPV positive at age 60-64.

Screening participation, cervical cytology samples, numbers of colposcopies/conizations performed, compliance to follow-up among positive self-samplers, and disease outcomes (HPV positivity rate and histological outcomes) will be estimated as proportions. Participation in the intervention group will be reported by age groups, screening history, and sampling method (GP versus self-sampling). Regression analyses will be used to estimate the association between CIN2+ detection in women offered cervical cancer screening compared to those not offered screening. Both crude and adjusted estimates will be presented with 95% confidence intervals (CIs). Cumulative incidence rates of cervical cancer among women in the intervention and reference groups will be reported, including the distribution of the histological types and FIGO stage of the detected cancers. All statistical analyses will be performed using STATA version 16 (College Station, TX: StataCorp LP).

### Sample size

The sample size was determined by the primary outcome (CIN2+). In Denmark, approximately 167,000 Danish women are currently aged 65-69 years, 37,000 of whom (22,2%) reside in the CDR (intervention group) <sup>22</sup>. We anticipate that an estimated 55% of these will not have a record of a cervical cytology sample in the DPDB within the past five years. As follows, the study cohort will consist of a total of 91,850 women, including approximately 20,000 women in the intervention group. We assume that 50% of the eligible women in the intervention group will accept the screening offer and that the proportion of CIN2+ is 0.3% among participants. Thus, by including 10,000 women in the intervention group, the study will have a

1  
2  
3  
4  
5  
6  
7  
8  
9  
10  
11  
12  
13  
14  
15  
16  
17  
18  
19  
20  
21  
22  
23  
24  
25  
26  
27  
28  
29  
30  
31  
32  
33  
34  
35  
36  
37  
38  
39  
40  
41  
42  
43  
44  
45  
46  
47  
48  
49  
50  
51  
52  
53  
54  
55  
56  
57  
58  
59  
60

325 power of 80% to detect a difference in the CIN2+ proportion of 0.1 percentage points between the  
326 intervention and reference group. The proportion of CIN2+ that was chosen (0.3%) is a conservative  
327 estimate inspired by Swedish data reporting a CIN2+ proportion of 0.38% among 56-60-year-old women  
328 attending HPV-based screening using the Cobas 4800 test <sup>51</sup>.

### 329 **Timeline**

330 The study enrollment is expected to continue until 10,000 participants have been included in the  
331 intervention group. Invitations will be sent out prospectively over an expected 4.5 year-period starting  
332 April 2019.

### 333 **PATIENT AND PUBLIC INVOLVEMENT**

334 The research questions were developed in response to the on-going public and scientific discussion in  
335 Denmark regarding expanding the upper screening age in the organized cervical cancer screening program.  
336 No patients or patient organizations were involved in the development, design, or implementation of this  
337 study.

## ETHICS AND DISSEMINATION

### Ethics

According to the EU's General Data Protection Regulation, the project was listed at the record of processing activities for research projects in the CDR (j. no: 1-16-02-158-18). The study was approved by the Danish Patient Safety Authority (j.no: 3-3013-2634/1). The study protocol has been submitted to the Ethical Committee in the CDR. The Committee decided that according to the Consolidation Act on Research Ethics Review of Health Research Projects, Consolidation Act number 1083 of 15 September 2017 section 2 (1), this study is not notifiable to the Committee (j.no.: 73/2018) and informed consent is therefore not required.

### Dissemination

The study protocol is registered at ClinicalTrials.gov (NCT04114968) and is made public in this protocol article. The results will be reported through publication of peer-reviewed articles in international scientific journals and presented at national and international scientific meetings. Moreover, the study results will be disseminated to healthcare stakeholders, and patient organizations at scientific meetings, and to the general public through press releases.

1  
2  
3  
4  
5  
6  
7  
8  
9  
10  
11  
12  
13  
14  
15  
16  
17  
18  
19  
20  
21  
22  
23  
24  
25  
26  
27  
28  
29  
30  
31  
32  
33  
34  
35  
36  
37  
38  
39  
40  
41  
42  
43  
44  
45  
46  
47  
48  
49  
50  
51  
52  
53  
54  
55  
56  
57  
58  
59  
60

## STRENGTHS AND LIMITATIONS OF THIS STUDY

To our knowledge, this prospective population-based intervention study will be the first to evaluate if HPV-based cervical cancer screening among older women aged 65-69 years results in an increased detection of CIN2+ cases as compared to women not invited to screening. Importantly, this study will evaluate whether the potential harms of screening in older women are outweighed by the potential benefits of decreasing the incidence of cervical (pre)-cancer<sup>2 52</sup>. Overall, this knowledge will address important research gaps and may help guide future screening recommendations. Compared with previous studies which report, by necessity, only the effect of cytology screening at older ages<sup>7 23-26</sup> it is of great value for future decision making that this study will be able to determine the effect of screening at older ages in women who have had an exit HPV-test<sup>52</sup>.

A key strength is that the effect of the screening intervention will be measured prospectively within an organized program. From an implementation point of view, this will provide reliable estimates of the expected participation rates if extending the upper screening age together with the possibility of self-sampling would become routine. We will identify outcomes from the nationwide DPDB which has highly valid records on all pathology specimens in Denmark<sup>34</sup>, and the selection of study participants is population-based and determined by data from the invitation module; thus eliminating both information bias and selection problems. Important limitations should be mentioned. The lack of randomization gives rise to confounding of both known and unknown risk factors. Age<sup>6</sup>, screening history<sup>6</sup>, comorbidities<sup>53</sup>, education level<sup>6</sup>, marital status<sup>6</sup>, smoking status<sup>7</sup>, and sexual behavior<sup>6</sup> may be potential confounding factors for the association between screening status and cervical (pre)-cancer development. Except for smoking status and sexual behavior, we will be able to assess whether the distribution of the remaining factors is well-balanced between the groups by using individual-level registry data<sup>38 34 54</sup>. Ideally, eligible women in all Danish regions should have been individually randomized to the intervention and reference group instead of being allocated to the groups based on their geographical location. Unfortunately, this was not feasible from an organizational point of view. Potentially, there may have been regional differences in

1  
2  
3  
4  
5  
6  
7  
8  
9  
10  
11  
12  
13  
14  
15  
16  
17  
18  
19  
20  
21  
22  
23  
24  
25  
26  
27  
28  
29  
30  
31  
32  
33  
34  
35  
36  
37  
38  
39  
40  
41  
42  
43  
44  
45  
46  
47  
48  
49  
50  
51  
52  
53  
54  
55  
56  
57  
58  
59  
60

381 the proportion of CIN2+ cases detected prior to the start of our study. If that is the case, it may affect the  
382 impact of the intervention on CIN2+ detection rates. Fortunately, we will be able to take into account these  
383 potential regional differences by using data from the nationwide DPDB.

384 Detection of invasive and advanced cervical cancer is the optimal outcome measure to evaluate the effect  
385 of screening at older ages <sup>52</sup>, but given the relative rarity of cervical cancer in older women, the length of  
386 follow-up needed and the large sample size required, we chose CIN2+ and CIN3+ as the primary and  
387 secondary outcome, respectively. Yet, it should be noted that the majority of CIN2 and CIN3 lesions  
388 detected after age 65 might not have sufficient time to progress to invasive cancer in the remaining  
389 lifespan <sup>2</sup>. For screening purposes, including CIN2+ and CIN3 cases as the primary and secondary outcomes,  
390 respectively, may be justified by them being treatable endpoints (conization) in older non-reproductive  
391 women according to Danish guidelines <sup>48</sup>, while still recognizing that the detection and treatment of CIN3,  
392 and especially CIN2, may be considered as overtreatment, because an unknown proportion of these lesions  
393 would never have progressed to cancer in the woman's lifetime<sup>55</sup>. Specifically, it is important to take into  
394 account that conization is associated with an increased risk of bleeding and stenosis, which may hinder or  
395 challenge sampling from the cervix post-conization<sup>52</sup>, and that false-positive screening results may place  
396 some women in a surveillance cycle of unclear end, which may cause distress<sup>55</sup>.

1  
2  
3  
4  
5  
6  
7  
8  
9  
10  
11  
12  
13  
14  
15  
16  
17  
18  
19  
20  
21  
22  
23  
24  
25  
26  
27  
28  
29  
30  
31  
32  
33  
34  
35  
36  
37  
38  
39  
40  
41  
42  
43  
44  
45  
46  
47  
48  
49  
50  
51  
52  
53  
54  
55  
56  
57  
58  
59  
60

398

**Trial status**

Ongoing.

**Acknowledgements:**

Not applicable.

**Contributors:**

MT is the principal investigator of the study and is responsible for conducting the study overall. BA and MT conceived the original idea. Subsequently, LKP, ME, AH, MBH and JB also contributed to the design of the study. JSJ especially contributed with comments on the laboratory part of the protocol, while LKP, JB, and AH have provided clinical advice on follow-up of women with abnormal results. MT is the first author and drafted the first version of this protocol article, which was subsequently further developed by all authors, who also reviewed and approved the final version.

**Funding:**

The initiative and the study was partly funded by the Department of Public Health Programmes, Randers Regional Hospital, which is located in the Central Denmark Region. Some public funding had been provided by the Health Foundation (grant no.:18-B-0125) and other fundraising is on-going. The Health foundation had no role in the design of the study and collection, analysis, and interpretation of the data, and in writing the manuscript.

**Competing interests:**

Roche sponsors the Cobas HPV-DNA test kits and CINTec Plus test kits for the study. According to the contract between Roche and the Department of Public Health Programmes, Randers Regional Hospital, Roche has commented on the protocol article, but had no influence on the scientific process and no

1  
2  
3  
4  
5  
6  
7  
8  
9  
10  
11  
12  
13  
14  
15  
16  
17  
18  
19  
20  
21  
22  
23  
24  
25  
26  
27  
28  
29  
30  
31  
32  
33  
34  
35  
36  
37  
38  
39  
40  
41  
42  
43  
44  
45  
46  
47  
48  
49  
50  
51  
52  
53  
54  
55  
56  
57  
58  
59  
60

421 editorial rights pertaining to this manuscript. The authors retained the right to submit the manuscript. MT,  
422 JB, JSJ and BA have participated in other studies with HPV test kits sponsored by Roche and self-sampling  
423 devices sponsored by Axlab. MT has received honoraria from Roche Diagnostics and AstraZeneca for  
424 lectures on HPV self-sampling and HPV triage-methods, respectively. AH has received lecture fees from  
425 AstraZeneca. All authors declare no conflicts of interest.

**Patient consent:**

Not required

**Ethics approval:**

The study protocol has been submitted to the Ethical Committee in the CDR which deemed that the study  
was not notifiable to the Committee and informed consent is therefore not required.

**Provenance and peer review:**

Not commissioned; externally peer-reviewed.

For peer review only



1  
2  
3  
4  
5  
6  
7  
8  
9  
10  
11  
12  
13  
14  
15  
16  
17  
18  
19  
20  
21  
22  
23  
24  
25  
26  
27  
28  
29  
30  
31  
32  
33  
34  
35  
36  
37  
38  
39  
40  
41  
42  
43  
44  
45  
46  
47  
48  
49  
50  
51  
52  
53  
54  
55  
56  
57  
58  
59  
60434 **REFERENCES**

1. Arbyn M, Anttila A, Jordan J, et al. European Guidelines for Quality Assurance in Cervical Cancer Screening. Second edition--summary document. *Ann Oncol* 2010;21(3):448-58. doi: 10.1093/annonc/mdp471 [published Online First: 2010/02/24]
2. Saslow D, Solomon D, Lawson HW, et al. American Cancer Society, American Society for Colposcopy and Cervical Pathology, and American Society for Clinical Pathology screening guidelines for the prevention and early detection of cervical cancer. *Am J Clin Pathol* 2012;137(4):516-42. doi: 10.1309/ajcptgd94evrsjcg [published Online First: 2012/03/21]
3. Anttila A, von Karsa L, Aasmaa A, et al. Cervical cancer screening policies and coverage in Europe. *European journal of cancer* 2009;45(15):2649-58.
4. Rustagi AS, Kamineni A, Weiss NS. Point: cervical cancer screening guidelines should consider observational data on screening efficacy in older women. *Am J Epidemiol* 2013;178(7):1020-2. doi: 10.1093/aje/kwt167 [published Online First: 2013/08/24]
5. Isidean SD, Franco EL. Counterpoint: cervical cancer screening guidelines--approaching the golden age. *Am J Epidemiol* 2013;178(7):1023-6; discussion 27. doi: 10.1093/aje/kwt171 [published Online First: 2013/08/24]
6. Wang J, Andrae B, Sundstrom K, et al. Effectiveness of cervical screening after age 60 years according to screening history: Nationwide cohort study in Sweden. *PLoS Med* 2017;14(10):e1002414. doi: 10.1371/journal.pmed.1002414 [published Online First: 2017/10/25]
7. Castanon A, Landy R, Cuzick J, et al. Cervical screening at age 50-64 years and the risk of cervical cancer at age 65 years and older: population-based case control study. *PLoS Med* 2014;11(1):e1001585. doi: 10.1371/journal.pmed.1001585 [published Online First: 2014/01/24]
8. Gyllensten U, Gustavsson I, Lindell M, et al. Primary high-risk HPV screening for cervical cancer in post-menopausal women. *Gynecol Oncol* 2012;125(2):343-5. doi: 10.1016/j.ygyno.2012.01.036 [published Online First: 2012/02/02]
9. Engholm G, Ferlay J, Christensen N, et al. NORDCAN--a Nordic tool for cancer information, planning, quality control and research. *Acta Oncologica* 2010;49(5):725-36.
10. Sherman SM, Castanon A, Moss E, et al. Cervical cancer is not just a young woman's disease. *BMJ* 2015;350:h2729. doi: 10.1136/bmj.h2729 [published Online First: 2015/06/17]
11. Hammer A, Kahlert J, Rositch A, et al. The temporal and age-dependent patterns of hysterectomy-corrected cervical cancer incidence rates in Denmark: a population-based cohort study. *Acta Obstet Gynecol Scand* 2017;96(2):150-57. doi: 10.1111/aogs.13057 [published Online First: 2016/11/20]
12. Darlin L, Borgfeldt C, Widen E, et al. Elderly women above screening age diagnosed with cervical cancer have a worse prognosis. *Anticancer Res* 2014;34(9):5147-51. [published Online First: 2014/09/10]
13. Hammer A, Kahlert J, Gravitt PE, et al. Hysterectomy-corrected cervical cancer mortality rates in Denmark during 2002-2015: A registry-based cohort study. *Acta Obstet Gynecol Scand* 2019;98(8):1063-69. doi: 10.1111/aogs.13608 [published Online First: 2019/03/15]
14. Gravitt PE. Evidence and impact of human papillomavirus latency. *Open Virol J* 2012;6:198-203. doi: 10.2174/1874357901206010198 [published Online First: 2013/01/24]
15. Maglennon GA, Doorbar J. The biology of papillomavirus latency. *Open Virol J* 2012;6:190-7. doi: 10.2174/1874357901206010190 [published Online First: 2013/01/24]
16. Maglennon GA, McIntosh PB, Doorbar J. Immunosuppression facilitates the reactivation of latent papillomavirus infections. *J Virol* 2014;88(1):710-6. doi: 10.1128/jvi.02589-13 [published Online First: 2013/11/01]

17. Hammer A, de Koning MN, Blaakaer J, et al. Whole tissue cervical mapping of HPV infection: Molecular evidence for focal latent HPV infection in humans. *Papillomavirus Res* 2019;7:82-87. doi: 10.1016/j.pvr.2019.02.004 [published Online First: 2019/02/18]
18. Andersen B, Christensen BS, Christensen J, et al. HPV-prevalence in elderly women in Denmark. *Gynecol Oncol* 2019;154(1):118-23. doi: 10.1016/j.ygyno.2019.04.680 [published Online First: 2019/05/16]
19. Lei JA-O, Ploner A, Lagheden C, et al. High-risk human papillomavirus status and prognosis in invasive cervical cancer: A nationwide cohort study. (1549-1676 (Electronic))
20. Lynge E, Lönnberg S, Törnberg S. Cervical cancer incidence in elderly women-biology or screening history? *European journal of cancer* 2017;74:82-88.
21. Elit L. Role of cervical screening in older women. *Maturitas* 2014;79(4):413-20. doi: 10.1016/j.maturitas.2014.09.012 [published Online First: 2014/12/03]
22. Statistics Denmark. Statistik databanken 2020 [cited 2020 15 January]. Available from: [www.statistikbanken.dk](http://www.statistikbanken.dk) accessed Web Page 2020.
23. Andrae B, Kemetli L, Sparen P, et al. Screening-preventable cervical cancer risks: evidence from a nationwide audit in Sweden. *Journal of the National Cancer Institute* 2008;100(9):622-29. doi: 10.1093/jnci/djn099 [doi]
24. Rosenblatt KA, Osterbur EF, Douglas JA. Case-control study of cervical cancer and gynecologic screening: A SEER-Medicare analysis. *Gynecol Oncol* 2016;142(3):395-400. doi: 10.1016/j.ygyno.2016.06.016 [published Online First: 2016/07/09]
25. Kamineni A, Weinmann S, Shy KK, et al. Efficacy of screening in preventing cervical cancer among older women. *Cancer Causes Control* 2013;24(9):1653-60. doi: 10.1007/s10552-013-0239-4 [published Online First: 2013/06/08]
26. Rustagi AS, Kamineni A, Weinmann S, et al. Cervical screening and cervical cancer death among older women: a population-based, case-control study. *Am J Epidemiol* 2014;179(9):1107-14. doi: 10.1093/aje/kwu035 [published Online First: 2014/04/02]
27. Hammer A, Soegaard V, Maimburg RD, et al. Cervical cancer screening history prior to a diagnosis of cervical cancer in Danish women aged 60 years and older-A national cohort study. *Cancer Med* 2019;8(1):418-27. doi: 10.1002/cam4.1926 [published Online First: 2019/01/03]
28. Nelson EJ, Maynard BR, Loux T, et al. The acceptability of self-sampled screening for HPV DNA: a systematic review and meta-analysis. *Sexually transmitted infections* 2017;93(1):56-61. doi: 10.1136/sextrans-2016-052609 [doi]
29. Arbyn M, Smith SB, Temin S, et al. Detecting cervical precancer and reaching underscreened women by using HPV testing on self samples: updated meta-analyses. *Bmj* 2018;363:k4823. doi: 10.1136/bmj.k4823 [published Online First: 2018/12/07]
30. Lynge E, Clausen LB, Guignard R, et al. What happens when organization of cervical cancer screening is delayed or stopped? *Journal of medical screening* 2006;13(1):41-46. doi: 10.1258/096914106776179773 [doi]
31. Lynge E, Rygaard C, Baillet MVP, et al. Cervical cancer screening at crossroads. *Apmis* 2014;122(8):667-73.
32. Danish Health Authority. Screening for livmoderhalskræft-anbefalinger 2012 [In English: Cervical cancer screening-recommendations 2012]. Copenhagen [in Danish with English summary] 2012 [Available from: <https://www.sst.dk/~media/B1211EAFEDFB47C5822E883205F99B79.ashx> accessed 24 March 2020.
33. Lynge E, Andersen B, Christensen J, et al. Cervical screening in Denmark—a success followed by stagnation. *Acta Oncologica* 2017:1-8.
34. Erichsen R, Lash TL, Hamilton-Dutoit SJ, et al. Existing data sources for clinical epidemiology: the Danish National Pathology Registry and Data Bank. *Clinical epidemiology* 2010;2:51-56.
35. Bjerregaard B, Larsen OB. The Danish Pathology Register. *Scandinavian Journal of Public Health* 2011;39(7 Suppl):72-74. doi: 10.1177/1403494810393563 [doi]

1

2

3

4 540

5 541

6 542

7 543

8 544

9 545

10 546

11 547

12 548

13 549

14 550

15 551

16 552

17 553

18 554

19 555

20 556

21 557

22 558

23 559

24 560

25 561

26 562

27 563

28 564

29 565

30 566

31 567

32 568

33 569

34 570

35 571

36 572

37 573

38 574

39 575

40 576

41 577

42 578

43 579

44 580

45 581

46 582

47 583

48 584

49 585

50 586

51 587

52 588

53 589

54 590

55 591

56 592

57 592

58

59

60

36. Schmidt M, Pedersen L, Sørensen HT. The Danish Civil Registration System as a tool in epidemiology. *European journal of epidemiology* 2014;29(8):541-49.
37. Barnighausen T, Tugwell P, Rottingen JA, et al. Quasi-experimental study designs series-paper 4: uses and value. *J Clin Epidemiol* 2017;89:21-29. doi: 10.1016/j.jclinepi.2017.03.012 [published Online First: 2017/04/04]
38. Schmidt M, Schmidt SA, Sandegaard JL, et al. The Danish National Patient Registry: a review of content, data quality, and research potential. *Clin Epidemiol* 2015;7:449-90. doi: 10.2147/clep.S91125 [published Online First: 2015/11/26]
39. The Danish Agency for Digitisation. About NemID. 2020 [Available from: [https://www.nemid.nu/dk-en/about\\_nemid/](https://www.nemid.nu/dk-en/about_nemid/) accessed January 2020.
40. Pedersen KM, Andersen JS, Sondergaard J. General practice and primary health care in Denmark. *Journal of the American Board of Family Medicine : JABFM* 2012;25 Suppl 1:S34-8. doi: 10.3122/jabfm.2012.02.110216 [doi]
41. van Baars R, Bosgraaf RP, ter Harmsel BW, et al. Dry storage and transport of a cervicovaginal self-sample by use of the Evalyn Brush, providing reliable human papillomavirus detection combined with comfort for women. *Journal of clinical microbiology* 2012;50(12):3937-43. doi: 10.1128/JCM.01506-12 [doi]
42. Tranberg M, Bech BH, Blaakær J, et al. Study protocol of the CHOICE trial: a three-armed, randomized, controlled trial of home-based HPV self-sampling for non-participants in an organized cervical cancer screening program. *BMC cancer* 2016;16(1):835.
43. Tranberg M, Bech BH, Blaakær J, et al. Preventing cervical cancer using HPV self-sampling: direct mailing of test-kits increases screening participation more than timely opt-in procedures-a randomized controlled trial. *BMC cancer* 2018;18(1):273.
44. Tranberg M, Jensen JS, Bech BH, et al. Good concordance of HPV detection between cervico-vaginal self-samples and general practitioner-collected samples using the Cobas 4800 HPV DNA test. *Bmc Infectious Diseases* 2018;18 doi: ARTN 348 10.1186/s12879-018-3254-y
45. Heideman DA, Hesselink AT, Berkhof J, et al. Clinical validation of the cobas 4800 HPV test for cervical screening purposes. *Journal of clinical microbiology* 2011;49(11):3983-85. doi: 10.1128/JCM.05552-11 [doi]
46. Rao A, Young S, Erlich H, et al. Development and characterization of the cobas human papillomavirus test. *Journal of clinical microbiology* 2013;51(5):1478-84. doi: 10.1128/JCM.03386-12; 10.1128/JCM.03386-12
47. Ejegod DM, Hansen M, Christiansen IK, et al. Clinical validation of the Cobas 4800 HPV assay using cervical samples in SurePath medium under the VALGENT4 framework. *J Clin Virol* 2020;128:104336. doi: 10.1016/j.jcv.2020.104336 [published Online First: 2020/05/24]
48. Petersen LK. National Clinical Guideline for Cervical dysplasia. Examination, treatment, and management of women aged 60 and older [Only in Danish]: DSOG; 2019 [Available from: [https://www.sst.dk/-/media/Opgaver/Patientforl%C3%B8b-og-kvalitet/NKR/Puljefinansierede-NKR/pdf-version-af-published\\_guideline\\_2633.ashx?la=da&hash=0809DD9A773B341B3D08AE73C9361E2AB84029E8](https://www.sst.dk/-/media/Opgaver/Patientforl%C3%B8b-og-kvalitet/NKR/Puljefinansierede-NKR/pdf-version-af-published_guideline_2633.ashx?la=da&hash=0809DD9A773B341B3D08AE73C9361E2AB84029E8).
49. Petersen LK. Examination, treatment and control of cervical dysplasia [Only in Danish]: 2013: DSOG; 2013 [Available from: <http://gynobsguideline.dk/hindsgavl/Cervixdysplasi2012.pdf>.
50. Gustafson LW HA, Petersen LK, Andersen B, Bor P. "See and Treat" in an outpatient setting in women above 45 years with cervical dysplasia. For study protocol. See Clinicaltrials.gov. NCT:04298957. 2020
51. Sahlgren H, Elfstrom KM, Lamin H, et al. Colposcopic and histopathologic evaluation of women with HPV persistence exiting an organized screening program. *Am J Obstet Gynecol* 2020;222(3):253 e1-53 e8. doi: 10.1016/j.ajog.2019.09.039 [published Online First: 2019/10/05]

- 1  
2  
3  
4 593 52. Gravitt PE, Landy R, Schiffman M. How confident can we be in the current guidelines for  
5 594 exiting cervical screening? *Prev Med* 2018;114:188-92. doi:  
6 595 10.1016/j.ypmed.2018.07.005 [published Online First: 2018/07/10]  
7 596 53. Diaz A, Kang J, Moore SP, et al. Association between comorbidity and participation in  
8 597 breast and cervical cancer screening: A systematic review and meta-analysis. *Cancer*  
9 598 *Epidemiol* 2017;47:7-19. doi: 10.1016/j.canep.2016.12.010 [published Online First:  
10 599 2017/01/14]  
11 600 54. Thygesen LC, Daasnes C, Thaulow I, et al. Introduction to Danish (nationwide) registers on  
12 601 health and social issues: structure, access, legislation, and archiving. *Scand J Public*  
13 602 *Health* 2011;39(7 Suppl):12-6. doi: 10.1177/1403494811399956 [published Online  
14 603 First: 2011/09/08]  
15 604 55. Sawaya GF. Cervical cancer screening in women over 65. CON: Reasons for uncertainty.  
16 605 *Gynecol Oncol* 2016;142(3):383-4. doi: 10.1016/j.ygyno.2016.08.229 [published  
17 606 Online First: 2016/08/23]  
18 607 56. Gjerstorff ML. The Danish Cancer Registry. *Scand J Public Health* 2011;39(7 Suppl):42-5.  
19 608 doi: 10.1177/1403494810393562 [published Online First: 2011/08/04]  
20  
21 609  
22  
23  
24  
25  
26  
27  
28  
29  
30  
31  
32  
33  
34  
35  
36  
37  
38  
39  
40  
41  
42  
43  
44  
45  
46  
47  
48  
49  
50  
51  
52  
53  
54  
55  
56  
57  
58  
59  
60

1  
2  
3  
4  
5  
6  
7  
8  
9  
10  
11  
12  
13  
14  
15  
16  
17  
18  
19  
20  
21  
22  
23  
24  
25  
26  
27  
28  
29  
30  
31  
32  
33  
34  
35  
36  
37  
38  
39  
40  
41  
42  
43  
44  
45  
46  
47  
48  
49  
50  
51  
52  
53  
54  
55  
56  
57  
58  
59  
60

610 **Table 1: Overview of outcomes and planned comparisons**

| Outcome                                   | Comparisons                                      |
|-------------------------------------------|--------------------------------------------------|
| <b>CIN2+</b>                              | Intervention vs. reference group                 |
| <b>CIN3+</b>                              | Intervention vs. reference group                 |
| <b>Screening participation</b>            | Intervention group: self-sampling vs GP-sampling |
| <b>Screening history</b>                  | Intervention group: self-sampling vs GP-sampling |
| <b>HPV positivity rate</b>                | Intervention group: self-sampling vs GP-sampling |
| <b>HPV type distribution</b>              | Intervention group: self-sampling vs GP-sampling |
| <b>Cytology results*</b>                  | Intervention group                               |
| <b>Compliance to follow-up among</b>      | Intervention group                               |
| <b>HPV positive self-samplers</b>         |                                                  |
| <b>Proportion and results of cervical</b> | Reference group                                  |
| <b>cytology samples</b>                   |                                                  |
| <b>Colposcopies and conizations</b>       | Intervention vs. reference group                 |
| <b>Cervical cancer incidence</b>          | Intervention vs. reference group                 |

611 Table notes: GP: General Practitioner. CIN2+: CIN2, CIN3/AIS, and cancer. CIN3+: CIN3/AIS, and cancer.

612 \*)Only available for women with a HPV positive GP-sample or GP-triage sample following a HPV positive self-sample.

614 **Table 2: Overview over data sources and information**

| <b>Data sources</b>                                   | <b>Information</b>                                                                                                                                                                                                                                                                                                                            |
|-------------------------------------------------------|-----------------------------------------------------------------------------------------------------------------------------------------------------------------------------------------------------------------------------------------------------------------------------------------------------------------------------------------------|
| <b>Danish Pathology Data Bank</b> <sup>34</sup>       | Participation (yes/no)<br><br>Participation by self-sampling or GP-based screening<br><br>Cervical cytology samples and results in references regions<br><br>Results of self-samples, cervical cytology samples and cervical biopsies<br><br>Cervical biopsy performed (yes/no)<br><br>Conization performed (yes/no)<br><br>Screening history |
| <b>Danish Civil Registration System</b> <sup>36</sup> | Residence<br><br>Date of death, emigration and immigration                                                                                                                                                                                                                                                                                    |
| <b>Danish National Patient Register</b> <sup>38</sup> | Total hysterectomy and cervical amputation procedures<br><br>Comorbidities                                                                                                                                                                                                                                                                    |
| <b>Danish Cancer Registry</b> <sup>56</sup>           | Cervical cancer incidence                                                                                                                                                                                                                                                                                                                     |
| <b>Statistics Denmark</b> <sup>54</sup>               | Sociodemographic factors (e.g. age, marital status and education level)                                                                                                                                                                                                                                                                       |

615 Table notes: GP: General Practitioner.

616  
617  
618 **Figure legends:**

619 Figure 1: Map of the intervention and reference regions

620 Figure 2: Clinical management of women attending screening at a GP

621 Figure: 3 Clinical management of women attending self-sampling



1  
2  
3  
4  
5  
6  
7  
8  
9  
10  
11  
12  
13  
14  
15  
16  
17  
18  
19  
20  
21  
22  
23  
24  
25  
26  
27  
28  
29  
30  
31  
32  
33  
34  
35  
36  
37  
38  
39  
40  
41  
42  
43  
44  
45  
46  
47  
48  
49  
50  
51  
52  
53  
54  
55  
56  
57  
58  
59  
60

**Figure 1:**



Figure 2:



Figure notes: GP: General Practitioner. HPV: Human Papillomavirus. HPV other types than HPV16/18: 31, 33, 35, 39, 45, 51, 52, 56, 58, 59, 66 and 68. ≥ASC-US includes: Atypical Squamous Cells of Undetermined Significance (ASC-US); Low-grade Squamous Intraepithelial Lesion (LSIL); Atypical Squamous Cells cannot exclude HSIL (ASC-H); High-grade Squamous Intraepithelial Lesion (HSIL); Squamous Cell Carcinoma (SCC); Atypical Glandular Cells (AGC); Adenocarcinoma In Situ (AIS); Adenocarcinoma (ACC) and malignant tumor cells.



Figure 3:

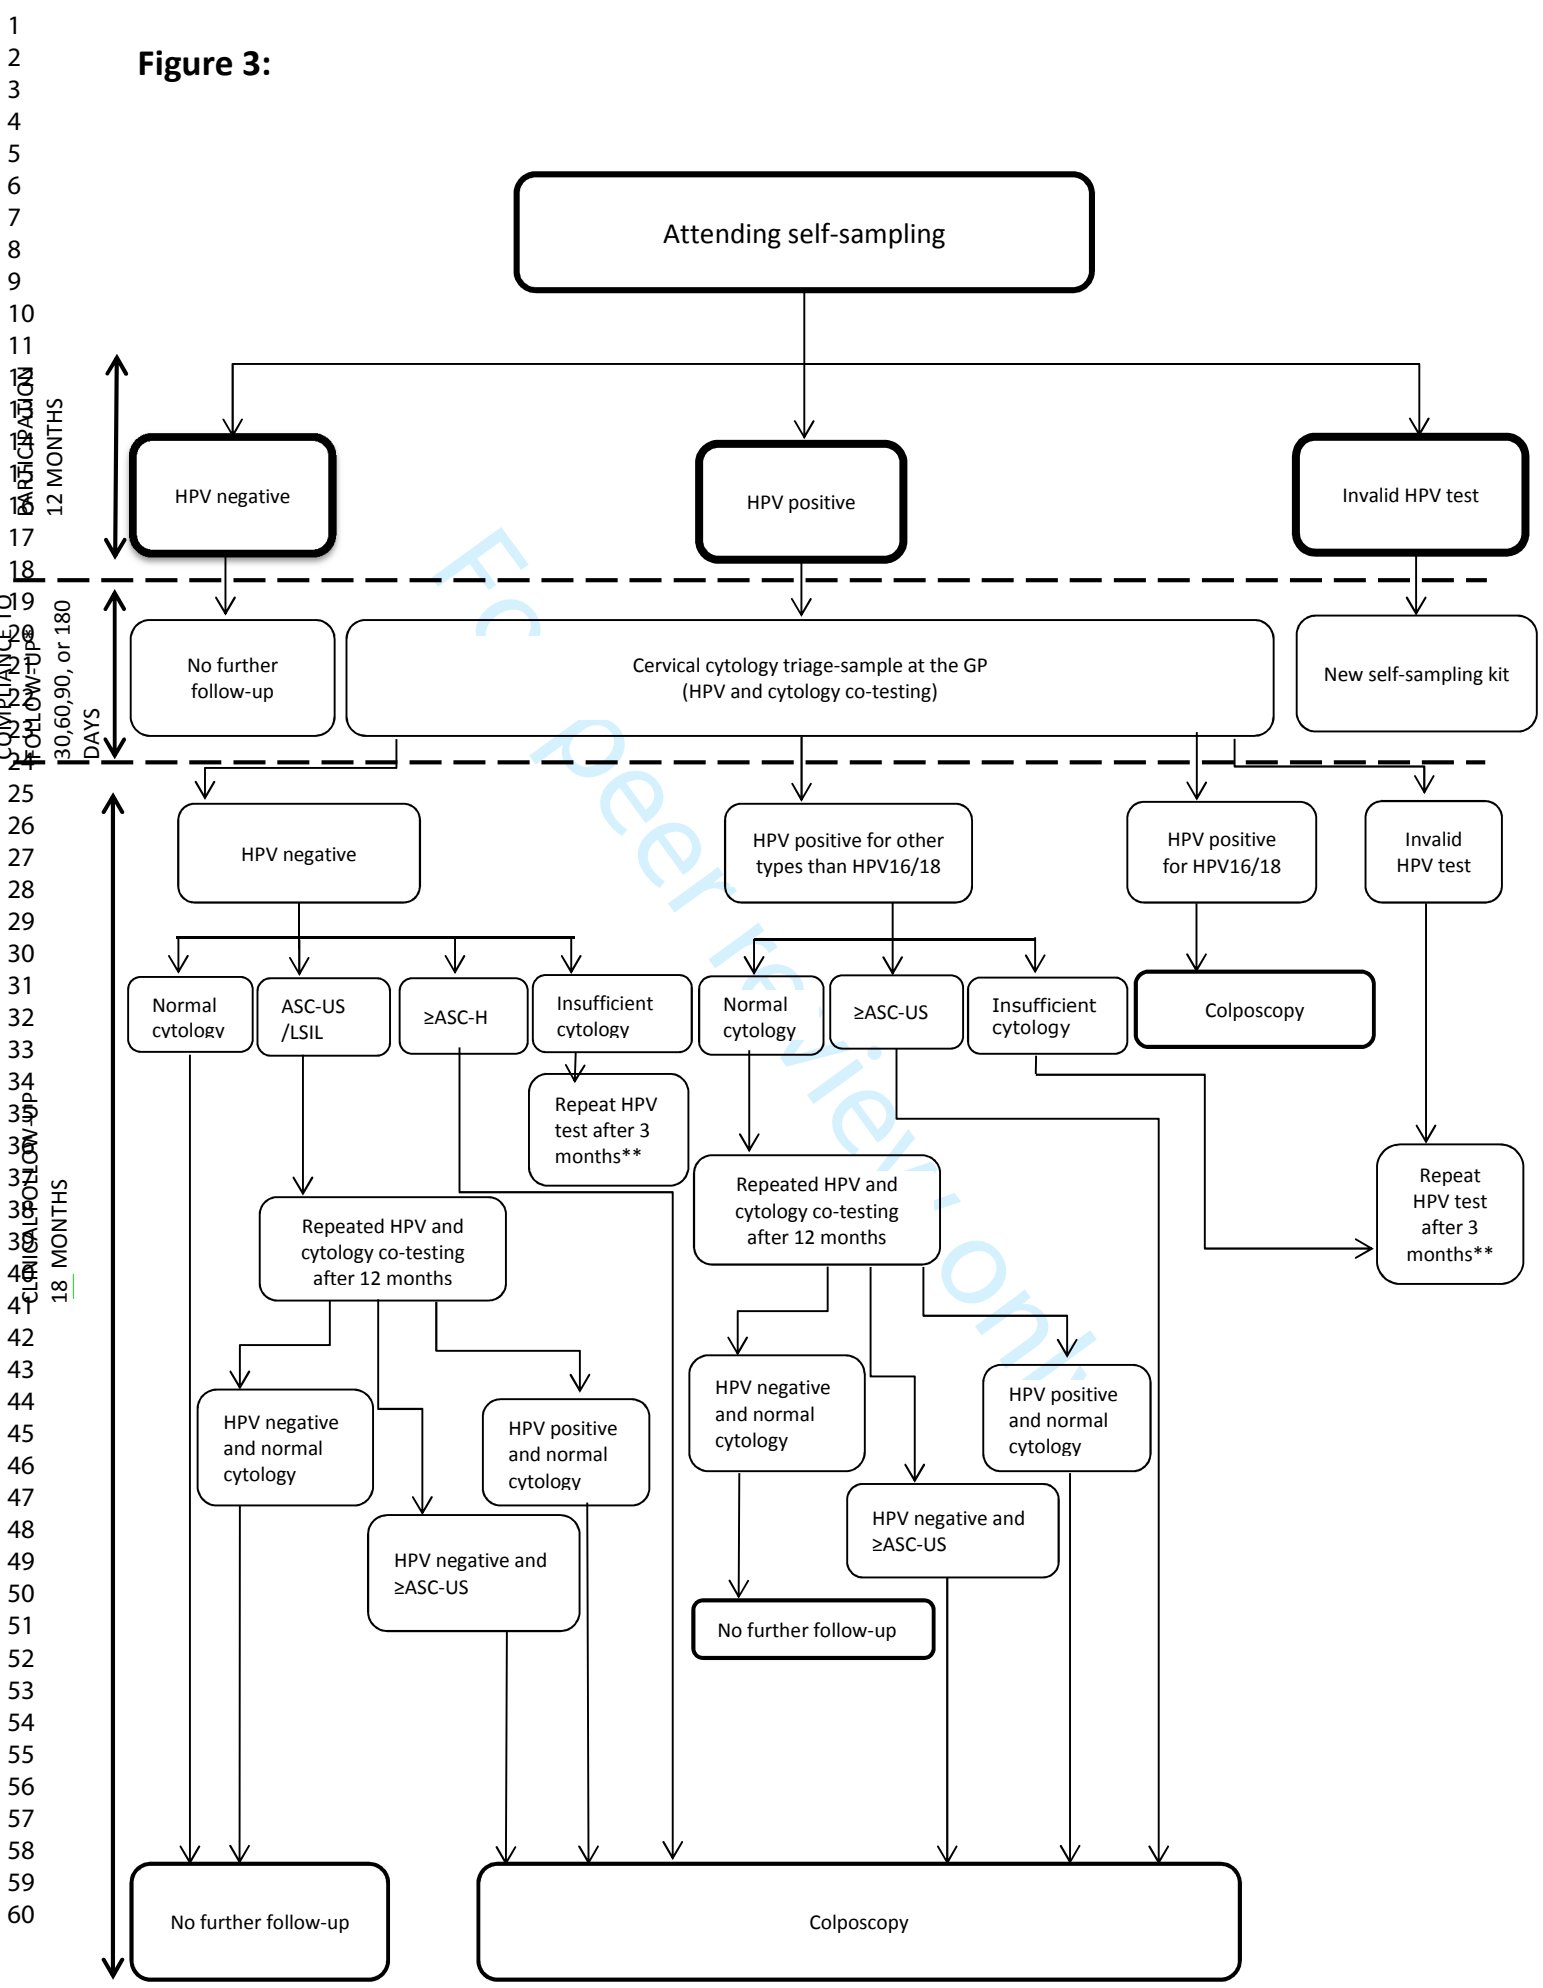

Figure notes: GP: General practitioner. HPV: Human Papillomavirus. HPV other types than HPV16/18: 31,33,35,39,45,51,52, 56,58,59,66 and 68. ≥ASC-US include: Atypical Squamous Cells of Undetermined Significance (ASC-US); Low-grade Squamous Intraepithelial Lesion (LSIL); Atypical Squamous Cells (ASC-H); High-grade Squamous Intraepithelial Lesion (HSIL); Squamous Cell Carcinoma (SCC); Atypical Glandular Cells (AGC); Adenocarcinoma In Situ (AIS); Adenocarcinoma (ACC) and malignant tumor cells. ≥ASC-H include: ASC-H, HSIL, SCC, AGC, AIS, ACC, and malignant tumor cells. \*) Compliance to follow-up among HPV positive self-samplers. \*\*) Follows the same algorithm as shown in Figure 2 among women having repeating HPV testing after 3 months.
